# Supplementary material for: The effect of genotype and in utero environment on interindividual variation in neonate DNA methylomes
Source: HighWire-hosted journal article supplement (doi:10.1101/gr.171439.113), 2014-04-07
Supplement: Supplemental_Legends.docx [file Supplemental_Legends.docx]

**Supplemental Figure 1: VMRs are present on all chromosomes but tend towards open seas** Circos diagram showing the variability in methylation across the genome and the CpGs under study.  Chromosomal ideogram is the outermost track (X and Y chromosomes are not shown), while average methylation values across the InfiniumHumanMethylation450 BeadChip and 237 subjects are depicted in the adjacent track (very dark green ≤0.2, light yellow 0.2-0.8, red ≥0.8).  Going towards the centre, MAD values are depicted as a black histogram, CpG Island definitions from UCSC are tiled in green, followed by the 1423 VMRs in a very dark purple tile-track. The track next to the VMR tile-track depicts the location of the VMR-CpG (shelf=grey, shore=brown, island=green, open sea=blue). The model which best explained the VMR-CpG is depicted in adjacent track as blue for GxE, and red for Genotype only. The –log10 of the p-value and R2 values from the methQTL analysis are depicted as histograms in dark purple colour.  The top MAD1500 CpGs have two tracks with orange histograms for the –log10 of the p-value and the R2 in the methQTL analysis. The Chinese-only VMRs are depicted in a very dark red tile-track and the –log10 of the p-value and R2 values in the methQTL analysis as histograms of same colour.

**Supplemental Figure 2: Genotype is significantly associated with VMR-CpGs** Histogram showing the p-value distribution from regression analysis of 1423 VMR-CpGs against all heterologous SNPs. P-values obtained from the regression analysis were binned into 1000 equally spaced bins and the number in each bin was counted to obtain frequency

**Supplemental figure 3 : A, the majority of the SNPs in the best models were in *cis* with the VMR-CpGs** Pie chart showing the proportions of the 1423 VMR-CpGs which were best explained by the genotype, environment or GxE regression models, sections are further divided by whether the SNP and VMR-CpG are in *cis* or *trans* **B, When only models with high levels of support are included, only *cis* SNPs remain** Pie chart showing the proportions of the 210 CpGs which were best explained by the genotype, environment or GxE regression models with no substantial support for the next best model (Δ>2) and adjusted R2 > 0.4, sections are further divided by whether the SNP and VMR-CpG are in *cis* or *trans*

**Supplemental Figure 4: A, Association with genotype is slightly weaker when analysis is restricted to subjects of Chinese ethnicity only** Scatter plot of R2 (x-axis) for the VMR-CpG and best SNP match against log2 of the number of regression p-values in first bin of the 1000 equally distributed bin (y-axis), the red line represents an absolutely even 658 regression p-values in the 1st bin. Disrupting pairs are black, *cis* pairs are grey and *trans* pairs are white. **B, Proportion of VMR-CpGs best explained by genotype decreases when analysis is restricted to subjects of Chinese ethnicity only** Pie chart showing the proportions of the 1365 VMR-CpGs which best explained by the genotype, environment or GxE regression models

**Supplemental Figure 5: A, Association with genotype is stronger when analysis is restricted to just the most divergent CpGs** Scatter plot of R2 (x-axis) for the VMR-CpG and best SNP match against log2 of the number of regression p-values in first bin of the 1000 equally distributed bin (y-axis), the red line represents an absolutely even 708 regression p-values in the 1st bin. Disrupting pairs are black, *cis* pairs are grey and *trans* pairs are white. **B, Proportion of the CpGs best explained by genotype increases when analysis is restricted to just the most variable CpGs** Pie chart showing the proportions of the 1500 CpGs which best explained by the genotype, environment or GxE regression models
