# Supplementary material for: The effect of genotype and in utero environment on interindividual variation in neonate DNA methylomes
Source: HighWire-hosted journal article supplement (doi:10.1101/gr.171439.113), 2014-04-07
Supplement: Supplemental_Methods.docx [file Supplemental_Methods.docx]

**Supplemental methods**

**Samples**

We selected 244 umbilical cord samples from babies born at the KK Women’s and Children’s Hospital (KKH) and the National University Hospital (NUH), in Singapore. These hospitals are part of the GUSTO birth cohort study (Soh et al. 2013). Written parental consent to participate in the study was given and hard copies are stored by the GUSTO data team. Ethical approval for the study and the consent forms and contents was granted, by the ethics boards of both KKH and NUH, which are centralised Institute Review Board (CIRB) and Domain Specific Review Board (DSRB), respectively. Gestational age was defined from a dating ultrasound (10-12 weeks) followed by an additional scan at 18–22 weeks. Subject characteristics can be found in Table 1. Birth weights and gestational terms fell within the normal range for Singaporean infants.

Testing for oral glucose tolerance (ogtt) was performed using a 75-g oral glucose tolerance test after overnight fasting (8 to 10 hours) at 26-28 weeks gestation. Depressive symptoms were assessed with the Edinburgh Postnatal Depression Scale (EPDS). This is a validated self-report instrument that contain 10 items of common depressive symptoms over the past week. The EPDS has proven to be reliable and sensitive in detecting perinatal depression and is also used to screen for antenatal depression in pregnant women (Cox et al. 1987)Based on Spitzer’s Research Diagnostic Criteria, a cut-off of 14/15 is generally used as its prediction on possible antenatal depression for most women (Gibson et al. 2009).

Plasma Vitamin B6 and pyridoxic acid were both measured using a reverse-phase high performance liquid chromatography (HPLC) method with post column derivatisation and fluorimetric detection . Folate and vitamin B12 were detected using the competitive electrochemiluminescence immunoassay where chemiluminescence emission is induced with the application of voltage to microparticles that are bound to the folate/vitamin B12 immunocomplexes and the signal, inversely proportional to the concentration of folate/vitamin B12, measured by a photomultiplier. Plasma ferritin was measured using sandwich ELSA methods using a commercial ELISA kit (AssayMax Human Ferritin ELISA, AssayPro). Plasma minerals Mg, Fe, Cu and Zn concentrations were determined by inductively coupled plasma mass spectrometry (ICP-MS model NexIon 300D, Perkin Elmer; Rotkreuz, Switzerland). Plasma EPA and DHA were separated by chromatography on a BPX-70 column (30 m×220 μm; film thickness 0.25 μm) fitted to a Hewlett-Packard HP6890 gas chromatograph and were identified by comparison with retention times of standards run previously and they were quantified using ChemStation software. Data were expressed as percentage contribution to the total plasma phosphatidylcholine fatty acid.

**Illumina Omniexpress + exome genotyping**

Genotyping was performed on DNA extracted from frozen umbilical cords using the Illumina omniexpress + exome array platform. These arrays type the most frequent SNPs genome wide (omniexpress) and all those discovered within exomes. DNA hybridization to arrays and scanning was performed by the service provider Expression Analysis Inc. Data are processed in GenomeStudio Genotyping ModuleTM. Genotyping calls were made by the GenCall software which incorporates a clustering algorithm (GenTrain) and a calling algorithm (Bayesian model). GenCall Score of each SNP probe and call rate of each sample are generated. The genotypes with a GenCall score less than 0.15 are not assigned genotypes. There were no poorly performing samples as defined by a low sample call rates or low GC Scores.

**Infinium 450K methylation assay**

Genomic DNA methylation analysis followed the manufacturers’ instructions. After extraction of genomic DNA from frozen umbilical cord specimens according to standard procedures, 1 µg was bisulfite converted using EZ DNA Methylation™ Gold Kit (Catalogue No.: D5002, Zymo Research). Successful conversion was confirmed via methylation-specific PCR prior to proceeding with subsequent steps of the Infinium assay protocol. The bisulfite converted genomic DNA was isothermally amplified at 37°C for 22hrs, enzymatically fragmented, purified and hybridized on an Infinium® HumanMethylation 450 BeadChip (Catalogue No.: WD-314-1002, Illumina Inc.) at 48°C for 18hrs. After which, the BeadChip was then washed to remove any un-hybridized or non-specific hybridized DNA. Labelled single-base extension was performed on primers hybridized with DNA, and the hybridized DNA was removed. The extended primers were stained with multiple layers of fluorescence, the BeadChip was then coated using a proprietary solution and scanned using the Illumina® iScan system. The image data were processed with the Genome Studio™ Methylation Module software.

**Infinium 450K data processing**

Data was processed as described previously (Pan et al. 2012). Inter and intra chip replicates were included and consistently clustered together in processed data. Seven samples failed QC and were removed from further analysis leaving 237 samples. As the Infinium experiments were run in two temporal batches data was processed separately and then combined. Sex chromosome data were removed. After combination, quantile normalisation was performed across all samples. A temporal batch effect was observed upon PCA analysis. Therefore the data was converted to M-values (Du et al. 2010) and the batch effect corrected via a widely used empirical Bayes methodology (COMBAT) (Johnson et al. 2007). Data were converted back to beta values. All probes identified as cross-hybridising in either Chen et al (2013) (Chen et al. 2013) or Price et al (Price et al. 2013) were removed from the dataset. 301,468 probes remained.

Chen YA, Lemire M, Choufani S, Butcher DT, Grafodatskaya D, Zanke BW, Gallinger S, Hudson TJ, Weksberg R. 2013. Discovery of cross-reactive probes and polymorphic CpGs in the Illumina Infinium HumanMethylation450 microarray. *Epigenetics* **8**(2): 203-209.

Cox JL, Holden JM, Sagovsky R. 1987. Detection of postnatal depression. Development of the 10-item Edinburgh Postnatal Depression Scale. *Br J Psychiatry* **150**: 782-786.

Du P, Zhang X, Huang CC, Jafari N, Kibbe WA, Hou L, Lin SM. 2010. Comparison of Beta-value and M-value methods for quantifying methylation levels by microarray analysis. *BMC Bioinformatics* **11**: 587.

Gibson J, McKenzie-McHarg K, Shakespeare J, Price J, Gray R. 2009. A systematic review of studies validating the Edinburgh Postnatal Depression Scale in antepartum and postpartum women. *Acta Psychiatr Scand* **119**(5): 350-364.

Johnson WE, Li C, Rabinovic A. 2007. Adjusting batch effects in microarray expression data using empirical Bayes methods. *Biostatistics* **8**(1): 118-127.

Pan H, Chen L, Dogra S, Ling Teh A, Tan JH, Lim YI, Lim YC, Jin S, Lee YK, Ng PY et al. 2012. Measuring the methylome in clinical samples: Improved processing of the Infinium Human Methylation450 BeadChip Array. *Epigenetics* **7**(10): 1173-1187.

Price ME, Cotton AM, Lam LL, Farre P, Emberly E, Brown CJ, Robinson WP, Kobor MS. 2013. Additional annotation enhances potential for biologically-relevant analysis of the Illumina Infinium HumanMethylation450 BeadChip array. *Epigenetics Chromatin* **6**(1): 4.

Soh SE, Tint MT, Gluckman PD, Godfrey KM, Rifkin-Graboi A, Chan YH, Stunkel W, Holbrook JD, Kwek K, Chong YS et al. 2013. Cohort Profile: Growing Up in Singapore Towards healthy Outcomes (GUSTO) birth cohort study. *Int J Epidemiol*.
