# Supplementary material for: The effect of genotype and in utero environment on interindividual variation in neonate DNA methylomes
Source: HighWire-hosted journal article supplement (doi:10.1101/gr.171439.113), 2014-04-07
Supplement: Supplemental_Tables_1-5.docx [file Supplemental_Tables_1-5.docx]

**The effect of genotype and *in utero* environment on inter-individual variation in neonate DNA methylomes**

Ai Ling Teh*1, Hong Pan*1,2, Li Chen1, Mei-Lyn Ong1, Shaillay Dogra1, Johnny Wong1, Julia L MacIsaac3, Sarah M Mah3, Lisa M McEwen3, Seang-Mei Saw4, Keith M Godfrey5, Yap-Seng Chong1,6, Kenneth Kwek7, Chee-Keong Kwoh2, Shu-E Soh4,6, Mary FF Chong1,6, Sheila Barton5, Neerja Karnani1, Clara Y Cheong1, Jan Paul Buschdorf1, Walter Stunkel1, Michael S Kobor3, Michael J Meaney1,8, Peter D Gluckman1,9, Joanna D Holbrook1†

**Supplement Tables 1-5**

Supplemental table 1: VMR distribution across chromosomes in the context of array design

| CHR | # probes | # regions possible | Observed # VMRs | expected # regions | obs/exp |
| --- | --- | --- | --- | --- | --- |
| 1 | 29743 | 5045 | 114 | 133.68 | 85% |
| 2 | 22468 | 3871 | 112 | 102.57 | 109% |
| 3 | 15743 | 2560 | 44 | 67.83 | 65% |
| 4 | 12710 | 2243 | 73 | 59.43 | 123% |
| 5 | 15684 | 2569 | 89 | 68.07 | 131% |
| 6 | 22255 | 3123 | 148 | 82.75 | 179% |
| 7 | 19294 | 3598 | 98 | 95.34 | 103% |
| 8 | 13740 | 2478 | 81 | 65.66 | 123% |
| 9 | 6346 | 1553 | 15 | 41.15 | 36% |
| 10 | 16131 | 2834 | 79 | 75.09 | 105% |
| 11 | 18904 | 3231 | 75 | 85.61 | 88% |
| 12 | 15327 | 2828 | 98 | 74.94 | 131% |
| 13 | 7862 | 1380 | 50 | 36.57 | 137% |
| 14 | 9361 | 1722 | 23 | 45.63 | 50% |
| 15 | 9429 | 1674 | 39 | 44.36 | 88% |
| 16 | 14595 | 2866 | 54 | 75.94 | 71% |
| 17 | 18103 | 3387 | 73 | 89.75 | 81% |
| 18 | 3624 | 706 | 17 | 18.71 | 91% |
| 19 | 15475 | 3220 | 74 | 85.32 | 87% |
| 20 | 6677 | 1187 | 22 | 31.45 | 70% |
| 21 | 2769 | 585 | 22 | 15.5 | 142% |
| 22 | 5228 | 1043 | 23 | 27.64 | 83% |

Supplemental table 2:enrichment analysis for CpG islands, shores, shelves and open seas

|  | **Island** | **South shore** | **North shore** | **South shelf** | **North shelf** | **Open sea** | **Total** |
| --- | --- | --- | --- | --- | --- | --- | --- |
| **Regions on array** | 149981 | 46254 | 58976 | 8262 | 10600 | 97861 | 371934 |
| **VMR-CpGs** | 451 | 173 | 252 | 29 | 41 | 477 | 1423 |
| **(p-value)** | (1) | (0.61) | **(0.027)** | (0.64) | (0.43) | **(6.64x10-10)** |  |
| **VMR-CpGs best explained by Genotype model** | 113 | 48 | 57 | 3 | 10 | 131 | 362 |
| **(p-value)** | (1) | (0.28) | (0.49) | (0.96) | (0.46) | **(1.38x10-5)** |  |
| **VMR-CpGs best explained by GXE models** | 338 | 125 | 195 | 26 | 31 | 346 | 1061 |
| **(p-value)** | (1) | (0.72) | **(0.012)** | (0.26) | (0.40) | **(2.12x10-6)** |  |

Supplemental table 3:enrichment analysis for DNase Hypersensitivity sites

|  | **DHS site (DHS peak existing in any of ENCODE cell lines)** | **Not DHS site** | **Total** |
| --- | --- | --- | --- |
| Regions on array | 335548 | 36386 | 371934 |
| VMR-CpGs | 1268 | 155 | 1423 |
|  | 0.9126571 |  |  |
| VMR-CpGs best explained by genotype model | 327 | 35 | 362 |
| p-value | 0.4449086 |  |  |
| GXE models | 941 | 120 | 1061 |
| p-value | 0.9456697 |  |  |

Supplemental table 4:enrichment analysis for Promoters

|  | **promoter** | **not promoter** | **Total** |
| --- | --- | --- | --- |
| Regions on array | 132556 | 239378 | 371934 |
| VMR-CpGs | 301 | 1122 | 1423 |
| p-value | 1 |  |  |
| VMR-CpGs best explained by genotype model | 73 | 289 | 362 |
| p-value | 1 |  |  |
| VMR-CpGs best explained by GXE models | 228 | 833 | 1061 |
| p-value | 1 |  |  |

Supplemental table 5:enrichment analysis for Enhancers

|  | **vista enhancer** | **not enhancer** | **Total** |
| --- | --- | --- | --- |
| Regions on array | 1023 | 370911 | 371934 |
| VMR-CpGs | 3 | 1420 | 1423 |
|  | 0.5501393 |  |  |
| VMR-CpGs best explained by genotype model | 0 | 362 | 362 |
| P-value | 0.631212 |  |  |
| VMR-CpGs best explained by GXE models | 3 | 1058 | 1061 |
| p-value | 0.334411 |  |  |
