# Supplementary material for: The effect of genotype and in utero environment on interindividual variation in neonate DNA methylomes
Source: HighWire-hosted journal article supplement (doi:10.1101/gr.171439.113), 2014-04-07
Supplement: Supplemental_Tables_6-10.xlsx [file Supplemental_Tables_6-10.xlsx]

## Sheet: table6_meth~G+gender
Supplemental table 6 – SNP and CpG pairs best explained by Gene and GxE models with gene annotation
CpG	label	CpG_Chr	CpG_MAPINFO	CpG_GeneSymbol	Best_Genotype	SNP_Chr	SNP_position	SNP_GeneSymbol
cg07197230	Winning model is Meth ~ G + gender	22	17956641	CECR2	rs17008835	1	220979429	Marc1
cg01324343	Winning model is Meth ~ G + gender	3	183735012	ABCC5;ABCC5	rs4148564	3	183725982	ABCC5; ABCC5-AS1
cg27200895	Winning model is Meth ~ G + gender	4	7763703	AFAP1;AFAP1;LOC84740	rs2269850	4	7763761	AFAP1-AS1; AFAP1
cg09354264	Winning model is Meth ~ G + gender	2	236586347	AGAP1;AGAP1	rs12472001	2	236587761	AGAP1
cg09084391	Winning model is Meth ~ G + gender	5	346247	AHRR	rs1877840	5	374748	AHRR
cg04434244	Winning model is Meth ~ G + gender	6	166232960		rs4709988	6	166231777	AK090688
cg16070743	Winning model is Meth ~ G + gender	4	178364207	AGA	rs6823035	4	178394279	AK094945
cg03072692	Winning model is Meth ~ G + gender	2	3128984		rs1078821	2	3128923	AK095310
cg00812009	Winning model is Meth ~ G + gender	4	175135765		rs4695914	4	175135244	AK125257
cg10751382	Winning model is Meth ~ G + gender	19	50391554	TBC1D17;TBC1D17	rs4802634	19	50377757	AKT1S1
cg09555818	Winning model is Meth ~ G + gender	19	45449301	APOC2;APOC2	rs2288911	19	45449284	APOC4-APOC2
cg24166916	Winning model is Meth ~ G + gender	5	78282669	ARSB;ARSB	rs163126	5	78282249	ARSB
cg07454742	Winning model is Meth ~ G + gender	17	42254645	ASB16;C17orf65	rs3826412	17	42255097	ASB16; ASB16-AS1
cg18865685	Winning model is Meth ~ G + gender	1	177001903	ASTN1;ASTN1	rs16850689	1	177015606	ASTN1
cg09015433	Winning model is Meth ~ G + gender	8	57359970	PENK;PENK	rs2609997	8	57360485	AX747062
cg18375707	Winning model is Meth ~ G + gender	11	64034959	PLCB3	rs11231735	11	64039998	BAD
cg12744031	Winning model is Meth ~ G + gender	7	158751184		rs12001760	9	109004346	BC039487
cg05565442	Winning model is Meth ~ G + gender	12	58011856		rs1038914	12	58011066	BC073932
cg13573513	Winning model is Meth ~ G + gender	12	14996143	ART4;ART4	rs7187482	16	5645810	BC108660
cg25597117	Winning model is Meth ~ G + gender	1	161349116		rs1133805	1	161334658	C1orf192
cg18173726	Winning model is Meth ~ G + gender	15	95713100		rs12631566	3	54267473	CACNA2D3
cg03904042	Winning model is Meth ~ G + gender	20	32255491	NECAB3;NECAB3;C20orf134	rs6088244	20	32110204	CBFA2T2
cg05579598	Winning model is Meth ~ G + gender	16	88989069	CBFA2T3;CBFA2T3	rs1673932	16	88987861	CBFA2T3
cg00825967	Winning model is Meth ~ G + gender	16	88990454	CBFA2T3;CBFA2T3	rs488251	16	88972554	CBFA2T3
cg08072862	Winning model is Meth ~ G + gender	12	113587240	CCDC42B	rs7959803	12	113588131	CCDC42B
cg20544552	Winning model is Meth ~ G + gender	11	85393693		rs290186	11	85395652	CCDC89
cg05843457	Winning model is Meth ~ G + gender	1	158147849		rs3754471	1	158150119	CD1D
cg10106388	Winning model is Meth ~ G + gender	1	160832662	CD244;CD244;CD244;CD244;CD244;CD244	rs12036607	1	160832646	CD244
cg07869907	Winning model is Meth ~ G + gender	20	44839187	CDH22	rs2425792	20	44853673	CDH22
cg16807687	Winning model is Meth ~ G + gender	10	85974018	PCDH21	rs1059341	10	85976965	CDHR1
cg24435209	Winning model is Meth ~ G + gender	22	17640972	CECR5;CECR4;CECR4;CECR5	rs5994180	22	17634050	CECR5
cg20651758	Winning model is Meth ~ G + gender	15	93425245		rs17648415	15	93460991	CHD2
cg12469381	Winning model is Meth ~ G + gender	7	29519297	CHN2;CHN2	rs3812328	7	29517436	CHN2
cg21238276	Winning model is Meth ~ G + gender	9	80849800	CEP78;CEP78	rs10925994	1	240015308	CHRM3
cg09676794	Winning model is Meth ~ G + gender	13	100310162	CLYBL	rs1107450	13	100310109	CLYBL
cg12089079	Winning model is Meth ~ G + gender	13	47470350	HTR2A;HTR2A	rs10953342	7	101113729	COL26A1
cg16087541	Winning model is Meth ~ G + gender	7	115862648	TES;TES	rs10953342	7	101113729	COL26A1
cg11043571	Winning model is Meth ~ G + gender	4	166301076	CPE	rs1530042	4	166389558	CPE
cg03719428	Winning model is Meth ~ G + gender	12	54376094		rs12361365	11	68591872	CPT1A
cg14318858	Winning model is Meth ~ G + gender	19	50204862	CPT1C;CPT1C	rs12981033	19	50197406	CPT1C
cg02616558	Winning model is Meth ~ G + gender	8	3100413	CSMD1	rs1020347	8	3101584	CSMD1
cg09545109	Winning model is Meth ~ G + gender	3	50388910	TUSC4;CYB561D2	rs2233474	3	50388607	CYB561D2
cg04880091	Winning model is Meth ~ G + gender	8	43132451		rs197110	1	57648776	DAB1
cg09160955	Winning model is Meth ~ G + gender	15	89154092	MIR7-2	rs1440125	15	89077679	DET1
cg24324837	Winning model is Meth ~ G + gender	19	49891574	CCDC155;CCDC155	rs2303759	19	49869051	DKKL1
cg08551532	Winning model is Meth ~ G + gender	19	39998270	DLL3;DLL3	rs2304214	19	39996027	DLL3
cg00290607	Winning model is Meth ~ G + gender	11	67383545		rs4148959	11	67381110	DOC2GP
cg24690094	Winning model is Meth ~ G + gender	11	67383802		rs4148959	11	67381110	DOC2GP
cg25809290	Winning model is Meth ~ G + gender	2	223156901	PAX3;PAX3;PAX3;PAX3;PAX3;PAX3	rs6597423	7	154553766	DPP6
cg07956003	Winning model is Meth ~ G + gender	7	95433460	DYNC1I1;DYNC1I1;DYNC1I1	rs2690295	7	95443892	DYNC1I1
cg01081584	Winning model is Meth ~ G + gender	15	40268610	EIF2AK4	rs16970112	15	40271935	EIF2AK4
cg07100532	Winning model is Meth ~ G + gender	18	713085	ENOSF1;ENOSF1;ENOSF1	rs2847602	18	694206	ENOSF1
cg20598457	Winning model is Meth ~ G + gender	14	103576399	C14orf73	rs944002	14	103572815	EXOC3L4
cg26594335	Winning model is Meth ~ G + gender	5	76010472	F2R	rs27135	5	76012843	F2R
cg02112183	Winning model is Meth ~ G + gender	6	170754881		rs9356590	6	170631403	FAM120B
cg15525848	Winning model is Meth ~ G + gender	5	16509123	FAM134B;FAM134B	rs33685	5	16509336	FAM134B
cg26987645	Winning model is Meth ~ G + gender	1	203320386	FMOD	rs7543148	1	203317162	FMOD
cg02284273	Winning model is Meth ~ G + gender	10	14051679	FRMD4A	rs2457837	10	14051456	FRMD4A
cg22846334	Winning model is Meth ~ G + gender	15	43941042	CATSPER2;CATSPER2;CATSPER2	rs2288296	15	44391572	FRMD5
cg25070075	Winning model is Meth ~ G + gender	15	27083993		rs6576636	15	27083406	GABRB3
cg10559151	Winning model is Meth ~ G + gender	2	121669723	GLI2	rs1992901	2	121670669	GLI2
cg19717773	Winning model is Meth ~ G + gender	7	2847554	GNA12	rs1182206	7	2778069	GNA12
cg01056242	Winning model is Meth ~ G + gender	12	131622739	GPR133	rs884943	12	131622506	GPR133
cg06223162	Winning model is Meth ~ G + gender	1	101003688	GPR88	rs2809823	1	101003762	GPR88
cg24863255	Winning model is Meth ~ G + gender	3	171561069	TMEM212	rs1559157	5	153003764	GRIA1
cg14880184	Winning model is Meth ~ G + gender	18	19758221	GATA6	rs949295	11	120789852	GRIK4
cg19711530	Winning model is Meth ~ G + gender	17	44847427	WNT3	rs2033317	2	26477650	HADHB
cg11251877	Winning model is Meth ~ G + gender	6	168398981		rs3778667	6	168395957	HGC6.1.1
cg08762424	Winning model is Meth ~ G + gender	6	31275881		rs9368673	6	31271757	HLA-B
cg22037249	Winning model is Meth ~ G + gender	6	33037690	HLA-DPA1	rs2301220	6	33038766	HLA-DPA1
cg10714510	Winning model is Meth ~ G + gender	6	32729465	HLA-DQB2	rs4947347	6	32729359	HLA-DQB2
cg17863743	Winning model is Meth ~ G + gender	10	100993587	HPSE2;HPSE2;HPSE2;HPSE2	rs10786518	10	100964452	HPSE2
cg24926711	Winning model is Meth ~ G + gender	10	100993662	HPSE2;HPSE2;HPSE2;HPSE2	rs10786518	10	100964452	HPSE2
cg26067760	Winning model is Meth ~ G + gender	10	100996825	HPSE2;HPSE2;HPSE2;HPSE2	rs10786518	10	100964452	HPSE2
cg08085267	Winning model is Meth ~ G + gender	17	45401833	C17orf57	rs7225700	17	45391804	ITGB3
cg27196467	Winning model is Meth ~ G + gender	4	21305490	KCNIP4;KCNIP4;KCNIP4;KCNIP4	rs1425339	4	21300290	KCNIP4
cg15127791	Winning model is Meth ~ G + gender	11	128729883	KCNJ1;KCNJ1;KCNJ1;KCNJ1	rs7925428	11	128724209	KCNJ1
cg12090740	Winning model is Meth ~ G + gender	18	60988058	BCL2;BCL2	rs439670	18	61024122	KDSR
cg25108548	Winning model is Meth ~ G + gender	12	13196954	KIAA1467	rs1463623	12	13199248	KIAA1467
cg14023239	Winning model is Meth ~ G + gender	3	183209713	KLHL6	rs7644322	3	183208737	KLHL6
cg14483935	Winning model is Meth ~ G + gender	12	49526778	TUBA1B	rs17638880	3	45507779	LARS2
cg15652532	Winning model is Meth ~ G + gender	2	30669759	LCLAT1;LCLAT1	rs1662955	2	30670973	LCLAT1
cg17120273	Winning model is Meth ~ G + gender	10	88428026	LDB3;LDB3;LDB3;LDB3;LDB3;LDB3	rs11202121	10	88432328	LDB3
cg17588350	Winning model is Meth ~ G + gender	11	60414689	C11orf64	rs1994457	11	60387600	LINC00301
cg16298927	Winning model is Meth ~ G + gender	6	170191076	C6orf122;C6orf208	rs3800550	6	170190659	LINC00574; LINC00242
cg06679270	Winning model is Meth ~ G + gender	15	101084980	LASS3	rs3764198	15	101110565	LINS
cg10909185	Winning model is Meth ~ G + gender	11	75139736	KLHL35	rs17329485	5	9549386	LOC100505806
cg21385746	Winning model is Meth ~ G + gender	2	105118572	LOC150568	rs12987646	2	105115341	LOC150568
cg27639408	Winning model is Meth ~ G + gender	4	155662375		rs201824	4	155668710	LRAT; DQ266889
cg21885112	Winning model is Meth ~ G + gender	7	150026567	C7orf29;LRRC61;LRRC61	rs10952250	7	150025966	LRRC61
cg15833099	Winning model is Meth ~ G + gender	2	133402999	GPR39;LYPD1;LYPD1	rs713535	2	133413724	LYPD1
cg20512947	Winning model is Meth ~ G + gender	2	242889340		rs6131691	20	15720528	MACROD2
cg03716984	Winning model is Meth ~ G + gender	10	54538505		rs1838065	10	54529257	MBL2
cg09831081	Winning model is Meth ~ G + gender	21	47647568	LSS;LSS;LSS;LSS	rs2250213	21	47674275	MCM3AP
cg08004073	Winning model is Meth ~ G + gender	3	169377725	MECOM	rs16854200	3	169332157	MECOM
cg04383383	Winning model is Meth ~ G + gender	19	310430	MIER2	rs8100665	19	311037	MIER2
cg06680906	Winning model is Meth ~ G + gender	15	69325560	MIR548H4;NOX5	rs311889	15	69327825	MIR548H4; NOX5
cg20194973	Winning model is Meth ~ G + gender	22	50524676	MLC1;MLC1	rs4838816	22	50517329	MLC1
cg24046411	Winning model is Meth ~ G + gender	16	88717646	CYBA	rs9932581	16	88718353	MVD
cg21862353	Winning model is Meth ~ G + gender	2	1801628	MYT1L	rs13006826	2	1806879	MYT1L
cg01630362	Winning model is Meth ~ G + gender	11	71163528	NADSYN1	rs12800438	11	71171003	NADSYN1
cg12123879	Winning model is Meth ~ G + gender	19	55417361	NCR1;NCR1;NCR1;NCR1;NCR1	rs1433097	19	55418458	NCR1
cg05333442	Winning model is Meth ~ G + gender	16	58533743	NDRG4;NDRG4;NDRG4	rs2432560	16	58533709	NDRG4
cg11117878	Winning model is Meth ~ G + gender	7	35294949	TBX20;TBX20	rs12418446	11	21109584	NELL1
cg06499262	Winning model is Meth ~ G + gender	16	69598417	NFAT5;NFAT5;NFAT5;NFAT5;NFAT5	rs4633710	16	69632961	NFAT5
cg16890051	Winning model is Meth ~ G + gender	15	37175029	LOC145845	rs6748986	2	233839239	NGEF
cg15962969	Winning model is Meth ~ G + gender	6	138866887	NHSL1	rs4131177	6	138872074	NHSL1
cg01201512	Winning model is Meth ~ G + gender	12	740338	NINJ2	rs2535392	12	711646	NINJ2
cg07442907	Winning model is Meth ~ G + gender	17	5487958	NLRP1;NLRP1;NLRP1;NLRP1;NLRP1	rs961826	17	5483937	NLRP1
cg19981409	Winning model is Meth ~ G + gender	11	89225042	NOX4;NOX4;NOX4;NOX4	rs596542	11	89221812	NOX4
cg08180572	Winning model is Meth ~ G + gender	16	28985143	SPNS1;SPNS1;SPNS1;SPNS1;SPNS1	rs1131543	16	28997997	NPIPL1; LAT
cg03199564	Winning model is Meth ~ G + gender	4	5021084	CYTL1	rs11740452	5	32770750	NPR3
cg18596369	Winning model is Meth ~ G + gender	19	5822318	NRTN	rs3763046	19	5823903	NRTN
cg23759189	Winning model is Meth ~ G + gender	11	131410868	NTM	rs318981	11	131413833	NTM
cg20142501	Winning model is Meth ~ G + gender	17	791118	NXN	rs2457270	17	791338	NXN
cg27183173	Winning model is Meth ~ G + gender	19	728040	PALM;PALM	rs3787017	19	725939	PALM
cg11077631	Winning model is Meth ~ G + gender	22	50617003	PANX2;PANX2;PANX2	rs5771204	22	50614476	PANX2
cg03292743	Winning model is Meth ~ G + gender	2	74642838	C2orf81	rs2240442	2	74733773	PCGF1
cg00437048	Winning model is Meth ~ G + gender	10	3162191	PFKP	rs11251728	10	3163452	PFKP
cg06242242	Winning model is Meth ~ G + gender	7	766104	PRKAR1B;PRKAR1B;PRKAR1B;HEATR2	rs4724821	7	762544	PRKAR1B
cg26097573	Winning model is Meth ~ G + gender	20	4721490	PRNT;PRNT;PRNT	rs2249483	20	4719176	PRNT
cg06096336	Winning model is Meth ~ G + gender	2	231989800	PSMD1;HTR2B;HTR2B	rs10187149	2	231990371	PSMD1
cg07899997	Winning model is Meth ~ G + gender	12	85671892		rs12685303	9	9052964	PTPRD
cg25449441	Winning model is Meth ~ G + gender	7	157644471	PTPRN2;PTPRN2;PTPRN2	rs1000137	7	157644152	PTPRN2
cg11072645	Winning model is Meth ~ G + gender	7	157754746	PTPRN2;PTPRN2;PTPRN2	rs4716828	7	157747326	PTPRN2
cg07989221	Winning model is Meth ~ G + gender	16	86231948		rs9364689	6	163929340	QKI
cg04044224	Winning model is Meth ~ G + gender	2	238499793	RAB17	rs2292871	2	238499690	RAB17
cg07917150	Winning model is Meth ~ G + gender	7	27154264	HOXA3;HOXA3;HOXA3	rs256296	5	34679959	RAI14
cg01579024	Winning model is Meth ~ G + gender	5	170288757	RANBP17	rs10051958	5	170394572	RANBP17
cg14234152	Winning model is Meth ~ G + gender	2	173601413	RAPGEF4;LOC91149	rs1349499	2	173592268	RAPGEF4-AS1
cg08223357	Winning model is Meth ~ G + gender	17	77302162	HRNBP3	rs897594	17	77303002	RBFOX3
cg17848838	Winning model is Meth ~ G + gender	20	43379406	KCNK15	rs1980577	20	43382112	RIMS4
cg21964662	Winning model is Meth ~ G + gender	13	79234715	RNF219	rs12585725	13	79220899	RNF219
cg09929238	Winning model is Meth ~ G + gender	17	78560916	RPTOR;RPTOR	rs12600592	17	78559726	RPTOR
cg04789650	Winning model is Meth ~ G + gender	17	78892295	RPTOR;RPTOR	rs4969227	17	78900598	RPTOR
cg01624414	Winning model is Meth ~ G + gender	4	77119206	SCARB2	rs11946079	4	77105700	SCARB2
cg08952407	Winning model is Meth ~ G + gender	5	42756860	CCDC152	rs1035516	5	42823799	SEPP1
cg04063615	Winning model is Meth ~ G + gender	12	132293388		rs4964988	12	132217770	SFSWAP
cg17723143	Winning model is Meth ~ G + gender	5	148033473	HTR4;HTR4;HTR4;HTR4;HTR4;HTR4;HTR4	rs1465405	5	148116202	SH3TC2
cg23015118	Winning model is Meth ~ G + gender	1	2232527	SKI	rs12562937	1	2229478	SKI
cg03220363	Winning model is Meth ~ G + gender	8	134115661	TG;SLA;SLA	rs4443645	8	134105321	SLA; TG
cg22025206	Winning model is Meth ~ G + gender	5	502436	SLC9A3	rs4957044	5	499071	SLC9A3
cg24135491	Winning model is Meth ~ G + gender	17	4487099	SMTNL2;SMTNL2	rs2100987	17	4494073	SMTNL2
cg27010159	Winning model is Meth ~ G + gender	12	119591747	SRRM4	rs11064685	12	119590881	SRRM4
cg14741143	Winning model is Meth ~ G + gender	3	156273315	SSR3	rs12631297	3	156268070	SSR3
cg21881798	Winning model is Meth ~ G + gender	11	8931708	C11orf17;C11orf17;ST5	rs2653557	11	8901895	ST5
cg26872028	Winning model is Meth ~ G + gender	5	100240223	ST8SIA4;ST8SIA4	rs1428439	5	100238801	ST8SIA4
cg20527831	Winning model is Meth ~ G + gender	12	131272906		rs2001483	12	131318645	STX2
cg15787636	Winning model is Meth ~ G + gender	17	80866113	TBCD	rs9747334	17	80840989	TBCD
cg01895557	Winning model is Meth ~ G + gender	5	167285561	ODZ2	rs2973656	5	167280392	TENM2
cg06694381	Winning model is Meth ~ G + gender	6	155569200	TIAM2;TIAM2	rs3011906	6	155568881	TIAM2
cg22352450	Winning model is Meth ~ G + gender	13	114187104	TMCO3	rs6577052	13	114182660	TMCO3
cg20814179	Winning model is Meth ~ G + gender	4	940893	TMEM175	rs2290403	4	942006	TMEM175
cg02624284	Winning model is Meth ~ G + gender	3	194319725	TMEM44;TMEM44;TMEM44;TMEM44	rs6768028	3	194324939	TMEM44
cg14001023	Winning model is Meth ~ G + gender	19	46526321	PGLYRP1;PGLYRP1	rs9300190	12	29656309	TMTC1
cg03422583	Winning model is Meth ~ G + gender	22	50630972	TRABD	rs738338	22	50625800	TRABD
cg21932934	Winning model is Meth ~ G + gender	11	120039306		rs666432	11	120003533	TRIM29
cg13902645	Winning model is Meth ~ G + gender	11	5959945		rs10769353	11	5954809	TRIM5
cg18770446	Winning model is Meth ~ G + gender	1	1109983	TTLL10	rs11260542	1	1110019	TTLL10; AK128833
cg10069155	Winning model is Meth ~ G + gender	15	41852638	TYRO3	rs2277537	15	41857080	TYRO3
cg27469738	Winning model is Meth ~ G + gender	10	99338074	ANKRD2;ANKRD2	rs10882959	10	99304801	UBTD1
cg02489157	Winning model is Meth ~ G + gender	21	43529162	UMODL1;UMODL1;C21orf128	rs220110	21	43522650	UMODL1; C21orf128
cg21171339	Winning model is Meth ~ G + gender	9	79791169	VPS13A;VPS13A;VPS13A;VPS13A	rs1054368	9	79791793	VPS13A-AS1
cg24389034	Winning model is Meth ~ G + gender	6	169977608	WDR27	rs9295006	6	169974663	WDR27
cg13013900	Winning model is Meth ~ G + gender	17	6659326	XAF1;XAF1;XAF1;XAF1	rs955461	17	6658969	XAF1
cg03972071	Winning model is Meth ~ G + gender	18	72917163	ZADH2	rs1866730	18	72920103	ZADH2
cg25498107	Winning model is Meth ~ G + gender	15	41100233	DNAJC17;ZFYVE19	rs3743034	15	41101145	ZFYVE19
cg15454820	Winning model is Meth ~ G + gender	10	96990858		rs7042481	9	97064273	ZNF169
cg03995300	Winning model is Meth ~ G + gender	17	5019989	ZNF232	rs6502844	17	5019668	ZNF232
cg26181818	Winning model is Meth ~ G + gender	2	233323935	ALPI	rs2749592	10	38258842	ZNF25
cg03189184	Winning model is Meth ~ G + gender	4	4858752		rs13298	18	32831386	ZNF397; ZSCAN30
cg09169779	Winning model is Meth ~ G + gender	13	20751710		rs1896642	19	52977019	ZNF578
cg01426303	Winning model is Meth ~ G + gender	1	227962723	SNAP47	rs12096675	1	227839384	ZNF678
cg20433858	Winning model is Meth ~ G + gender	1	248101009	OR2L13	exm167259	1	248129240
cg10589385	Winning model is Meth ~ G + gender	1	150898437	SETDB1;SETDB1;SETDB1	exm95403	1	150935173
cg08870646	Winning model is Meth ~ G + gender	1	41350183		rs10158668	1	41351613
cg13556452	Winning model is Meth ~ G + gender	1	2391241		rs10910078	1	2390588
cg00698771	Winning model is Meth ~ G + gender	1	113285940		rs12033013	1	113290694
cg24920358	Winning model is Meth ~ G + gender	1	40204285	PPIE;PPIE;PPIE	rs12074147	1	40203722
cg13556548	Winning model is Meth ~ G + gender	1	226187876	C1orf55	rs12735124	1	226209787
cg25978208	Winning model is Meth ~ G + gender	15	25093244	SNRPN;SNRPN;SNRPN	rs1539144	1	203372186
cg18564464	Winning model is Meth ~ G + gender	1	46937902		rs2031247	1	46938837
cg17039022	Winning model is Meth ~ G + gender	1	203595145	ATP2B4;ATP2B4	rs4245719	1	203595146
cg09134876	Winning model is Meth ~ G + gender	1	53600889	SLC1A7	rs7556421	1	53619482
cg02683114	Winning model is Meth ~ G + gender	2	24398427	C2orf84	exm176676	2	24390517
cg09336323	Winning model is Meth ~ G + gender	2	210074276		rs10932287	2	210083966
cg09352518	Winning model is Meth ~ G + gender	19	21265421	ZNF714	rs11887431	2	42267462
cg21202759	Winning model is Meth ~ G + gender	2	241085043		rs13028057	2	241085044
cg13053653	Winning model is Meth ~ G + gender	2	177037631	HOXD3	rs1348807	2	177005757
cg24680439	Winning model is Meth ~ G + gender	10	134778467		rs1477499	2	181470838
cg05308317	Winning model is Meth ~ G + gender	14	102053958		rs1596111	2	154609331
cg03964554	Winning model is Meth ~ G + gender	17	59521084		rs17031450	2	66303200
cg17256711	Winning model is Meth ~ G + gender	6	154331078	OPRM1;OPRM1;OPRM1	rs17233751	2	174714533
cg02488702	Winning model is Meth ~ G + gender	2	142889392	LRP1B	rs4146077	2	143356687
cg07563363	Winning model is Meth ~ G + gender	2	154143677		rs4410241	2	154143853
cg19729930	Winning model is Meth ~ G + gender	2	74357872		rs4452177	2	74345206
cg25730564	Winning model is Meth ~ G + gender	2	236100751		rs4663553	2	236100852
cg10075506	Winning model is Meth ~ G + gender	2	1817351	MYT1L	rs6751762	2	1787933
cg02473600	Winning model is Meth ~ G + gender	2	128173750		rs878461	2	128173417
cg06609094	Winning model is Meth ~ G + gender	4	175132842		exm2269702	3	197195013
cg20892840	Winning model is Meth ~ G + gender	3	156879058	CCNL1	rs10936063	3	156880883
cg19597498	Winning model is Meth ~ G + gender	3	96495651		rs2318166	3	96479016
cg06635871	Winning model is Meth ~ G + gender	12	7863853	DPPA3	rs4679547	3	59389870
cg11144056	Winning model is Meth ~ G + gender	17	1957410	HIC1	rs4679547	3	59389870
cg14964336	Winning model is Meth ~ G + gender	4	1523275		rs11947258	4	1519322
cg11174255	Winning model is Meth ~ G + gender	4	1513259		rs12647020	4	1507198
cg24818200	Winning model is Meth ~ G + gender	5	140501365	PCDHB4	rs13134303	4	35105267
cg00146756	Winning model is Meth ~ G + gender	4	6729110		rs4420983	4	6733659
cg14323984	Winning model is Meth ~ G + gender	4	6695203	S100P	rs4645287	4	6694778
cg15205559	Winning model is Meth ~ G + gender	4	188736172		rs6829286	4	188735086
cg16763089	Winning model is Meth ~ G + gender	20	5485284	LOC149837	rs7679576	4	12938795
cg24367840	Winning model is Meth ~ G + gender	2	162197869	PSMD14	rs10477678	5	127260499
cg08422420	Winning model is Meth ~ G + gender	5	1594733	SDHAP3	rs1106136	5	1659414
cg08347626	Winning model is Meth ~ G + gender	5	1850140		rs12188301	5	1847639
cg11527001	Winning model is Meth ~ G + gender	5	143978357		rs165463	5	144013825
cg12908908	Winning model is Meth ~ G + gender	5	31106255		rs17674109	5	31106256
cg00335715	Winning model is Meth ~ G + gender	5	90575459		rs1858309	5	90556558
cg06584218	Winning model is Meth ~ G + gender	5	2643172		rs323653	5	2640466
cg00128057	Winning model is Meth ~ G + gender	5	38134954		rs3812048	5	38135718
cg21544219	Winning model is Meth ~ G + gender	5	566410		rs3853657	5	567246
cg09790628	Winning model is Meth ~ G + gender	5	1100385	SLC12A7	rs4076818	5	1134914
cg04111992	Winning model is Meth ~ G + gender	7	158790115		rs609071	5	18092224
cg12742338	Winning model is Meth ~ G + gender	21	36042464	CLIC6	rs904734	5	1661397
cg03031988	Winning model is Meth ~ G + gender	6	31510729	BAT1;BAT1	exm-rs2239528	6	31510105
cg07905975	Winning model is Meth ~ G + gender	6	33288366	DAXX;DAXX;DAXX;DAXX	exm-rs2239839	6	33288075
cg06643013	Winning model is Meth ~ G + gender	6	134217242		exm-rs2327429	6	134209837
cg25637655	Winning model is Meth ~ G + gender	6	29911542	HLA-A	exm-rs2734905	6	29904929
cg17598552	Winning model is Meth ~ G + gender	6	31094068	PSORS1C1	exm-rs3130991	6	31087354
cg03030317	Winning model is Meth ~ G + gender	6	31164924	HCG27	exm-rs4122189	6	31167927
cg15947697	Winning model is Meth ~ G + gender	6	31146583	PSORS1C3	exm-rs915660_ver3	6	31143835
cg24735489	Winning model is Meth ~ G + gender	6	31088352	CDSN;PSORS1C1	exm529718	6	31083813
cg11468993	Winning model is Meth ~ G + gender	6	31082939	CDSN;PSORS1C1	exm529738	6	31084170
cg22984282	Winning model is Meth ~ G + gender	6	32632568	HLA-DQB1	exm536445	6	32634306
cg26504835	Winning model is Meth ~ G + gender	6	31143710	PSORS1C3	rs1052989	6	31146403
cg03051777	Winning model is Meth ~ G + gender	12	115131789		rs10944562	6	92823967
cg24138857	Winning model is Meth ~ G + gender	6	32055079	TNXB	rs11962960	6	156461430
cg10156077	Winning model is Meth ~ G + gender	6	168556724		rs1871431	6	168559038
cg02753903	Winning model is Meth ~ G + gender	19	38943525	RYR1;RYR1	rs2747421	6	29645118
cg06032337	Winning model is Meth ~ G + gender	6	29648468		rs3094736	6	29662374
cg07365741	Winning model is Meth ~ G + gender	6	170478434		rs4540249	6	170492449
cg21062780	Winning model is Meth ~ G + gender	6	887772		rs4960397	6	887977
cg26371345	Winning model is Meth ~ G + gender	6	44090748	MRPL14	rs6458368	6	44051221
cg01982166	Winning model is Meth ~ G + gender	6	31148606		rs6937752	6	31148606
cg06515328	Winning model is Meth ~ G + gender	6	168559503		rs9346527	6	168564920
cg12256206	Winning model is Meth ~ G + gender	6	168719708	DACT2	rs9346527	6	168564920
cg04736217	Winning model is Meth ~ G + gender	6	31804461	C6orf48;C6orf48;SNORD52	rs9368700	6	31802684
cg06084579	Winning model is Meth ~ G + gender	6	27706179		rs9468213	6	27706180
cg25985355	Winning model is Meth ~ G + gender	7	65971099		exm2264241	7	65938980
cg00959259	Winning model is Meth ~ G + gender	3	122281975	PARP9;PARP9;DTX3L;PARP9;PARP9;PARP9;PARP9	rs10499481	7	17116201
cg24419391	Winning model is Meth ~ G + gender	7	73183516	CLDN3;CLDN3	rs6460055	7	73187517
cg06464775	Winning model is Meth ~ G + gender	7	151145235		rs6464142	7	151140431
cg09301498	Winning model is Meth ~ G + gender	7	57324701		rs7349954	7	57330502
cg06963709	Winning model is Meth ~ G + gender	7	155150793		rs7798126	7	155153490
cg04527761	Winning model is Meth ~ G + gender	7	194861	FAM20C	rs7803082	7	176270
cg01219135	Winning model is Meth ~ G + gender	7	158766336		rs7809017	7	158759063
cg04690927	Winning model is Meth ~ G + gender	7	45961524	IGFBP3;IGFBP3	rs924140	7	45963114
cg12244052	Winning model is Meth ~ G + gender	7	45961469	IGFBP3;IGFBP3	rs924140	7	45963114
cg06484146	Winning model is Meth ~ G + gender	7	12443880	VWDE	rs9639128	7	12444157
cg27134251	Winning model is Meth ~ G + gender	8	1365049		rs1019024	8	1363967
cg24536782	Winning model is Meth ~ G + gender	8	216659		rs11995670	8	223682
cg15671083	Winning model is Meth ~ G + gender	10	5406959	UCN3	rs12677456	8	8832086
cg11919837	Winning model is Meth ~ G + gender	8	57350735		rs13262975	8	57352136
cg19413350	Winning model is Meth ~ G + gender	8	57351067		rs13262975	8	57352136
cg14222434	Winning model is Meth ~ G + gender	6	166051228	PDE10A;PDE10A	rs13280188	8	112340385
cg06596654	Winning model is Meth ~ G + gender	16	86527923		rs1603363	8	107031319
cg00191178	Winning model is Meth ~ G + gender	3	74663024		rs962157	8	136941348
cg01412970	Winning model is Meth ~ G + gender	17	17109239	PLD6	rs1329719	9	18387361
cg18514705	Winning model is Meth ~ G + gender	19	44330665	ZNF283	rs2066151	9	18430297
cg10486974	Winning model is Meth ~ G + gender	6	34499389	PACSIN1	rs726657	9	117696336
cg02848996	Winning model is Meth ~ G + gender	10	1209463	NCRNA00200	exm2266952	10	1207809
cg03928431	Winning model is Meth ~ G + gender	10	15018005		exm2266964	10	15003278
cg02174092	Winning model is Meth ~ G + gender	10	43846539		rs11814409	10	43852721
cg19573236	Winning model is Meth ~ G + gender	10	65733388		rs1916463	10	65694772
cg15057747	Winning model is Meth ~ G + gender	10	1205673	NCRNA00200	rs4310544	10	1195959
cg06485032	Winning model is Meth ~ G + gender	13	22615064		rs6415964	10	18381086
cg27523644	Winning model is Meth ~ G + gender	10	131214244		rs7099267	10	131212448
cg16087940	Winning model is Meth ~ G + gender	10	129947807		rs954650	10	129941513
cg14140118	Winning model is Meth ~ G + gender	11	108423031	EXPH5;EXPH5	exm2259690_ver4	11	108429200
cg20737388	Winning model is Meth ~ G + gender	11	73668626	DNAJB13	exm2271521	11	73668842
cg22916017	Winning model is Meth ~ G + gender	11	64110731	CCDC88B	exm922500	11	64109118
cg02613300	Winning model is Meth ~ G + gender	11	123776728	OR8D4	exm965426	11	123777412
cg25478299	Winning model is Meth ~ G + gender	11	102638669		rs10791595	11	102635501
cg10486069	Winning model is Meth ~ G + gender	11	133658113		rs12795042	11	133658168
cg17534999	Winning model is Meth ~ G + gender	11	126872615		rs1939228	11	126887637
cg22728830	Winning model is Meth ~ G + gender	11	58667964		rs2156349	11	58668565
cg05651243	Winning model is Meth ~ G + gender	11	134527018		rs3019665	11	134525634
cg04027043	Winning model is Meth ~ G + gender	11	8378791		rs4758350	11	8378655
cg24950233	Winning model is Meth ~ G + gender	4	174457944	NBLA00301	rs7120142	11	103417781
cg01407861	Winning model is Meth ~ G + gender	11	12307496	MICALCL	rs7947131	11	12301823
cg19623012	Winning model is Meth ~ G + gender	11	116371330		rs925151	11	116369171
cg22841866	Winning model is Meth ~ G + gender	12	58013174	SLC26A10	exm1017174	12	58015494
cg08184159	Winning model is Meth ~ G + gender	12	114837108	TBX5;TBX5;TBX5;TBX5	rs10774740	12	114666202
cg13380890	Winning model is Meth ~ G + gender	12	76414534		rs10785223	12	76409990
cg17153082	Winning model is Meth ~ G + gender	20	3145597	ProSAPiP1	rs11176566	12	67472631
cg02554168	Winning model is Meth ~ G + gender	12	55378621	KIAA0748	rs2087248	12	55393528
cg20922821	Winning model is Meth ~ G + gender	12	94070578	CRADD	rs2304439	12	94070990
cg25345738	Winning model is Meth ~ G + gender	12	108078835	PWP1	rs4964607	12	108073695
cg15812020	Winning model is Meth ~ G + gender	13	25506235	LOC646405	exm1058344	13	25424583
cg22717525	Winning model is Meth ~ G + gender	13	37680829	CSNK1A1L	exm1063866	13	37679268
cg17759252	Winning model is Meth ~ G + gender	19	18888081	CRTC1;CRTC1	rs12100069	13	74098915
cg06614754	Winning model is Meth ~ G + gender	13	107569395		rs1556237	13	107562307
cg05124117	Winning model is Meth ~ G + gender	13	107568872		rs16969412	13	107578686
cg10719522	Winning model is Meth ~ G + gender	13	28562841	PRHOXNB	rs3897927	13	28562901
cg00290086	Winning model is Meth ~ G + gender	9	1050903	DMRT2;DMRT2;DMRT2	rs9529782	13	71155658
cg08801017	Winning model is Meth ~ G + gender	13	19918525	LOC100101938	rs9551113	13	25120453
cg12584960	Winning model is Meth ~ G + gender	13	114965839		rs9562153	13	114977582
cg19170807	Winning model is Meth ~ G + gender	13	113001348		rs9577340	13	113002603
cg20956390	Winning model is Meth ~ G + gender	14	104734475		rs10143250	14	104723433
cg23936410	Winning model is Meth ~ G + gender	14	104808516		rs11160804	14	104792254
cg15924568	Winning model is Meth ~ G + gender	14	103687675		rs1190194	14	103690846
cg07282058	Winning model is Meth ~ G + gender	16	86232315		rs17103360	14	75959341
cg05458052	Winning model is Meth ~ G + gender	8	102503892	GRHL2	rs17108728	14	39475193
cg11121623	Winning model is Meth ~ G + gender	14	56586572	PELI2	rs241552	14	56548918
cg16050468	Winning model is Meth ~ G + gender	14	105011965		rs4983599	14	105011436
cg00263248	Winning model is Meth ~ G + gender	14	98444151	C14orf64	rs9323989	14	98587669
cg21074766	Winning model is Meth ~ G + gender	15	99069077		rs12914549	15	99065229
cg11747081	Winning model is Meth ~ G + gender	13	76444823		rs1435680	15	36387096
cg17221377	Winning model is Meth ~ G + gender	15	101389272		rs3803438	15	101389356
cg27079322	Winning model is Meth ~ G + gender	17	59530436		rs4514651	15	73121973
cg02649063	Winning model is Meth ~ G + gender	16	55794731	CES4	exm1241669	16	55862691
cg01153376	Winning model is Meth ~ G + gender	16	818807	MSLN;MIR662;MSLN	exm2252768_ver4	16	820622
cg20619695	Winning model is Meth ~ G + gender	6	293331	DUSP22	rs11646696	16	34914397
cg09274344	Winning model is Meth ~ G + gender	16	1078689		rs428233	16	1085393
cg03486986	Winning model is Meth ~ G + gender	13	112986285		rs8058961	16	30809063
cg06052372	Winning model is Meth ~ G + gender	16	83967808		rs9923900	16	83967469
cg04781018	Winning model is Meth ~ G + gender	16	2880105	ZG16B	rs9925556	16	2880105
cg15852150	Winning model is Meth ~ G + gender	12	42875816	PRICKLE1;PRICKLE1;PRICKLE1;PRICKLE1	rs9940468	16	73152874
cg19760250	Winning model is Meth ~ G + gender	17	36997627	C17orf98	exm1315924_ver2	17	36997461
cg20084219	Winning model is Meth ~ G + gender	17	36997449	C17orf98	exm1315924_ver2	17	36997461
cg03115019	Winning model is Meth ~ G + gender	17	80708279	FN3K	exm2253313	17	80708601
cg04068980	Winning model is Meth ~ G + gender	5	50674203		rs10515040	17	51504320
cg08954277	Winning model is Meth ~ G + gender	4	1535673		rs10515040	17	51504320
cg15864601	Winning model is Meth ~ G + gender	17	259839	C17orf97	rs11150882	17	259648
cg26072749	Winning model is Meth ~ G + gender	17	46657274	MIR10A	rs3096644	17	46757575
cg00066239	Winning model is Meth ~ G + gender	17	78472159		rs9898443	17	78469357
cg22550815	Winning model is Meth ~ G + gender	19	11276529	KANK2;KANK2	exm-rs7188	19	11275139
cg03320492	Winning model is Meth ~ G + gender	1	45187810	C1orf228	exm1417660	19	7986638
cg10372770	Winning model is Meth ~ G + gender	19	12377156		exm1430357	19	12384580
cg03635442	Winning model is Meth ~ G + gender	8	49427283		rs11879840	19	21069090
cg26316885	Winning model is Meth ~ G + gender	19	10407317	ICAM5	rs12150978	19	10408318
cg21867110	Winning model is Meth ~ G + gender	19	22700397		rs12609640	19	22697721
cg23504719	Winning model is Meth ~ G + gender	10	99735010	CRTAC1	rs281205	19	22407824
cg23480619	Winning model is Meth ~ G + gender	21	35831871	KCNE1;KCNE1;KCNE1;KCNE1;KCNE1	rs3813591	19	22321256
cg10552523	Winning model is Meth ~ G + gender	11	313478	IFITM1	rs4804735	19	12936190
cg19785066	Winning model is Meth ~ G + gender	20	44746655	CD40;CD40	rs6510064	19	57855930
cg25851651	Winning model is Meth ~ G + gender	19	14939300	OR7A5	rs715159	19	15039519
cg23848712	Winning model is Meth ~ G + gender	20	3022992	GNRH2;GNRH2;GNRH2	exm1520916	20	3025107
cg06514855	Winning model is Meth ~ G + gender	17	21220141		rs218455	20	57209002
cg21519980	Winning model is Meth ~ G + gender	20	61866902	BIRC7;BIRC7	rs6090314	20	61857552
cg25849642	Winning model is Meth ~ G + gender	13	112627458		rs6097591	20	52431502
cg05780180	Winning model is Meth ~ G + gender	20	61732480	HAR1B;HAR1A	rs6122372	20	61739347
cg02118390	Winning model is Meth ~ G + gender	6	167051744	RPS6KA2	rs926607	20	24329074
cg11741189	Winning model is Meth ~ G + gender	11	31843886		rs2825750	21	21062011
cg06324373	Winning model is Meth ~ G + gender	10	99734805	CRTAC1	rs2834549	21	36004539
cg16143149	Winning model is Meth ~ G + gender	21	31710914	KRTAP27-1	rs614118	21	31553413
cg14192299	Winning model is Meth ~ G + gender	19	46417639	NANOS2	rs9637060	21	20250104
cg19380675	Winning model is Meth ~ G + gender	22	32808489	C22orf28	rs2049948	22	32808355
cg17347063	Winning model is Meth ~ G + gender	22	36043021	APOL6	rs5755821	22	36041650
cg16154810	Winning model is Meth ~ G + gender	22	47135258	CERK	rs5769126	22	47135205
cg02443626	Winning model is Meth ~ G + gender	11	44335060		rs5935358	X	12501049
cg05860956	Winning model is Meth ~ G + gender	12	312595	SLC6A12;SLC6A12;SLC6A12	rs17317518	X	78402918
cg01989203	Winning model is Meth ~ G + gender	6	49605296	RHAG	rs2188980	X	114745305

## Sheet: table6_meth~ G+E+GxE+gender
Supplemental table 6 – SNP and CpG pairs best explained by Gene and GxE models with gene annotation
CpG	label	CpG_Chr	CpG_MAPINFO	CpG_GeneSymbol	Best_Genotype	SNP_Chr	SNP_position	SNP_GeneSymbol
cg26227225	Winning model is Meth ~ G + E + GxE + gender	1	2121039	C1orf86;LOC100128003;C1orf86	exm-rs2179965	1	88802012
cg08979191	Winning model is Meth ~ G + E + GxE + gender	5	132113734	SEPT8;SEPT8;SEPT8;SEPT8	rs30523	5	132111043	Sept8
cg09427016	Winning model is Meth ~ G + E + GxE + gender	16	89167018	ACSF3;ACSF3;ACSF3	rs7188200	16		ACSF3
cg17460445	Winning model is Meth ~ G + E + GxE + gender	3	46759588	PRSS50	rs2169076	10	127849127	ADAM12
cg14079463	Winning model is Meth ~ G + E + GxE + gender	6	127796989	C6orf174	rs6939219	6	19177636	AK097585
cg19660531	Winning model is Meth ~ G + E + GxE + gender	12	5937409	ANO2	rs7136836	12	5937354	ANO2
cg23457862	Winning model is Meth ~ G + E + GxE + gender	2	201982439	CFLAR;CFLAR;CFLAR	rs3771686	2	160220164	BAZ2B
cg23981871	Winning model is Meth ~ G + E + GxE + gender	2	177028714	HOXD3	rs4078756	2	177004115	BC047605
cg07658357	Winning model is Meth ~ G + E + GxE + gender	12	114839476	TBX5;TBX5;TBX5;TBX5	rs7187482	16	5645810	BC108660
cg23973272	Winning model is Meth ~ G + E + GxE + gender	8	52322169	PXDNL	rs7823200	8	10547758	C8orf74
cg04388226	Winning model is Meth ~ G + E + GxE + gender	12	128366031		rs2238077	12	2466084	CACNA1C
cg03396347	Winning model is Meth ~ G + E + GxE + gender	1	1875803		rs2247560	1	1846765	CALML6
cg25544384	Winning model is Meth ~ G + E + GxE + gender	13	44000493	ENOX1;ENOX1	rs330563	13	111290880	CARKD
cg03706056	Winning model is Meth ~ G + E + GxE + gender	21	37437565	SETD4	rs1005696	21	37443480	CBR1; LOC100133286; SETD4
cg06694446	Winning model is Meth ~ G + E + GxE + gender	3	191048753	CCDC50;CCDC50;UTS2D	rs9821594	3	191067244	CCDC50
cg23004174	Winning model is Meth ~ G + E + GxE + gender	6	74404879	CD109;CD109;CD109	rs9446997	6	74432663	CD109
cg00729708	Winning model is Meth ~ G + E + GxE + gender	15	101084442	LASS3	rs4580136	15	101075498	CERS3
cg02276807	Winning model is Meth ~ G + E + GxE + gender	12	133022677		rs10505741	12	10079527	CLEC2A
cg24299306	Winning model is Meth ~ G + E + GxE + gender	12	10096152		rs10505741	12	10079527	CLEC2A
cg14583127	Winning model is Meth ~ G + E + GxE + gender	10	37940493		rs7115102	11	123014336	CLMP
cg08432013	Winning model is Meth ~ G + E + GxE + gender	11	83393570	DLG2;DLG2;DLG2;DLG2	rs9645670	11	99224406	CNTN5
cg21251970	Winning model is Meth ~ G + E + GxE + gender	9	140311919	EXD3	rs7855833	9	116987587	COL27A1
cg08686960	Winning model is Meth ~ G + E + GxE + gender	19	36642720	COX7A1	rs753420	19	36643695	COX7A1
cg22857963	Winning model is Meth ~ G + E + GxE + gender	8	144358043	GLI4	rs1676972	8	4577681	CSMD1
cg08106706	Winning model is Meth ~ G + E + GxE + gender	1	50574591	ELAVL4;ELAVL4;ELAVL4;ELAVL4;ELAVL4	rs7547026	1	85030053	CTBS
cg11969330	Winning model is Meth ~ G + E + GxE + gender	4	187125413	CYP4V2	rs7687961	4	187122009	CYP4V2
cg21908664	Winning model is Meth ~ G + E + GxE + gender	1	222987586		rs4609435	1	222991691	DISP1
cg26262573	Winning model is Meth ~ G + E + GxE + gender	7	56516129	LOC650226	rs2580195	13	50780292	DLEU1; BCMS
cg17804850	Winning model is Meth ~ G + E + GxE + gender	18	60052386	TNFRSF11A	rs12726763	1	27958245	FGR
cg20282303	Winning model is Meth ~ G + E + GxE + gender	1	236924392	ACTN2	rs12726763	1	27958245	FGR
cg27073142	Winning model is Meth ~ G + E + GxE + gender	15	45314933	SORD	rs1258806	15	33091281	FMN1
cg02989244	Winning model is Meth ~ G + E + GxE + gender	10	28657270		rs9556352	13	94741199	GPC6
cg15056966	Winning model is Meth ~ G + E + GxE + gender	3	120003702		rs11929146	3	119943453	GPR156
cg10067510	Winning model is Meth ~ G + E + GxE + gender	2	48844971	GTF2A1L;STON1-GTF2A1L;GTF2A1L;GTF2A1L;GTF2A1L	rs13035544	2	48848295	GTF2A1L; STON1-GTF2A1L
cg02814482	Winning model is Meth ~ G + E + GxE + gender	11	93822114	HEPHL1	rs12222234	11	93842104	HEPHL1; AF086184
cg18909235	Winning model is Meth ~ G + E + GxE + gender	17	72948506	C17orf28	rs4789114	17	72950927	HID1
cg02365780	Winning model is Meth ~ G + E + GxE + gender	2	101437872	NPAS2	rs7585103	2	213909647	IKZF2
cg26394916	Winning model is Meth ~ G + E + GxE + gender	3	4909489		rs3805036	3	4882700	ITPR1
cg02011723	Winning model is Meth ~ G + E + GxE + gender	19	12831888	TNPO2;TNPO2;TNPO2	rs999560	19	5091933	KDM4B
cg08045932	Winning model is Meth ~ G + E + GxE + gender	20	61659980		rs1060489	20	61665921	LINC00029; LOC63930
cg18719563	Winning model is Meth ~ G + E + GxE + gender	5	180048155	FLT4;FLT4	rs12595031	15	96024055	LINC00924
cg18147048	Winning model is Meth ~ G + E + GxE + gender	19	2428677	LMNB2;TIMM13	rs1865111	19	2438119	LMNB2
cg18435532	Winning model is Meth ~ G + E + GxE + gender	19	36024802	GAPDHS	rs2239945	19	36033460	LOC100506469; AX747325; GAPDHS
cg21482265	Winning model is Meth ~ G + E + GxE + gender	2	113992762	PAX8;PAX8;PAX8;PAX8;PAX8;LOC440839;LOC654433	rs7589901	2	113993344	LOC654433; PAX8
cg27505492	Winning model is Meth ~ G + E + GxE + gender	12	133187045		rs11146964	12	133181425	LRCOL1
cg12694372	Winning model is Meth ~ G + E + GxE + gender	6	32064582	TNXB	rs4711637	6	40452054	LRFN2
cg10031651	Winning model is Meth ~ G + E + GxE + gender	3	46621686	LRRC2;TDGF1	rs2280414	3	46621215	LRRC2; TDGF1
cg25076597	Winning model is Meth ~ G + E + GxE + gender	10	134150581	LRRC27;LRRC27;LRRC27;LRRC27;LRRC27	rs2295273	10	134150920	LRRC27
cg14789911	Winning model is Meth ~ G + E + GxE + gender	21	47582049	C21orf56;C21orf56	rs2968	21	47608580	LSS
cg19429599	Winning model is Meth ~ G + E + GxE + gender	5	50266099		rs27431	5	16670618	MYO10
cg11424828	Winning model is Meth ~ G + E + GxE + gender	8	2075469	MYOM2	rs2280902	8	2077072	MYOM2
cg21586152	Winning model is Meth ~ G + E + GxE + gender	19	853540	ELANE	rs2117900	19	56419490	NLRP13
cg18857768	Winning model is Meth ~ G + E + GxE + gender	1	228503801	OBSCN;OBSCN	rs4653939	1	228494696	OBSCN
cg06797068	Winning model is Meth ~ G + E + GxE + gender	6	74104600	DDX43;DDX43	rs7747491	6	74085466	OOEP
cg24332783	Winning model is Meth ~ G + E + GxE + gender	11	31818791	PAX6;PAX6;PAX6	rs3026390	11	31813509	PAX6
cg20208600	Winning model is Meth ~ G + E + GxE + gender	11	61159687	TMEM216	rs9872438	3	111543285	PHLDB2; PLCXD2
cg05342682	Winning model is Meth ~ G + E + GxE + gender	7	94953680	PON1	rs757158	7	94955528	PON1
cg23299919	Winning model is Meth ~ G + E + GxE + gender	7	157406096	PTPRN2;PTPRN2;PTPRN2	rs2286233	7	95054257	PON2
cg18313661	Winning model is Meth ~ G + E + GxE + gender	7	63560590		rs2365929	3	61633850	PTPRG
cg12042187	Winning model is Meth ~ G + E + GxE + gender	2	105274747		rs2564118	2	61233289	PUS10
cg14819160	Winning model is Meth ~ G + E + GxE + gender	2	238794922	RAMP1	rs6746771	2	238801786	RAMP1
cg19375418	Winning model is Meth ~ G + E + GxE + gender	18	77292410		rs3785267	16	7574054	RBFOX1
cg13514324	Winning model is Meth ~ G + E + GxE + gender	8	145755804	MGC70857;KIAA1688	rs756627	8	145737286	RECQL4
cg07279321	Winning model is Meth ~ G + E + GxE + gender	6	12717790	PHACTR1	rs1482574	6	72812882	RIMS1
cg03502601	Winning model is Meth ~ G + E + GxE + gender	17	78865373	RPTOR;RPTOR	rs2280146	17	78875669	RPTOR
cg11476241	Winning model is Meth ~ G + E + GxE + gender	17	78866235	RPTOR;RPTOR	rs2280146	17	78875669	RPTOR
cg07138994	Winning model is Meth ~ G + E + GxE + gender	11	8361530		rs947854	11	70565076	SHANK2
cg11002258	Winning model is Meth ~ G + E + GxE + gender	12	130976515	RIMBP2	rs3497	12	46579388	SLC38A1
cg06437740	Winning model is Meth ~ G + E + GxE + gender	13	48575927	SUCLA2	rs17425881	13	48523567	SUCLA2
cg07401067	Winning model is Meth ~ G + E + GxE + gender	5	1725411		rs33409	5	150038265	SYNPO
cg02395171	Winning model is Meth ~ G + E + GxE + gender	17	80858829	TBCD	rs3785520	17	80895745	TBCD
cg11346522	Winning model is Meth ~ G + E + GxE + gender	1	215178601	KCNK2	rs2279503	1	151824089	THEM5
cg02582520	Winning model is Meth ~ G + E + GxE + gender	19	1009172	GRIN3B	rs2498421	9	71855357	TJP2
cg13328209	Winning model is Meth ~ G + E + GxE + gender	12	125223502		rs16919315	12	126084363	TMEM132B
cg13272412	Winning model is Meth ~ G + E + GxE + gender	8	32503511	NRG1;NRG1;NRG1;NRG1;NRG1;NRG1;NRG1;NRG1;NRG1;NRG1;NRG1;NRG1;NRG1;NRG1;NRG1;NRG1	rs1109797	8	140821491	TRAPPC9
cg06385380	Winning model is Meth ~ G + E + GxE + gender	7	48887585		rs10739105	9	6490248	UHRF2
cg24161057	Winning model is Meth ~ G + E + GxE + gender	1	161008811	TSTD1;TSTD1;TSTD1	rs2073653	1	161012760	USF1
cg16835101	Winning model is Meth ~ G + E + GxE + gender	17	406380		rs11650424	17	435896	VPS53
cg03743205	Winning model is Meth ~ G + E + GxE + gender	16	88600835	ZFPM1	rs1993993	16	88596704	ZFPM1
cg02937671	Winning model is Meth ~ G + E + GxE + gender	4	2366485	ZFYVE28	rs3135127	4	2359802	ZFYVE28
cg23489630	Winning model is Meth ~ G + E + GxE + gender	19	44645078	ZNF234;ZNF234	rs6509146	19	44646572	ZNF234
cg00117018	Winning model is Meth ~ G + E + GxE + gender	8	145955983	ZNF251	rs2722468	8	145947776	ZNF251
cg01833234	Winning model is Meth ~ G + E + GxE + gender	11	6592585	DNHD1	rs2081096	19	37964700	ZNF570
cg14933468	Winning model is Meth ~ G + E + GxE + gender	11	62138599	ASRGL1;ASRGL1	rs3865486	19	12084508	ZNF763
cg01335180	Winning model is Meth ~ G + E + GxE + gender	1	161576580	HSPA7	rs12085662	1	238005708
cg16399300	Winning model is Meth ~ G + E + GxE + gender	1	66458687	PDE4B;PDE4B;PDE4B	rs1468772	1	156116488
cg24693760	Winning model is Meth ~ G + E + GxE + gender	1	167509918		rs16859159	1	167507857
cg20784841	Winning model is Meth ~ G + E + GxE + gender	1	196866322	CFHR4	rs495026	1	91936560
cg22035229	Winning model is Meth ~ G + E + GxE + gender	1	76262648	MSH4;MSH4	rs6664254	1	76235084
cg27543040	Winning model is Meth ~ G + E + GxE + gender	1	247802703		rs6679472	1	247861516
cg11801727	Winning model is Meth ~ G + E + GxE + gender	1	228659093		rs7530302	1	220664952
cg17403731	Winning model is Meth ~ G + E + GxE + gender	19	613505	HCN2	exm282078	2	241492350
cg05903289	Winning model is Meth ~ G + E + GxE + gender	2	130345205		rs1012734	2	130376011
cg23649088	Winning model is Meth ~ G + E + GxE + gender	2	200775458	C2orf69	rs10202253	2	200793205
cg18448949	Winning model is Meth ~ G + E + GxE + gender	2	176993089	HOXD8	rs1348807	2	177005757
cg11612786	Winning model is Meth ~ G + E + GxE + gender	2	237078362		rs16852300	2	167414424
cg12268637	Winning model is Meth ~ G + E + GxE + gender	2	176964502	HOXD12	rs4334534	2	30423512
cg10323490	Winning model is Meth ~ G + E + GxE + gender	2	88469007	THNSL2	rs9309316	2	59955616
cg17376609	Winning model is Meth ~ G + E + GxE + gender	13	88328813	SLITRK5	rs13316596	3	190220784
cg03604073	Winning model is Meth ~ G + E + GxE + gender	19	47507409	GRLF1	rs7626026	3	78473138
cg24312680	Winning model is Meth ~ G + E + GxE + gender	4	128704518	HSPA4L	exm424060	4	128723042
cg20311846	Winning model is Meth ~ G + E + GxE + gender	4	77356250	SHROOM3	rs10000169	4	77356246
cg25987564	Winning model is Meth ~ G + E + GxE + gender	4	6010075		rs11098856	4	127043282
cg16530382	Winning model is Meth ~ G + E + GxE + gender	17	37123671	FBXO47	rs12508742	4	134514218
cg13326647	Winning model is Meth ~ G + E + GxE + gender	4	174428191		rs13141534	4	174425236
cg06606949	Winning model is Meth ~ G + E + GxE + gender	5	138211149	CTNNA1;LRRTM2	rs17132862	5	110498972
cg01550017	Winning model is Meth ~ G + E + GxE + gender	5	42924215		rs263349	5	95851624
cg06964475	Winning model is Meth ~ G + E + GxE + gender	5	51688		rs40474	5	146553369
cg18665594	Winning model is Meth ~ G + E + GxE + gender	5	101119420		rs6863058	5	101114271
cg19431274	Winning model is Meth ~ G + E + GxE + gender	5	72714744		rs7718298	5	85267381
cg07787543	Winning model is Meth ~ G + E + GxE + gender	6	901310		rs877151	5	111435797
cg25423002	Winning model is Meth ~ G + E + GxE + gender	6	29924299		exm-rs166327	6	30002881
cg17729655	Winning model is Meth ~ G + E + GxE + gender	6	31038609		exm-rs2517471	6	31052098
cg02389040	Winning model is Meth ~ G + E + GxE + gender	6	31650786		exm-rs805274	6	31665194
cg15837308	Winning model is Meth ~ G + E + GxE + gender	6	32427751		exm-rs9272105	6	32599999
cg13065507	Winning model is Meth ~ G + E + GxE + gender	6	3023676		exm2270279	6	3032804
cg20811607	Winning model is Meth ~ G + E + GxE + gender	6	109760831	PPIL6;PPIL6;SMPD2	exm571045	6	109827716
cg04757901	Winning model is Meth ~ G + E + GxE + gender	6	32060794	TNXB	rs10457421	6	121875648
cg01535312	Winning model is Meth ~ G + E + GxE + gender	6	39903199	MOCS1;MOCS1	rs12210356	6	92922779
cg27530186	Winning model is Meth ~ G + E + GxE + gender	12	121688459	CAMKK2;CAMKK2;CAMKK2;CAMKK2;CAMKK2;CAMKK2;CAMKK2	rs17481190	6	30743014
cg00599530	Winning model is Meth ~ G + E + GxE + gender	6	170589809		rs2180052	6	170589989
cg08084154	Winning model is Meth ~ G + E + GxE + gender	16	2848577	TESSP1	rs562034	6	85845189
cg03972135	Winning model is Meth ~ G + E + GxE + gender	6	170557976		rs6458232	6	41629726
cg04386759	Winning model is Meth ~ G + E + GxE + gender	6	170554795		rs6458232	6	41629726
cg26928531	Winning model is Meth ~ G + E + GxE + gender	6	32407714	HLA-DRA;HLA-DRA	rs9270856	6	32570839
cg03829739	Winning model is Meth ~ G + E + GxE + gender	7	56515510	LOC650226	exm612477	7	30791848
cg10742917	Winning model is Meth ~ G + E + GxE + gender	7	56242801		exm612477	7	30791848
cg19759481	Winning model is Meth ~ G + E + GxE + gender	7	27183401	HOXA5	rs10236343	7	106481440
cg26695758	Winning model is Meth ~ G + E + GxE + gender	6	32063607	TNXB	rs10487624	7	143874190
cg21005510	Winning model is Meth ~ G + E + GxE + gender	7	63353570		rs17840380	7	63410655
cg11002686	Winning model is Meth ~ G + E + GxE + gender	7	55412682		rs4948007	7	55370212
cg17045452	Winning model is Meth ~ G + E + GxE + gender	7	4456131		rs6958692	7	4455097
cg20607577	Winning model is Meth ~ G + E + GxE + gender	8	12958141	DLC1;DLC1;DLC1	exm683592	8	12957475
cg13434842	Winning model is Meth ~ G + E + GxE + gender	8	11567896	GATA4	rs10110186	8	5462574
cg10435486	Winning model is Meth ~ G + E + GxE + gender	8	77591419	LOC100192378	rs10283357	8	131525239
cg05930881	Winning model is Meth ~ G + E + GxE + gender	8	11560540	GATA4	rs7827918	8	60478117
cg16310491	Winning model is Meth ~ G + E + GxE + gender	5	87973597	LOC645323;LOC645323	rs1220651	9	132357836
cg02465282	Winning model is Meth ~ G + E + GxE + gender	10	134377460	INPP5A	exm866646	10	134459388
cg26132114	Winning model is Meth ~ G + E + GxE + gender	10	44223934		rs10751337	10	44223771
cg16652747	Winning model is Meth ~ G + E + GxE + gender	10	134062522	STK32C	rs10886652	10	122030053
cg22787034	Winning model is Meth ~ G + E + GxE + gender	10	133201993		rs1414895	10	89794947
cg23931420	Winning model is Meth ~ G + E + GxE + gender	10	132364083		rs7091248	10	75742670
cg05991820	Winning model is Meth ~ G + E + GxE + gender	10	11785161	ECHDC3	rs718641	10	11779908
cg17970936	Winning model is Meth ~ G + E + GxE + gender	11	130356135		rs12296001	11	130355956
cg16851282	Winning model is Meth ~ G + E + GxE + gender	11	3254011	MRGPRE	rs4545536	11	3259535
cg13900773	Winning model is Meth ~ G + E + GxE + gender	12	130824015	PIWIL1	exm2271737	12	58984659
cg18949192	Winning model is Meth ~ G + E + GxE + gender	12	115134280		rs10744800	12	114129955
cg24461304	Winning model is Meth ~ G + E + GxE + gender	12	115104460		rs10860944	12	103537430
cg14738806	Winning model is Meth ~ G + E + GxE + gender	12	115102713		rs11609105	12	115102482
cg26343563	Winning model is Meth ~ G + E + GxE + gender	12	2031546		rs12229242	12	2034290
cg14573817	Winning model is Meth ~ G + E + GxE + gender	12	107348689	C12orf23	rs1444581	12	107314251
cg08005660	Winning model is Meth ~ G + E + GxE + gender	12	47226005		rs28568812	12	132962509
cg25718766	Winning model is Meth ~ G + E + GxE + gender	12	115104864		rs3803088	12	117150050
cg14108567	Winning model is Meth ~ G + E + GxE + gender	12	8717487		rs7133491	12	8718931
cg10549753	Winning model is Meth ~ G + E + GxE + gender	12	95226786	MIR492	rs7137067	12	95239591
cg00507008	Winning model is Meth ~ G + E + GxE + gender	12	115131421		rs741543	12	108964102
cg16295056	Winning model is Meth ~ G + E + GxE + gender	12	54381798	HOXC10	rs7972658	12	25857523
cg11605835	Winning model is Meth ~ G + E + GxE + gender	5	3597695	IRX1	rs670657	13	33649054
cg16120275	Winning model is Meth ~ G + E + GxE + gender	14	92042040	C14orf184	rs4901693	14	56967728
cg09347959	Winning model is Meth ~ G + E + GxE + gender	15	33360271	FMN1	rs11074209	15	94146473
cg05180717	Winning model is Meth ~ G + E + GxE + gender	15	34516488	TMEM85	rs7169884	15	34512816
cg04120272	Winning model is Meth ~ G + E + GxE + gender	17	37123843	FBXO47	rs1002239	17	15039528
cg15214448	Winning model is Meth ~ G + E + GxE + gender	17	13506230	HS3ST3A1	rs1005639	17	13506205
cg11906444	Winning model is Meth ~ G + E + GxE + gender	19	43858174	CD177	exm1475551_ver3	19	43857873
cg19181528	Winning model is Meth ~ G + E + GxE + gender	20	59542589		rs6027936	20	59541866
cg24940951	Winning model is Meth ~ G + E + GxE + gender	20	61731415	HAR1B;HAR1A	rs6122372	20	61739347
cg04226110	Winning model is Meth ~ G + E + GxE + gender	21	45246164		exm1575514	21	45220483
cg05896524	Winning model is Meth ~ G + E + GxE + gender	21	47604654	C21orf56;C21orf56	exm1580955	21	47614469
cg04412950	Winning model is Meth ~ G + E + GxE + gender	21	33452218	NCRNA00159	rs169476	21	25014133
cg08684580	Winning model is Meth ~ G + E + GxE + gender	7	98029266	BAIAP2L1	rs2107718	7	98005462	BAIAP2L1
cg02896835	Winning model is Meth ~ G + E + GxE + gender	1	92012615		rs6688261	1	91987034	CDC7
cg04481923	Winning model is Meth ~ G + E + GxE + gender	5	135416205	MIR886	rs216123	5	149440746	CSF1R
cg16615357	Winning model is Meth ~ G + E + GxE + gender	5	135416594	MIR886	rs216123	5	149440746	CSF1R
cg26269881	Winning model is Meth ~ G + E + GxE + gender	3	5023310	BHLHE40	rs16982630	2	16821938	FAM49A
cg08033130	Winning model is Meth ~ G + E + GxE + gender	3	45983597	CXCR6;FYCO1	rs1072755	3	45975983	FYCO1
cg10040162	Winning model is Meth ~ G + E + GxE + gender	8	11519182		rs2409809	8	11547150	GATA4
cg06173319	Winning model is Meth ~ G + E + GxE + gender	16	90148775		rs869048	16	90112948	LOC100130015
cg27119456	Winning model is Meth ~ G + E + GxE + gender	10	42863173	LOC441666	rs2466478	10	42858154	LOC441666
cg03782861	Winning model is Meth ~ G + E + GxE + gender	12	97857511	RMST	rs2287081	12	97866233	RMST
cg03022891	Winning model is Meth ~ G + E + GxE + gender	11	1947791	TNNT3;TNNT3;TNNT3;TNNT3	rs3781956	11	1945884	TNNT3
cg06263178	Winning model is Meth ~ G + E + GxE + gender	16	49686567	ZNF423	rs8050856	16	49687948	ZNF423
cg14942863	Winning model is Meth ~ G + E + GxE + gender	19	37894762		rs4803229	19	37864682	ZNF527
cg25595442	Winning model is Meth ~ G + E + GxE + gender	1	39981352	BMP8A	rs17015259	1	209982923
cg23336481	Winning model is Meth ~ G + E + GxE + gender	6	32634344	HLA-DQB1	exm536402	6	32632724
cg23591463	Winning model is Meth ~ G + E + GxE + gender	12	114851495		rs7309941	12	114851286
cg14340928	Winning model is Meth ~ G + E + GxE + gender	5	126408756	FLJ44606;FLJ44606	rs10040840	5	126224390	March3
cg13458781	Winning model is Meth ~ G + E + GxE + gender	1	55089372	ACOT11;FAM151A	rs2060386	1	55089317	ACOT11
cg09867667	Winning model is Meth ~ G + E + GxE + gender	10	22605982	COMMD3	rs1676741	10	127851530	ADAM12
cg19163058	Winning model is Meth ~ G + E + GxE + gender	10	1595785	ADARB2	rs7918979	10	1602635	ADARB2
cg19175386	Winning model is Meth ~ G + E + GxE + gender	12	115134496		rs6975426	7	106156780	AF086203
cg12950816	Winning model is Meth ~ G + E + GxE + gender	7	1198977	ZFAND2A	rs2949192	7	1203841	AK090593
cg00476243	Winning model is Meth ~ G + E + GxE + gender	7	150023		rs3814455	7	149765	AK310146; AK024243
cg05008296	Winning model is Meth ~ G + E + GxE + gender	14	68163792	RDH11	rs1804799	14	68118364	ARG2; VTI1B
cg18875351	Winning model is Meth ~ G + E + GxE + gender	10	49812686	ARHGAP22	rs7914253	10	49807631	ARHGAP22
cg20965743	Winning model is Meth ~ G + E + GxE + gender	14	104552209	ASPG	rs941949	14	104554044	ASPG
cg01673068	Winning model is Meth ~ G + E + GxE + gender	13	113425098	ATP11A;ATP11A	rs2163996	13	113438457	ATP11A
cg05555207	Winning model is Meth ~ G + E + GxE + gender	12	114847641	TBX5;TBX5	rs4770877	13	26335570	ATP8A2
cg08773462	Winning model is Meth ~ G + E + GxE + gender	16	17107610		rs4770877	13	26335570	ATP8A2
cg26196480	Winning model is Meth ~ G + E + GxE + gender	12	114846347	TBX5;TBX5	rs4770877	13	26335570	ATP8A2
cg19127638	Winning model is Meth ~ G + E + GxE + gender	10	70322442	TET1	rs17423838	3	111442959	AX747104; PLCXD2
cg27663389	Winning model is Meth ~ G + E + GxE + gender	19	21666098		rs8112960	19	21775371	BC033373
cg03102494	Winning model is Meth ~ G + E + GxE + gender	1	147801721		rs12561867	1	147801691	BC041003; NBPF8
cg00622128	Winning model is Meth ~ G + E + GxE + gender	16	86714999		rs9937350	16	81307584	BCMO1
cg05133591	Winning model is Meth ~ G + E + GxE + gender	20	61878356	NKAIN4	rs2273487	20	61869826	BIRC7
cg11930926	Winning model is Meth ~ G + E + GxE + gender	4	174429326		rs1444928	4	95876278	BMPR1B
cg01706515	Winning model is Meth ~ G + E + GxE + gender	6	49681774	CRISP2;CRISP2;CRISP2;CRISP2;CRISP2	rs2479723	6	41890835	BYSL
cg01204927	Winning model is Meth ~ G + E + GxE + gender	6	28505394		rs3803533	15	90441937	C15orf38-AP3S2
cg01631319	Winning model is Meth ~ G + E + GxE + gender	1	214158149		rs4643737	3	54243646	CACNA2D3
cg04737131	Winning model is Meth ~ G + E + GxE + gender	7	27142708	HOXA2	rs6461781	7	3051375	CARD11
cg06055873	Winning model is Meth ~ G + E + GxE + gender	7	27142204	HOXA2;HOXA2	rs6461781	7	3051375	CARD11
cg24293689	Winning model is Meth ~ G + E + GxE + gender	1	10732356	CASZ1;CASZ1	rs284262	1	10743363	CASZ1
cg16474696	Winning model is Meth ~ G + E + GxE + gender	19	13875014	MRI1;MRI1	rs371671	19	13870153	CCDC130
cg00551679	Winning model is Meth ~ G + E + GxE + gender	16	86547530	FOXF1	rs4482275	16	83425303	CDH13
cg20016673	Winning model is Meth ~ G + E + GxE + gender	1	108023366	NTNG1;NTNG1;NTNG1	rs12458089	18	59092724	CDH20
cg17916835	Winning model is Meth ~ G + E + GxE + gender	7	96655044	DLX5	rs1946133	7	29527157	CHN2
cg00311883	Winning model is Meth ~ G + E + GxE + gender	1	235099120		rs10925994	1	240015308	CHRM3
cg12748890	Winning model is Meth ~ G + E + GxE + gender	1	27676205	SYTL1	rs10925994	1	240015308	CHRM3
cg26762347	Winning model is Meth ~ G + E + GxE + gender	1	2990031	PRDM16;PRDM16	rs10925994	1	240015308	CHRM3
cg04518186	Winning model is Meth ~ G + E + GxE + gender	11	77299962	AQP11	rs11237249	11	77341135	CLNS1A
cg06698686	Winning model is Meth ~ G + E + GxE + gender	13	49796489	MLNR	rs627527	13	110915135	COL4A1
cg14882966	Winning model is Meth ~ G + E + GxE + gender	2	3699353		rs12468922	2	3660208	COLEC11
cg19016816	Winning model is Meth ~ G + E + GxE + gender	7	1267987		rs1008262	7	28635741	CREB5
cg20073313	Winning model is Meth ~ G + E + GxE + gender	8	52322009	PXDNL	rs2449173	8	3458866	CSMD1
cg05247305	Winning model is Meth ~ G + E + GxE + gender	8	11537762		rs7845677	8	3086808	CSMD1
cg10507304	Winning model is Meth ~ G + E + GxE + gender	6	27637520		rs1535331	6	24342612	DCDC2
cg20559217	Winning model is Meth ~ G + E + GxE + gender	11	126173516	DCPS	rs695029	11	126174164	DCPS
cg12301347	Winning model is Meth ~ G + E + GxE + gender	22	46285638		rs10739418	9	117218901	DFNB31
cg09495303	Winning model is Meth ~ G + E + GxE + gender	17	4804838	CHRNE;C17orf107	rs12600570	17	40261545	DHX58
cg21547364	Winning model is Meth ~ G + E + GxE + gender	9	998533		rs279888	9	978833	DMRT3
cg13298147	Winning model is Meth ~ G + E + GxE + gender	6	10416508	TFAP2A;TFAP2A	rs9502429	6	6284125	F13A1
cg25929664	Winning model is Meth ~ G + E + GxE + gender	7	220654	FAM20C	rs28548330	7	227225	FAM20C
cg01206211	Winning model is Meth ~ G + E + GxE + gender	2	36825736	FEZ2;FEZ2	rs3821150	2	36795233	FEZ2
cg06314111	Winning model is Meth ~ G + E + GxE + gender	12	58119915	AGAP2;LOC100130776;AGAP2	rs6487582	12	27115395	FGFR1OP2
cg04038089	Winning model is Meth ~ G + E + GxE + gender	13	112860420		rs2491235	13	28611710	FLT3
cg08379738	Winning model is Meth ~ G + E + GxE + gender	19	6477033	DENND1C	rs12852	19	35615179	FXYD3
cg13601659	Winning model is Meth ~ G + E + GxE + gender	9	98979119		rs2026001	9	99016095	HSD17B3
cg27585222	Winning model is Meth ~ G + E + GxE + gender	2	114737730		rs4468807	2	234110954	INPP5D
cg14637411	Winning model is Meth ~ G + E + GxE + gender	11	2858355	KCNQ1;KCNQ1	rs2237896	11	2858440	KCNQ1
cg10424417	Winning model is Meth ~ G + E + GxE + gender	5	87989191		rs7711546	5	143669068	KCTD16
cg10482057	Winning model is Meth ~ G + E + GxE + gender	6	24583614	KIAA0319;KIAA0319;KIAA0319;KIAA0319;KIAA0319	rs807532	6	24549668	KIAA0319
cg24246628	Winning model is Meth ~ G + E + GxE + gender	6	168435914	KIF25;KIF25	rs2073632	6	168440640	KIF25
cg25665606	Winning model is Meth ~ G + E + GxE + gender	22	50986051	KLHDC7B	rs5770886	22	50987287	KLHDC7B
cg20002177	Winning model is Meth ~ G + E + GxE + gender	7	96649956	DLX5	rs4239872	22	33898451	LARGE
cg06588556	Winning model is Meth ~ G + E + GxE + gender	11	18477299	LDHAL6A;LDHAL6A	rs4757662	11	18439738	LDHC
cg00753248	Winning model is Meth ~ G + E + GxE + gender	15	96891777		rs2025064	14	39416659	LINC00639
cg13020870	Winning model is Meth ~ G + E + GxE + gender	15	37173017	LOC145845	rs12903788	15	37173267	LOC145845
cg09419670	Winning model is Meth ~ G + E + GxE + gender	9	123605666	PSMD5;LOC253039	rs4837796	9	123610288	LOC253039
cg04145539	Winning model is Meth ~ G + E + GxE + gender	3	46618527	LRRC2;TDGF1	rs2280410	3	46599937	LRRC2; LRRC2-AS1
cg00118342	Winning model is Meth ~ G + E + GxE + gender	2	106777038	UXS1	rs1371562	2	119732948	MARCO
cg06784689	Winning model is Meth ~ G + E + GxE + gender	13	97991111	MBNL2;MBNL2	rs9582124	13	97969765	MBNL2
cg04587220	Winning model is Meth ~ G + E + GxE + gender	19	1071208	HMHA1	rs7251046	19	54686322	MBOAT7
cg03664443	Winning model is Meth ~ G + E + GxE + gender	18	13916330	MC2R	rs4519393	18	13915410	MC2R
cg09004581	Winning model is Meth ~ G + E + GxE + gender	6	74171029	MTO1;MTO1;MTO1	rs535902	6	74191545	MTO1
cg02530860	Winning model is Meth ~ G + E + GxE + gender	8	144371537		rs4840584	8	11636017	NEIL2
cg22056346	Winning model is Meth ~ G + E + GxE + gender	7	35296040		rs12418446	11	21109584	NELL1
cg13185005	Winning model is Meth ~ G + E + GxE + gender	11	268950		rs4923633	11	21539845	NELL1
cg09596958	Winning model is Meth ~ G + E + GxE + gender	12	58132105	AGAP2;AGAP2	rs1452885	12	44944850	NELL2
cg06845268	Winning model is Meth ~ G + E + GxE + gender	2	69615301	GFPT1	rs10175692	2	69642970	NFU1
cg03505654	Winning model is Meth ~ G + E + GxE + gender	1	247579608	NLRP3;NLRP3	rs12137901	1	247581209	NLRP3
cg21958090	Winning model is Meth ~ G + E + GxE + gender	11	112752496		rs1941399	11	114177853	NNMT
cg14373660	Winning model is Meth ~ G + E + GxE + gender	15	96890051		rs12902137	15	24924663	NPAP1
cg07771160	Winning model is Meth ~ G + E + GxE + gender	21	28335945	ADAMTS5	rs10827224	10	33557279	NRP1
cg13583272	Winning model is Meth ~ G + E + GxE + gender	17	739376	NXN	rs8066620	17	738853	NXN
cg13444413	Winning model is Meth ~ G + E + GxE + gender	12	58131011	AGAP2;AGAP2	rs3803057	12	113368734	OAS1
cg11750736	Winning model is Meth ~ G + E + GxE + gender	17	10634140	TMEM220	rs4790348	17	2553836	PAFAH1B1
cg04274199	Winning model is Meth ~ G + E + GxE + gender	21	47334057	PCBP3;PCBP3	rs4819168	21	47337032	PCBP3
cg02560085	Winning model is Meth ~ G + E + GxE + gender	5	140220810	PCDHA6;PCDHA2;PCDHA1;PCDHA8;PCDHA7;PCDHA1;PCDHA6;PCDHA5;PCDHA8;PCDHA3;PCDHA4	rs12153295	5	140347398	PCDHAC1; PCDHA7; PCDHAC2; PCDHA2; PCDHA6; PCDHA8; PCDHA13; PCDHA10; PCDHA12; PCDHA9; PCDHA5; PCDHA11; PCDHA1; PCDHA3; PCDHA4
cg27149937	Winning model is Meth ~ G + E + GxE + gender	4	640594	PDE6B;PDE6B	rs10027866	4	644438	PDE6B
cg07298985	Winning model is Meth ~ G + E + GxE + gender	8	22133076	PIWIL2;PIWIL2	rs4397403	8	22172702	PIWIL2
cg26872792	Winning model is Meth ~ G + E + GxE + gender	12	120763815	PLA2G1B	rs2070873	12	120763440	PLA2G1B
cg25203361	Winning model is Meth ~ G + E + GxE + gender	3	160587737	PPM1L	rs1562464	3	160681614	PPM1L
cg01397325	Winning model is Meth ~ G + E + GxE + gender	11	20386022	HTATIP2;HTATIP2;HTATIP2;HTATIP2;HTATIP2	rs7115830	11	20499412	PRMT3
cg05453358	Winning model is Meth ~ G + E + GxE + gender	8	47529280		rs8019592	14	68863020	RAD51B
cg03560957	Winning model is Meth ~ G + E + GxE + gender	8	55375066		rs12604	8	85833817	RALYL
cg24937727	Winning model is Meth ~ G + E + GxE + gender	19	11517079	RGL3;RGL3	rs317913	19	11510314	RGL3
cg06060754	Winning model is Meth ~ G + E + GxE + gender	5	176797920	RGS14	rs12654812	5	176794191	RGS14
cg16441259	Winning model is Meth ~ G + E + GxE + gender	8	11557906		rs7460251	8	87517988	RMDN1
cg22891070	Winning model is Meth ~ G + E + GxE + gender	19	46801642	HIF3A;HIF3A	rs7252284	19	46804707	RNU6-66P; HIF3A
cg19867917	Winning model is Meth ~ G + E + GxE + gender	2	3642629	COLEC11;COLEC11	rs2071639	2	3628383	RPS7
cg02004499	Winning model is Meth ~ G + E + GxE + gender	7	4244250	SDK1;SDK1	rs17134567	7	4243758	SDK1
cg05752393	Winning model is Meth ~ G + E + GxE + gender	18	43418829	SIGLEC15	rs11082490	18	43412628	SIGLEC15
cg16288318	Winning model is Meth ~ G + E + GxE + gender	13	112986927		rs17766892	5	128311685	SLC27A6
cg09548084	Winning model is Meth ~ G + E + GxE + gender	6	8436218	SLC35B3;SLC35B3;SLC35B3	rs6902448	6	8419561	SLC35B3
cg07167872	Winning model is Meth ~ G + E + GxE + gender	1	205819463	PM20D1	rs708727	1	205767885	SLC41A1
cg26354017	Winning model is Meth ~ G + E + GxE + gender	1	205819088	PM20D1	rs708727	1	205767885	SLC41A1
cg09317502	Winning model is Meth ~ G + E + GxE + gender	7	92857260	HEPACAM2	rs12537520	7	26385615	SNX10
cg04635642	Winning model is Meth ~ G + E + GxE + gender	16	12183938	SNX29	rs350288	16	12225886	SNX29
cg01152056	Winning model is Meth ~ G + E + GxE + gender	6	166260319		rs12462773	19	40985003	SPTBN4
cg16459890	Winning model is Meth ~ G + E + GxE + gender	11	104916331	CASP1;CARD16;CASP1;CASP1;CASP1;CASP1;CARD16	rs10835333	11	3957766	STIM1
cg23549342	Winning model is Meth ~ G + E + GxE + gender	3	4344734	SETMAR;SETMAR	rs308739	3	4376030	SUMF1
cg21617353	Winning model is Meth ~ G + E + GxE + gender	17	43319371	FMNL1	rs2074411	17	35879763	SYNRG
cg17173423	Winning model is Meth ~ G + E + GxE + gender	11	59823993	MS4A3;MS4A3;MS4A3	rs1440284	11	12922799	TEAD1
cg20539175	Winning model is Meth ~ G + E + GxE + gender	13	114188051	TMCO3	rs6577052	13	114182660	TMCO3
cg14126466	Winning model is Meth ~ G + E + GxE + gender	12	114830063	TBX5;TBX5;TBX5;TBX5	rs11060257	12	129822051	TMEM132D
cg21453378	Winning model is Meth ~ G + E + GxE + gender	19	36024253	GAPDHS	rs759996	19	36038221	TMEM147
cg23244022	Winning model is Meth ~ G + E + GxE + gender	8	144437350		rs2450749	8	144434556	TOP1MT
cg06565641	Winning model is Meth ~ G + E + GxE + gender	8	141359674	TRAPPC9;TRAPPC9	rs4736176	8	141358681	TRAPPC9
cg10451078	Winning model is Meth ~ G + E + GxE + gender	8	11560851	GATA4	rs6583604	8	143302580	TSNARE1
cg01329690	Winning model is Meth ~ G + E + GxE + gender	21	38580129	DSCR9	rs13046844	21	38517603	TTC3
cg24977886	Winning model is Meth ~ G + E + GxE + gender	22	42470101	FAM109B	rs5758563	22	42448761	WBP2NL
cg15916160	Winning model is Meth ~ G + E + GxE + gender	16	54972094		rs11649247	16	79155751	WWOX
cg22320962	Winning model is Meth ~ G + E + GxE + gender	8	11560299	GATA4	rs7820759	8	40640413	ZMAT4
cg22711741	Winning model is Meth ~ G + E + GxE + gender	19	57742444	AURKC;AURKC;AURKC;AURKC;AURKC;AURKC	rs4141255	19	57721716	ZNF264
cg17054060	Winning model is Meth ~ G + E + GxE + gender	5	3606081		rs6509698	19	53358889	ZNF468
cg08504662	Winning model is Meth ~ G + E + GxE + gender	19	58868256	ZNF497	rs3830	19	58866434	ZNF497; A1BG-AS1; A1BG
cg22683036	Winning model is Meth ~ G + E + GxE + gender	1	63249209	ATG4C;ATG4C	exm-rs6670655	1	164739171
cg10909939	Winning model is Meth ~ G + E + GxE + gender	1	228075683		exm2260027	1	228057761
cg01200585	Winning model is Meth ~ G + E + GxE + gender	1	228362443	C1orf69	rs12134624	1	228350774
cg26223536	Winning model is Meth ~ G + E + GxE + gender	1	212820166		rs20488	1	228080785
cg03961283	Winning model is Meth ~ G + E + GxE + gender	1	223566761	C1orf65;C1orf65	rs4653743	1	226653478
cg06092502	Winning model is Meth ~ G + E + GxE + gender	1	42611687		rs883062	1	42609867
cg12140851	Winning model is Meth ~ G + E + GxE + gender	7	26897612	SKAP2	exm278782	2	238245008
cg14902204	Winning model is Meth ~ G + E + GxE + gender	2	131046313		rs10178745	2	131063169
cg25793243	Winning model is Meth ~ G + E + GxE + gender	2	11673360	GREB1	rs10197841	2	146518415
cg08611810	Winning model is Meth ~ G + E + GxE + gender	2	54087178	LOC100302652;GPR75	rs10221780	2	146588323
cg11775124	Winning model is Meth ~ G + E + GxE + gender	2	119590123		rs1075304	2	221790557
cg19183395	Winning model is Meth ~ G + E + GxE + gender	2	233216865		rs11680349	2	146889404
cg10543450	Winning model is Meth ~ G + E + GxE + gender	2	119592325		rs13390347	2	36206662
cg15474402	Winning model is Meth ~ G + E + GxE + gender	4	188953969		rs272126	2	131548941
cg05691004	Winning model is Meth ~ G + E + GxE + gender	2	201170426	SPATS2L;SPATS2L;SPATS2L;SPATS2L	rs295140	2	201160699
cg00785112	Winning model is Meth ~ G + E + GxE + gender	22	46450059	C22orf26;LOC150381	rs4972588	2	174444590
cg01268571	Winning model is Meth ~ G + E + GxE + gender	2	170624998		rs6437332	2	240879623
cg02963248	Winning model is Meth ~ G + E + GxE + gender	2	66809780		rs6543987	2	36137996
cg08493051	Winning model is Meth ~ G + E + GxE + gender	2	3487164		rs9752321	2	3494374
cg19383430	Winning model is Meth ~ G + E + GxE + gender	3	187086187	RTP4;RTP4	rs16861986	3	187074496
cg10265740	Winning model is Meth ~ G + E + GxE + gender	3	44622865	ZNF167	rs6441856	3	44596149
cg15706621	Winning model is Meth ~ G + E + GxE + gender	2	54861447	SPTBN1;SPTBN1	rs7643465	3	145460835
cg12219434	Winning model is Meth ~ G + E + GxE + gender	3	80820415		rs7645904	3	8160466
cg01546047	Winning model is Meth ~ G + E + GxE + gender	4	1167409	LOC100130872-SPON2;SPON2;SPON2	rs9819372	3	134471654
cg20891481	Winning model is Meth ~ G + E + GxE + gender	3	71115714	FOXP1	rs9853624	3	45617100
cg19403541	Winning model is Meth ~ G + E + GxE + gender	4	174438312		exm-rs172629	4	55407762
cg21004358	Winning model is Meth ~ G + E + GxE + gender	4	187422119		rs10022244	4	187424564
cg09990852	Winning model is Meth ~ G + E + GxE + gender	4	71587726	RUFY3;RUFY3;RUFY3;RUFY3;RUFY3	rs17050442	4	139403484
cg27126442	Winning model is Meth ~ G + E + GxE + gender	4	106473806	FLJ20184;FLJ20184	rs4613620	4	134714897
cg09768983	Winning model is Meth ~ G + E + GxE + gender	4	183935060		rs7660903	4	183942308
cg15620499	Winning model is Meth ~ G + E + GxE + gender	6	31674753	LY6G6F	rs11133827	5	16048639
cg25984601	Winning model is Meth ~ G + E + GxE + gender	5	168271898	SLIT3	rs17155647	5	102990964
cg25923609	Winning model is Meth ~ G + E + GxE + gender	5	3607092		rs27573	5	55567749
cg03686964	Winning model is Meth ~ G + E + GxE + gender	5	1868279		rs4975744	5	1860049
cg05852276	Winning model is Meth ~ G + E + GxE + gender	5	140579470	PCDHB11	rs6896919	5	3317260
cg01160692	Winning model is Meth ~ G + E + GxE + gender	17	1959620	HIC1;HIC1	rs853799	5	67767428
cg11677683	Winning model is Meth ~ G + E + GxE + gender	5	138211043	CTNNA1;LRRTM2;LRRTM2	rs919260	5	151317924
cg16794061	Winning model is Meth ~ G + E + GxE + gender	6	32407430	HLA-DRA	exm-rs3129858	6	32400520
cg01992382	Winning model is Meth ~ G + E + GxE + gender	6	32064212	TNXB	exm534135	6	32029183
cg00872984	Winning model is Meth ~ G + E + GxE + gender	6	32063991	TNXB	exm534393_ver2	6	32064098
cg14188106	Winning model is Meth ~ G + E + GxE + gender	6	32063895	TNXB	exm534393_ver2	6	32064098
cg05408403	Winning model is Meth ~ G + E + GxE + gender	6	32978271	HLA-DOA	exm588715	6	153296541
cg04116093	Winning model is Meth ~ G + E + GxE + gender	6	170860359	PSMB1	exm596680	6	170862300
cg17261676	Winning model is Meth ~ G + E + GxE + gender	6	26016808		rs169219	6	25957392
cg20873416	Winning model is Meth ~ G + E + GxE + gender	6	30737068		rs17481190	6	30743014
cg22700015	Winning model is Meth ~ G + E + GxE + gender	1	228743131		rs1869677	6	67350269
cg03188580	Winning model is Meth ~ G + E + GxE + gender	6	28829378		rs209177	6	28803103
cg11573566	Winning model is Meth ~ G + E + GxE + gender	6	1386087		rs2499762	6	33948624
cg15166039	Winning model is Meth ~ G + E + GxE + gender	6	160023626		rs4382297	6	160031215
cg09602288	Winning model is Meth ~ G + E + GxE + gender	6	10382800		rs6456402	6	10345571
cg12807764	Winning model is Meth ~ G + E + GxE + gender	5	146864669		rs6911131	6	143865221
cg27341636	Winning model is Meth ~ G + E + GxE + gender	6	27236324		rs6913724	6	27254843
cg09395805	Winning model is Meth ~ G + E + GxE + gender	6	27186076		rs7761889	6	27028454
cg09817162	Winning model is Meth ~ G + E + GxE + gender	6	27185676		rs9356355	6	165686789
cg01657995	Winning model is Meth ~ G + E + GxE + gender	6	31804883	C6orf48;C6orf48;SNORD52	rs9368700	6	31802684
cg19882784	Winning model is Meth ~ G + E + GxE + gender	7	134856562	C7orf49;C7orf49;C7orf49	exm659544	7	134849213
cg06472166	Winning model is Meth ~ G + E + GxE + gender	7	47783603		rs1230531	7	52796887
cg01123783	Winning model is Meth ~ G + E + GxE + gender	7	147591551	MIR548F3;CNTNAP2	rs12672531	7	16776257
cg20040691	Winning model is Meth ~ G + E + GxE + gender	7	95115246	ASB4;ASB4	rs1294910	7	45234851
cg03357999	Winning model is Meth ~ G + E + GxE + gender	7	55516724		rs1364731	7	37556237
cg22962123	Winning model is Meth ~ G + E + GxE + gender	7	27153605	HOXA3;HOXA3;HOXA3;HOXA3	rs1583721	7	63444577
cg16850897	Winning model is Meth ~ G + E + GxE + gender	7	100343110	ZAN;ZAN	rs4729606	7	100321790
cg06980547	Winning model is Meth ~ G + E + GxE + gender	7	22894557		rs717624	7	22894487
cg09845489	Winning model is Meth ~ G + E + GxE + gender	7	157667853	PTPRN2;PTPRN2;PTPRN2	rs7787692	7	91174263
cg02601489	Winning model is Meth ~ G + E + GxE + gender	8	11203954	TDH	rs17153465	8	8396676
cg16530595	Winning model is Meth ~ G + E + GxE + gender	8	144788492		rs1981579	8	5415799
cg07077858	Winning model is Meth ~ G + E + GxE + gender	17	46620300	HOXB2	rs2169166	8	105930209
cg03333634	Winning model is Meth ~ G + E + GxE + gender	8	11555251		rs2466212	8	22844211
cg20749955	Winning model is Meth ~ G + E + GxE + gender	8	9009401	PPP1R3B	rs3101274	8	106052343
cg03054684	Winning model is Meth ~ G + E + GxE + gender	3	39543515	MOBP;MOBP	rs4736865	8	40319197
cg13211302	Winning model is Meth ~ G + E + GxE + gender	8	102236731		rs7018179	8	102208863
cg01444051	Winning model is Meth ~ G + E + GxE + gender	8	144278589		rs7464213	8	144283990
cg21192468	Winning model is Meth ~ G + E + GxE + gender	9	139092501	LHX3;LHX3	exm-rs3780181	9	2640759
cg17246535	Winning model is Meth ~ G + E + GxE + gender	10	2357363		rs12412942	10	2357702
cg05876246	Winning model is Meth ~ G + E + GxE + gender	8	81831079		rs1409298	10	92098023
cg04392266	Winning model is Meth ~ G + E + GxE + gender	10	45720134		rs1655627	10	80410110
cg25383323	Winning model is Meth ~ G + E + GxE + gender	10	125033830		rs3808960	10	124913576
cg19256291	Winning model is Meth ~ G + E + GxE + gender	10	133156155		rs4751365	10	133154905
cg18955367	Winning model is Meth ~ G + E + GxE + gender	19	49002338	LMTK3	rs913290	10	29666463
cg19558933	Winning model is Meth ~ G + E + GxE + gender	11	134632242		rs1289444	11	134648843
cg05237469	Winning model is Meth ~ G + E + GxE + gender	11	133446415		rs2173000	11	133507330
cg04798016	Winning model is Meth ~ G + E + GxE + gender	11	65375067	MAP3K11	rs34147990	11	72160112
cg10719604	Winning model is Meth ~ G + E + GxE + gender	11	117748486	FXYD6;FXYD6;FXYD6;FXYD6;FXYD6	rs631898	11	117748478
cg26064774	Winning model is Meth ~ G + E + GxE + gender	4	6666009		rs6590745	11	134408935
cg15174393	Winning model is Meth ~ G + E + GxE + gender	12	125259081		exm-rs838880	12	125261593
cg01256987	Winning model is Meth ~ G + E + GxE + gender	12	42539512	GXYLT1;GXYLT1	exm2271717	12	42523160
cg11900447	Winning model is Meth ~ G + E + GxE + gender	12	54384763	MIR196A2	rs12304647	12	54384947
cg04100595	Winning model is Meth ~ G + E + GxE + gender	12	27615138		rs17045398	12	78863957
cg03218797	Winning model is Meth ~ G + E + GxE + gender	12	54399468		rs4765787	12	4914001
cg20099830	Winning model is Meth ~ G + E + GxE + gender	12	114842031	TBX5;TBX5;TBX5;TBX5	rs6489900	12	113955587
cg10890302	Winning model is Meth ~ G + E + GxE + gender	6	32064246	TNXB	rs1764766	13	105399540
cg00963378	Winning model is Meth ~ G + E + GxE + gender	13	20716638	GJA3	rs7334170	13	104375959
cg26575450	Winning model is Meth ~ G + E + GxE + gender	2	64834280		rs754730	13	110353513
cg14089267	Winning model is Meth ~ G + E + GxE + gender	13	23412409		rs9552726	13	23399100
cg03240301	Winning model is Meth ~ G + E + GxE + gender	7	23387383	IGF2BP3	rs9592025	13	60780287
cg18620571	Winning model is Meth ~ G + E + GxE + gender	14	103593505	TNFAIP2	rs8007471	14	31294944
cg14841828	Winning model is Meth ~ G + E + GxE + gender	14	99729088	BCL11B;BCL11B	rs9323989	14	98587669
cg08939371	Winning model is Meth ~ G + E + GxE + gender	15	91473059	UNC45A	rs1453948	15	36828984
cg26708220	Winning model is Meth ~ G + E + GxE + gender	15	37387577	MEIS2;MEIS2;MEIS2;MEIS2;MEIS2;MEIS2;MEIS2	rs4489957	15	94201928
cg07527105	Winning model is Meth ~ G + E + GxE + gender	16	88053339	BANP;BANP	exm-rs7499814	16	88052161
cg07522970	Winning model is Meth ~ G + E + GxE + gender	7	134833299	TMEM140	rs16974729	16	25487530
cg19450240	Winning model is Meth ~ G + E + GxE + gender	16	74734251	MLKL;MLKL	rs1991065	16	26287351
cg03382370	Winning model is Meth ~ G + E + GxE + gender	16	1122047	LOC146336	rs213656	16	1113847
cg00452882	Winning model is Meth ~ G + E + GxE + gender	16	67687119	RLTPR	rs2550465	16	74186767
cg07056644	Winning model is Meth ~ G + E + GxE + gender	16	86546785	FOXF1	rs4321183	16	16916297
cg12486486	Winning model is Meth ~ G + E + GxE + gender	4	69179905	YTHDC1;YTHDC1	rs6499718	16	54819870
cg05730038	Winning model is Meth ~ G + E + GxE + gender	17	8702698	MFSD6L	rs11654033	17	8315649
cg18372208	Winning model is Meth ~ G + E + GxE + gender	17	41278263	BRCA1;NBR2;BRCA1;BRCA1;BRCA1;BRCA1	rs12950233	17	14569886
cg24889708	Winning model is Meth ~ G + E + GxE + gender	17	46678719	LOC404266;LOC404266;LOC404266;LOC404266;HOXB6;LOC404266	rs3096644	17	46757575
cg07241573	Winning model is Meth ~ G + E + GxE + gender	18	74960699	GALR1	rs2850889	18	74958607
cg11598403	Winning model is Meth ~ G + E + GxE + gender	18	74799500	MBP;MBP	rs7407326	18	73149980
cg24002183	Winning model is Meth ~ G + E + GxE + gender	19	15568574	RASAL3	exm1498351	19	52496149
cg02447462	Winning model is Meth ~ G + E + GxE + gender	19	861071	CFD	rs1683564	19	859214
cg10667338	Winning model is Meth ~ G + E + GxE + gender	19	49617042	LIN7B	rs4802560	19	49617076
cg07381391	Winning model is Meth ~ G + E + GxE + gender	19	389308		rs4897966	19	389873
cg21204530	Winning model is Meth ~ G + E + GxE + gender	5	172306136	ERGIC1	rs755693	19	16071452
cg25595793	Winning model is Meth ~ G + E + GxE + gender	19	10736117	SLC44A2;SLC44A2	rs11697330	20	48662582
cg08307030	Winning model is Meth ~ G + E + GxE + gender	15	76634380	ISL2	rs6048354	20	22780826
cg10184328	Winning model is Meth ~ G + E + GxE + gender	7	138349158	SVOPL;SVOPL	rs1004402	7	50755208	GRB10
cg21442626	Winning model is Meth ~ G + E + GxE + gender	8	104032819	ATP6V1C1	rs10409512	19	20123246	ZNF682
cg22022881	Winning model is Meth ~ G + E + GxE + gender	2	105853494		exm-rs6712932	2	105837598
cg14925764	Winning model is Meth ~ G + E + GxE + gender	12	132663428		rs11246970	12	132665238
cg22164891	Winning model is Meth ~ G + E + GxE + gender	20	52199729	ZNF217	rs6036230	20	22820537
cg23635910	Winning model is Meth ~ G + E + GxE + gender	1	912055	C1orf170	rs2341354	1	918573
cg05023192	Winning model is Meth ~ G + E + GxE + gender	2	240965916	NDUFA10	rs6709170	2	240967561
cg07234876	Winning model is Meth ~ G + E + GxE + gender	8	600039		rs4735895	8	600729
cg14391148	Winning model is Meth ~ G + E + GxE + gender	9	140175219	C9orf167	rs28455716	9	140148189
cg00321709	Winning model is Meth ~ G + E + GxE + gender	10	135341933	CYP2E1	rs10765069	10	133206629
cg03003335	Winning model is Meth ~ G + E + GxE + gender	1	1229351	ACAP3	rs11260584	1	1239339	ACAP3
cg18402987	Winning model is Meth ~ G + E + GxE + gender	7	1209562		rs2949192	7	1203841	AK090593
cg21775176	Winning model is Meth ~ G + E + GxE + gender	11	7505904	OLFML1	rs10769793	11	7498835	AK128569
cg07930539	Winning model is Meth ~ G + E + GxE + gender	2	177025975		rs4078756	2	177004115	BC047605
cg15990972	Winning model is Meth ~ G + E + GxE + gender	2	177012372		rs4078756	2	177004115	BC047605
cg01320130	Winning model is Meth ~ G + E + GxE + gender	1	67600311		rs4655679	1	67599657	C1orf141
cg04231050	Winning model is Meth ~ G + E + GxE + gender	3	133191297	BFSP2	rs936450	3	53634426	CACNA1D
cg18706028	Winning model is Meth ~ G + E + GxE + gender	11	6292490	CCKBR	rs1042047	11	6293182	CCKBR
cg16073143	Winning model is Meth ~ G + E + GxE + gender	6	159360073		rs9465956	6	21062454	CDKAL1
cg09827496	Winning model is Meth ~ G + E + GxE + gender	16	89740639		rs460879	16	89712889	CHMP1A
cg26749518	Winning model is Meth ~ G + E + GxE + gender	19	51506165	KLK9;KLK8;KLK8;KLK8;KLK8	rs4680058	3	150645351	CLRN1; CLRN1-AS1
cg17822947	Winning model is Meth ~ G + E + GxE + gender	1	207842917	CR1L	rs6696840	1	207819729	CR1L
cg14382976	Winning model is Meth ~ G + E + GxE + gender	7	117067624	ASZ1;ASZ1	rs2729547	7	111817732	DOCK4
cg19684207	Winning model is Meth ~ G + E + GxE + gender	21	40759686	WRB;WRB	rs17755501	21	41460146	DSCAM
cg27119318	Winning model is Meth ~ G + E + GxE + gender	21	40759574	WRB;WRB	rs17755501	21	41460146	DSCAM
cg09601912	Winning model is Meth ~ G + E + GxE + gender	2	119591144		rs10497105	2	153409344	FMNL2
cg16794506	Winning model is Meth ~ G + E + GxE + gender	2	119600002	EN1	rs10497105	2	153409344	FMNL2
cg21796528	Winning model is Meth ~ G + E + GxE + gender	14	89672919	FOXN3;FOXN3	rs11159891	14	89674240	FOXN3
cg20050484	Winning model is Meth ~ G + E + GxE + gender	3	123339334	MYLK;MYLK;MYLK;MYLK;MYLK;MYLK;MYLK;MYLK	rs10511014	3	71211110	FOXP1
cg01403655	Winning model is Meth ~ G + E + GxE + gender	13	43702940		rs424118	13	32606069	FRY
cg17365725	Winning model is Meth ~ G + E + GxE + gender	2	242698748	D2HGDH	rs12472439	2	242717746	GAL3ST2
cg07039423	Winning model is Meth ~ G + E + GxE + gender	7	128531106	KCP;KCP	rs1055240	7	150390504	GIMAP2
cg22052514	Winning model is Meth ~ G + E + GxE + gender	8	142401722		rs13260421	8	142373969	GPR20
cg10589443	Winning model is Meth ~ G + E + GxE + gender	7	30028281	SCRN1;SCRN1;SCRN1;SCRN1	rs17679839	7	126090571	GRM8
cg16789995	Winning model is Meth ~ G + E + GxE + gender	12	13152456	HEBP1;HTR7P	rs17759413	12	13246210	GSG1
cg01493678	Winning model is Meth ~ G + E + GxE + gender	6	32784825	HLA-DOB	rs2071469	6	32784783	HLA-DOB; TAP2
cg13774342	Winning model is Meth ~ G + E + GxE + gender	13	50702795		rs9567737	13	47421266	HTR2A
cg06965072	Winning model is Meth ~ G + E + GxE + gender	10	133956982	JAKMIP3	rs2637624	10	133956675	JAKMIP3
cg05626927	Winning model is Meth ~ G + E + GxE + gender	4	14362239		rs1490452	4	44308547	KCTD8
cg13531120	Winning model is Meth ~ G + E + GxE + gender	13	111522975	C13orf29	rs2277424	13	111522420	LINC00346
cg11883009	Winning model is Meth ~ G + E + GxE + gender	19	13198960	NFIX	rs8096564	18	39910592	LINC00907
cg02245004	Winning model is Meth ~ G + E + GxE + gender	15	76634887		rs11073574	15	98306216	LINC00923
cg06675538	Winning model is Meth ~ G + E + GxE + gender	2	114033490	PAX8;PAX8;PAX8;PAX8;PAX8;LOC440839	rs7589901	2	113993344	LOC654433; PAX8
cg09391136	Winning model is Meth ~ G + E + GxE + gender	5	177398433		rs7718261	5	177373622	LOC728554
cg02032221	Winning model is Meth ~ G + E + GxE + gender	2	238581924	LRRFIP1	rs10929245	2	238591672	LRRFIP1
cg02462253	Winning model is Meth ~ G + E + GxE + gender	4	87028602	MAPK10;MAPK10;MAPK10;MAPK10;MAPK10	rs5006575	4	87037379	MAPK10
cg00468380	Winning model is Meth ~ G + E + GxE + gender	8	11549521		rs6586619	8	17520999	MTUS1
cg05041596	Winning model is Meth ~ G + E + GxE + gender	11	89867385	NAALAD2	rs1892887	11	89867872	NAALAD2
cg26310551	Winning model is Meth ~ G + E + GxE + gender	14	24780540	LTB4R2;LTB4R2;LTB4R2;CIDEB;CIDEB;LTB4R	rs943161	14	34181777	NPAS3
cg15720832	Winning model is Meth ~ G + E + GxE + gender	1	228291682	C1orf35	rs2816913	1	200031107	NR5A2
cg01875467	Winning model is Meth ~ G + E + GxE + gender	5	149493008	CSF1R	rs12655077	5	149495606	PDGFRB
cg05509609	Winning model is Meth ~ G + E + GxE + gender	4	74847829	PF4	rs11574452	4	74846661	PF4
cg18166150	Winning model is Meth ~ G + E + GxE + gender	10	3169037	PFKP	rs7080240	10	3169803	PFKP
cg23445321	Winning model is Meth ~ G + E + GxE + gender	1	234367493	SLC35F3	rs12402641	1	204452779	PIK3C2B
cg25436886	Winning model is Meth ~ G + E + GxE + gender	3	127056972		rs1348109	3	16949514	PLCL2
cg17330251	Winning model is Meth ~ G + E + GxE + gender	7	94953956	PON1	rs757158	7	94955528	PON1
cg15212455	Winning model is Meth ~ G + E + GxE + gender	7	39170539	POU6F2;POU6F2	rs2280667	7	39172228	POU6F2
cg21665744	Winning model is Meth ~ G + E + GxE + gender	7	39171113	POU6F2;POU6F2	rs2280667	7	39172228	POU6F2
cg10628699	Winning model is Meth ~ G + E + GxE + gender	13	103531040	LOC121952	rs10478478	5	119901028	PRR16
cg04249541	Winning model is Meth ~ G + E + GxE + gender	8	18666561	PSD3;PSD3	rs17467958	8	18670645	PSD3
cg18848287	Winning model is Meth ~ G + E + GxE + gender	7	5111641	LOC389458	rs12668616	7	5104359	RBAK; RBAK-RBAKDN
cg04106633	Winning model is Meth ~ G + E + GxE + gender	4	1044584		rs1466216	4	1071907	RNF212
cg03894796	Winning model is Meth ~ G + E + GxE + gender	8	144361315		rs2515062	8	119403784	SAMD12
cg22200727	Winning model is Meth ~ G + E + GxE + gender	4	7246101	SORCS2	rs2008103	4	7250232	SORCS2
cg10865238	Winning model is Meth ~ G + E + GxE + gender	12	67073062	GRIP1	rs3741781	12	109178003	SSH1
cg09017928	Winning model is Meth ~ G + E + GxE + gender	7	158110068	PTPRN2;PTPRN2;PTPRN2	rs10952230	7	149511985	SSPO
cg25335841	Winning model is Meth ~ G + E + GxE + gender	7	38351094		rs12533564	7	38348812	TCRGC2; TRGC2; TARP
cg10876863	Winning model is Meth ~ G + E + GxE + gender	6	155584613	TFB1M;CLDN20	rs3011906	6	155568881	TIAM2
cg04893119	Winning model is Meth ~ G + E + GxE + gender	8	75736301	PI15	rs10081561	8	15497331	TUSC3
cg02532518	Winning model is Meth ~ G + E + GxE + gender	16	3210066		rs909410	16	3165425	ZNF205-AS1; ZNF205
cg02339392	Winning model is Meth ~ G + E + GxE + gender	6	28234615	ZNF187;ZNF187;ZNF187	rs1778484	6	28240798	ZSCAN26
cg07790170	Winning model is Meth ~ G + E + GxE + gender	4	111537570		exm2268830	1	217308047
cg13692836	Winning model is Meth ~ G + E + GxE + gender	1	869368	SAMD11	exm55	1	865694
cg01066472	Winning model is Meth ~ G + E + GxE + gender	1	75591029		rs10798559	1	177631002
cg14824543	Winning model is Meth ~ G + E + GxE + gender	1	1076166		rs10907182	1	1066403
cg00058515	Winning model is Meth ~ G + E + GxE + gender	2	80527798	CTNNA2;CTNNA2	rs10915480	1	4288803
cg02710296	Winning model is Meth ~ G + E + GxE + gender	1	182921851	C1orf14	rs1338445	1	218439928
cg20245116	Winning model is Meth ~ G + E + GxE + gender	1	55522013	PCSK9	rs2495499	1	55494682
cg21262649	Winning model is Meth ~ G + E + GxE + gender	1	223566643	C1orf65	rs4653743	1	226653478
cg04126335	Winning model is Meth ~ G + E + GxE + gender	1	145525223	ITGA10	rs6683842	1	165913774
cg01579216	Winning model is Meth ~ G + E + GxE + gender	1	183560913	NCF2;NCF2	rs7513326	1	159895536
cg26004771	Winning model is Meth ~ G + E + GxE + gender	1	178456093		rs7537225	1	168849973
cg07490070	Winning model is Meth ~ G + E + GxE + gender	2	97505464	ANKRD23	exm213866	2	97527490
cg10418524	Winning model is Meth ~ G + E + GxE + gender	2	176956678	HOXD13	exm2265347	2	119090434
cg01043845	Winning model is Meth ~ G + E + GxE + gender	2	177013071		rs1348807	2	177005757
cg07011913	Winning model is Meth ~ G + E + GxE + gender	2	177014626	HOXD4;MIR10B	rs1348807	2	177005757
cg08079908	Winning model is Meth ~ G + E + GxE + gender	2	176997277		rs1348807	2	177005757
cg12215739	Winning model is Meth ~ G + E + GxE + gender	2	177014966	HOXD4;MIR10B	rs1348807	2	177005757
cg09061684	Winning model is Meth ~ G + E + GxE + gender	2	8724011		rs345893	2	8724337
cg00692780	Winning model is Meth ~ G + E + GxE + gender	2	222434778	EPHA4	rs4676403	2	241583676
cg08687025	Winning model is Meth ~ G + E + GxE + gender	2	127729123		rs574015	2	127738513
cg26154534	Winning model is Meth ~ G + E + GxE + gender	2	241076355	MYEOV2;MYEOV2	rs6721075	2	165841197
cg22910462	Winning model is Meth ~ G + E + GxE + gender	22	17680578	CECR1;CECR1	exm-rs2718812	3	133399702
cg06042826	Winning model is Meth ~ G + E + GxE + gender	3	70048672		exm354900	3	140178485
cg27084712	Winning model is Meth ~ G + E + GxE + gender	3	42977845		rs17633588	3	3585219
cg05413694	Winning model is Meth ~ G + E + GxE + gender	3	11952913		rs9834366	3	11954129
cg24258529	Winning model is Meth ~ G + E + GxE + gender	4	1570685		rs10050053	4	1563920
cg20056949	Winning model is Meth ~ G + E + GxE + gender	4	139609965		rs6448500	4	27166535
cg13023646	Winning model is Meth ~ G + E + GxE + gender	4	165898835	TRIM61	rs6818908	4	179185906
cg07387634	Winning model is Meth ~ G + E + GxE + gender	1	95006322	F3	rs7672176	4	138694514
cg15837280	Winning model is Meth ~ G + E + GxE + gender	5	135415258		rs11133776	5	14036643
cg26526719	Winning model is Meth ~ G + E + GxE + gender	5	1949144		rs11746674	5	1948519
cg25476565	Winning model is Meth ~ G + E + GxE + gender	5	125930017	ALDH7A1	rs2306620	5	125936399
cg19815989	Winning model is Meth ~ G + E + GxE + gender	21	45161359	PDXK	rs425491	5	79395829
cg12584458	Winning model is Meth ~ G + E + GxE + gender	6	28447107		exm-rs2894181	6	31174527
cg19195712	Winning model is Meth ~ G + E + GxE + gender	6	31026215	HCG22	exm-rs3873352_ver2	6	31022113
cg23636571	Winning model is Meth ~ G + E + GxE + gender	6	32828996		exm-rs4713600	6	32822858
cg01497892	Winning model is Meth ~ G + E + GxE + gender	6	170554222		exm2257668	6	170551427
cg08725892	Winning model is Meth ~ G + E + GxE + gender	6	29629986	MOG;MOG;MOG;MOG;MOG;MOG;MOG;MOG;MOG;MOG;MOG	rs1182864	6	39230307
cg19718309	Winning model is Meth ~ G + E + GxE + gender	14	100632904		rs6459621	6	18515976
cg03639929	Winning model is Meth ~ G + E + GxE + gender	6	32765402		rs6899857	6	32770482
cg07257824	Winning model is Meth ~ G + E + GxE + gender	6	170732353		rs7752321	6	170727420
cg19383211	Winning model is Meth ~ G + E + GxE + gender	6	32527588	HLA-DRB6	rs9270856	6	32570839
cg00283857	Winning model is Meth ~ G + E + GxE + gender	6	158018184	ZDHHC14;ZDHHC14	rs9357362	6	41433215
cg26865747	Winning model is Meth ~ G + E + GxE + gender	6	28601377		rs9363764	6	68232042
cg06168204	Winning model is Meth ~ G + E + GxE + gender	6	27570548		rs9366694	6	27623511
cg07659054	Winning model is Meth ~ G + E + GxE + gender	7	27134225	HOXA1;HOXA1	rs1207730	7	96645329
cg05789704	Winning model is Meth ~ G + E + GxE + gender	8	38965018	ADAM32	exm2270847	8	38915604
cg21461082	Winning model is Meth ~ G + E + GxE + gender	21	48081619	PRMT2;PRMT2	exm683707	8	13356621
cg01760090	Winning model is Meth ~ G + E + GxE + gender	8	1365659		rs1019024	8	1363967
cg24160421	Winning model is Meth ~ G + E + GxE + gender	8	48675771		rs12334593	8	26844293
cg27045994	Winning model is Meth ~ G + E + GxE + gender	8	284126		rs12546771	8	297118
cg13411229	Winning model is Meth ~ G + E + GxE + gender	8	143823898	SLURP1	rs2585184	8	143828773
cg11236727	Winning model is Meth ~ G + E + GxE + gender	2	119609592		rs1333914	9	122583234
cg14003931	Winning model is Meth ~ G + E + GxE + gender	10	134938469	GPR123	rs10857665	10	134948776
cg00251270	Winning model is Meth ~ G + E + GxE + gender	10	3536362		rs2388394	10	2769716
cg07355157	Winning model is Meth ~ G + E + GxE + gender	10	23385780	MSRB2	rs2886428	10	23383522
cg06791446	Winning model is Meth ~ G + E + GxE + gender	10	123355268	FGFR2;FGFR2;FGFR2;FGFR2;FGFR2;FGFR2;FGFR2	rs562790	10	18252621
cg03221590	Winning model is Meth ~ G + E + GxE + gender	11	123756314	TMEM225;TMEM225	rs11231727	11	64011854
cg15146462	Winning model is Meth ~ G + E + GxE + gender	11	86142587		rs12576780	11	131169949
cg13740636	Winning model is Meth ~ G + E + GxE + gender	11	93754223	HEPHL1	rs1518574	11	93726072
cg18575740	Winning model is Meth ~ G + E + GxE + gender	4	174457224	NBLA00301	rs7120142	11	103417781
cg06708937	Winning model is Meth ~ G + E + GxE + gender	12	54369336	HOXC11	rs10744311	12	127933756
cg05355757	Winning model is Meth ~ G + E + GxE + gender	12	16762831		rs2445402	12	15174589
cg13233461	Winning model is Meth ~ G + E + GxE + gender	12	54350209	HOXC12	rs4930758	12	5636577
cg01067216	Winning model is Meth ~ G + E + GxE + gender	14	102051021		exm1128771	14	102792631
cg19556901	Winning model is Meth ~ G + E + GxE + gender	15	25414769	SNORD115-1	rs10519711	15	32250155
cg07865923	Winning model is Meth ~ G + E + GxE + gender	16	86535919		exm1261554	16	81175103
cg14947429	Winning model is Meth ~ G + E + GxE + gender	10	28036151	MKX	rs11646074	16	24399918
cg03395511	Winning model is Meth ~ G + E + GxE + gender	6	291903	DUSP22	rs11646696	16	34914397
cg03293206	Winning model is Meth ~ G + E + GxE + gender	16	46603015	ANKRD26P1	rs1641365	16	52240559
cg03890951	Winning model is Meth ~ G + E + GxE + gender	16	86233583		rs276961	16	86236236
cg01451101	Winning model is Meth ~ G + E + GxE + gender	16	73099565		rs4246393	16	47044030
cg04497389	Winning model is Meth ~ G + E + GxE + gender	16	867594		rs681971	16	880773
cg08031982	Winning model is Meth ~ G + E + GxE + gender	16	87577539		rs8047314	16	87577555
cg03819089	Winning model is Meth ~ G + E + GxE + gender	2	66298217		rs10515040	17	51504320
cg24046616	Winning model is Meth ~ G + E + GxE + gender	2	88427630	FABP1	rs10515040	17	51504320
cg01774894	Winning model is Meth ~ G + E + GxE + gender	17	46674395	LOC404266;LOC404266;LOC404266;LOC404266;HOXB6;LOC404266	rs12601765	17	12555817
cg17818792	Winning model is Meth ~ G + E + GxE + gender	17	14115538		rs12944270	17	14116398
cg13304825	Winning model is Meth ~ G + E + GxE + gender	17	79297548	TMEM105	rs2080404	17	68793590
cg18536607	Winning model is Meth ~ G + E + GxE + gender	15	101729526	CHSY1	rs4969099	17	71317467
cg17504394	Winning model is Meth ~ G + E + GxE + gender	17	70339295		rs7210248	17	52964283
cg05527785	Winning model is Meth ~ G + E + GxE + gender	17	46656543	HOXB4	rs7216955	17	54123450
cg24157892	Winning model is Meth ~ G + E + GxE + gender	17	59473707		rs740753	17	59496927
cg19563671	Winning model is Meth ~ G + E + GxE + gender	17	43224158	HEXIM1	rs8064386	17	43236109
cg08288433	Winning model is Meth ~ G + E + GxE + gender	17	20799511	CCDC144NL	rs8067705	17	20819995
cg20090283	Winning model is Meth ~ G + E + GxE + gender	17	36718549	SRCIN1	rs9889514	17	66808359
cg06423211	Winning model is Meth ~ G + E + GxE + gender	19	551401		exm1396127	19	549667
cg24789587	Winning model is Meth ~ G + E + GxE + gender	19	990235	WDR18	exm1398247	19	991129
cg25994622	Winning model is Meth ~ G + E + GxE + gender	19	15582775	PGLYRP2	exm1437882	19	15586672
cg02384543	Winning model is Meth ~ G + E + GxE + gender	19	58879857	ZNF837;ZNF837	rs11672876	19	30232105
cg20548231	Winning model is Meth ~ G + E + GxE + gender	22	31318373	C22orf27	rs576895	22	25931580
cg01124132	Winning model is Meth ~ G + E + GxE + gender	22	32599511	RFPL2;RFPL2;RFPL2	rs5993546	22	19145323
cg18713687	Winning model is Meth ~ G + E + GxE + gender	3	195489789	MUC4;MUC4;MUC4	exm374705	3	195489009
cg20088245	Winning model is Meth ~ G + E + GxE + gender	8	1321375		rs4831476	8	13665492
cg06683487	Winning model is Meth ~ G + E + GxE + gender	16	936480	LMF1	exm2272414_ver2	16	931686
cg11032038	Winning model is Meth ~ G + E + GxE + gender	16	33965322	MIR1826	rs11149693	16	84952753
cg01996567	Winning model is Meth ~ G + E + GxE + gender	7	149484880	SSPO	rs6008503	22	48404527
cg04350215	Winning model is Meth ~ G + E + GxE + gender	1	94559714	ABCA4	rs2068334	1	94559715	ABCA4
cg05630272	Winning model is Meth ~ G + E + GxE + gender	10	1517218	ADARB2	rs2676753	10	1517243	ADARB2
cg27549878	Winning model is Meth ~ G + E + GxE + gender	19	38886554	SPRED3	rs4732897	8	26670795	ADRA1A
cg14322040	Winning model is Meth ~ G + E + GxE + gender	4	71457880	AMBN	rs342461	4	88058472	AFF1
cg04359828	Winning model is Meth ~ G + E + GxE + gender	10	32216031	ARHGAP12	rs2808079	10	32167385	ARHGAP12
cg15690347	Winning model is Meth ~ G + E + GxE + gender	19	50931515	SPIB	rs9678906	2	160200749	BAZ2B
cg16169675	Winning model is Meth ~ G + E + GxE + gender	13	113594722		rs7992904	13	113599499	BC035340
cg13982098	Winning model is Meth ~ G + E + GxE + gender	5	87955859	LOC645323	rs13354466	5	21699135	BC038535
cg21396949	Winning model is Meth ~ G + E + GxE + gender	10	24639738	KIAA1217;KIAA1217;KIAA1217	rs4934262	10	88546128	BMPR1A
cg05017628	Winning model is Meth ~ G + E + GxE + gender	19	48698632		rs10405655	19	48682779	C19orf68
cg06524264	Winning model is Meth ~ G + E + GxE + gender	20	259925	C20orf96	rs6081708	20	256107	C20orf96
cg09417038	Winning model is Meth ~ G + E + GxE + gender	21	47716443	C21orf57	rs11089056	21	47720357	C21orf58
cg00297876	Winning model is Meth ~ G + E + GxE + gender	19	50861774	NAPSA	rs763845	8	69580675	C8orf34
cg26560895	Winning model is Meth ~ G + E + GxE + gender	7	30792301	INMT	rs7811563	7	21949886	CDCA7L
cg18892169	Winning model is Meth ~ G + E + GxE + gender	1	150737762	CTSS	rs1540751	5	19985234	CDH18
cg01010211	Winning model is Meth ~ G + E + GxE + gender	22	17956453	CECR2	rs12484501	22	46914277	CELSR1
cg12551983	Winning model is Meth ~ G + E + GxE + gender	1	3720588		rs4564078	1	3772359	CEP104
cg21046148	Winning model is Meth ~ G + E + GxE + gender	5	72731905		rs254682	5	157213497	CLINT1
cg11982525	Winning model is Meth ~ G + E + GxE + gender	7	106505688	PIK3CG	rs2934491	16	84905542	CRISPLD2
cg26479374	Winning model is Meth ~ G + E + GxE + gender	4	1243980	CTBP1;CTBP1;C4orf42	rs3755931	4	1236840	CTBP1
cg18354248	Winning model is Meth ~ G + E + GxE + gender	10	93390311	PPP1R3C	rs1670154	10	67697762	CTNNA3
cg09163369	Winning model is Meth ~ G + E + GxE + gender	1	210001066	C1orf107	rs126280	1	210019824	DIEXF
cg08570243	Winning model is Meth ~ G + E + GxE + gender	2	110969853	NCRNA00116	rs921281	2	225854120	DOCK10
cg09993718	Winning model is Meth ~ G + E + GxE + gender	11	117670657		rs3819132	11	117671489	DSCAML1
cg17228105	Winning model is Meth ~ G + E + GxE + gender	21	39871301	ERG;ERG;ERG;ERG	rs17285245	21	39871220	ERG
cg20909645	Winning model is Meth ~ G + E + GxE + gender	8	99985049		rs2701910	8	1001246	ERICH1-AS1
cg16101008	Winning model is Meth ~ G + E + GxE + gender	1	10698719	CASZ1	rs536364	1	15613478	FHAD1
cg06358671	Winning model is Meth ~ G + E + GxE + gender	4	5976157	C4orf50	rs16837957	4	5975174	FLJ46481
cg26525772	Winning model is Meth ~ G + E + GxE + gender	1	230272306	GALNT2	rs1973943	1	230272063	GALNT2
cg20591407	Winning model is Meth ~ G + E + GxE + gender	12	1642663		rs10783439	12	51774695	GALNT6
cg07293736	Winning model is Meth ~ G + E + GxE + gender	12	132670858		rs6598205	12	132683862	GALNT9
cg02891314	Winning model is Meth ~ G + E + GxE + gender	5	179741120	GFPT2	rs2303008	5	179743731	GFPT2
cg17098979	Winning model is Meth ~ G + E + GxE + gender	2	241562085		rs2953153	2	241566012	GPR35
cg23537932	Winning model is Meth ~ G + E + GxE + gender	10	121172463	GRK5	rs11198919	10	121185522	GRK5
cg06531430	Winning model is Meth ~ G + E + GxE + gender	16	85207349		rs745604	16	27799677	GSG1L
cg02197634	Winning model is Meth ~ G + E + GxE + gender	6	33048875	HLA-DPB1	rs9277565	6	33056897	HLA-DPB1
cg13878677	Winning model is Meth ~ G + E + GxE + gender	3	13060915	IQSEC1	rs522491	3	13067049	IQSEC1
cg01575590	Winning model is Meth ~ G + E + GxE + gender	20	62084626	KCNQ2;KCNQ2;KCNQ2;KCNQ2;KCNQ2	rs2297386	20	62076263	KCNQ2
cg05861567	Winning model is Meth ~ G + E + GxE + gender	22	50523686	MLC1;MLC1;MLC1	rs2267255	22	34073758	LARGE
cg07828472	Winning model is Meth ~ G + E + GxE + gender	10	131323986	MGMT	rs12256491	10	131319562	MGMT
cg21850879	Winning model is Meth ~ G + E + GxE + gender	17	29621943	NF1;OMG;NF1	rs12940303	17	29604862	NF1
cg13229961	Winning model is Meth ~ G + E + GxE + gender	11	65560701	OVOL1	rs642803	11	65560620	OVOL1
cg14532344	Winning model is Meth ~ G + E + GxE + gender	3	186211530		rs6793271	3	122338637	PARP15
cg20584732	Winning model is Meth ~ G + E + GxE + gender	15	42349694		rs1712428	15	42333313	PLA2G4E
cg27099497	Winning model is Meth ~ G + E + GxE + gender	7	158269297	PTPRN2;PTPRN2;PTPRN2	rs1733148	7	158259728	PTPRN2
cg05267394	Winning model is Meth ~ G + E + GxE + gender	20	32856898	ASIP	rs10920358	1	202152129	PTPRVP
cg08707963	Winning model is Meth ~ G + E + GxE + gender	13	114812780	RASA3	rs4883650	13	114861938	RASA3
cg08482215	Winning model is Meth ~ G + E + GxE + gender	7	5111529	LOC389458	rs12668616	7	5104359	RBAK; RBAK-RBAKDN
cg03868770	Winning model is Meth ~ G + E + GxE + gender	22	30783737	RNF215	rs5997629	22	29112089	RNF215
cg25456020	Winning model is Meth ~ G + E + GxE + gender	17	159130	RPH3AL	rs7224337	17	174121	RPH3AL
cg10547050	Winning model is Meth ~ G + E + GxE + gender	17	27253274	PHF12;PHF12	rs3786330	18	61154993	SERPINB5
cg16988212	Winning model is Meth ~ G + E + GxE + gender	4	7373065	SORCS2	rs2878610	4	7373836	SORCS2
cg10017293	Winning model is Meth ~ G + E + GxE + gender	12	51640305	SMAGP;DAZAP2;SMAGP	rs1909350	12	24180586	SOX5
cg23167246	Winning model is Meth ~ G + E + GxE + gender	13	114150035	TMCO3	rs2260080	13	114156093	TMCO3
cg12044000	Winning model is Meth ~ G + E + GxE + gender	2	1605890		rs2048727	2	1523751	TPO
cg02642126	Winning model is Meth ~ G + E + GxE + gender	8	141046516	TRAPPC9;TRAPPC9	rs7843613	8	141059415	TRAPPC9
cg05624577	Winning model is Meth ~ G + E + GxE + gender	15	81411055		rs10162901	15	54327017	UNC13C
cg23099839	Winning model is Meth ~ G + E + GxE + gender	8	2585976		rs8066911	17	33491566	UNC45B
cg08926642	Winning model is Meth ~ G + E + GxE + gender	1	7887455	PER3	rs707460	1	7838691	VAMP3
cg14299931	Winning model is Meth ~ G + E + GxE + gender	13	111839335	ARHGEF7;ARHGEF7;ARHGEF7;ARHGEF7;ARHGEF7;ARHGEF7	rs3814782	13	42185696	VWA8
cg03738707	Winning model is Meth ~ G + E + GxE + gender	2	128453335		rs6430947	2	128486506	WDR33
cg26777303	Winning model is Meth ~ G + E + GxE + gender	8	97505391	SDC2	rs11642546	16	701656	WDR90
cg18457108	Winning model is Meth ~ G + E + GxE + gender	3	194800853	C3orf21	rs7653402	3	194799732	XXYLT1
cg19698993	Winning model is Meth ~ G + E + GxE + gender	1	244213616	ZNF238	exm2264936	1	190551418
cg21695830	Winning model is Meth ~ G + E + GxE + gender	1	89457462	RBMXL1;RBMXL1;CCBL2;CCBL2	exm73129	1	89478868
cg07417683	Winning model is Meth ~ G + E + GxE + gender	1	159440267		rs11265204	1	159439913
cg22481673	Winning model is Meth ~ G + E + GxE + gender	1	211667751	RD3;RD3	rs11587632	1	211668437
cg24213115	Winning model is Meth ~ G + E + GxE + gender	11	121970740	LOC399959;MIR125B1	rs778124	1	56606206
cg14362178	Winning model is Meth ~ G + E + GxE + gender	2	79007750		rs11687801	2	78978011
cg08720028	Winning model is Meth ~ G + E + GxE + gender	2	716366		rs13001660	2	716367
cg07488576	Winning model is Meth ~ G + E + GxE + gender	2	192711481	SDPR	rs1524145	2	36122388
cg24213669	Winning model is Meth ~ G + E + GxE + gender	2	118616576		rs2570207	2	118606236
cg01854967	Winning model is Meth ~ G + E + GxE + gender	2	863946		rs4263142	2	867187
cg16414030	Winning model is Meth ~ G + E + GxE + gender	3	133502952		exm-rs1830084	3	133508464
cg01152897	Winning model is Meth ~ G + E + GxE + gender	3	194705841		rs6805463	3	194651602
cg02847897	Winning model is Meth ~ G + E + GxE + gender	4	88142275	KLHL8	rs10016992	4	127378114
cg23880736	Winning model is Meth ~ G + E + GxE + gender	4	582172		rs12642634	4	146985627
cg14858014	Winning model is Meth ~ G + E + GxE + gender	4	6728936		rs4420983	4	6733659
cg08893839	Winning model is Meth ~ G + E + GxE + gender	5	154027129		rs11167699	5	154050914
cg17735593	Winning model is Meth ~ G + E + GxE + gender	5	140552505	PCDHB7	rs12658486	5	39806217
cg23506042	Winning model is Meth ~ G + E + GxE + gender	5	50262673		rs3097137	5	73330562
cg09731996	Winning model is Meth ~ G + E + GxE + gender	5	3599090	IRX1	rs4482869	5	24337141
cg21521230	Winning model is Meth ~ G + E + GxE + gender	6	33288635	DAXX;DAXX;DAXX;DAXX	exm-rs2239839	6	33288075
cg04832245	Winning model is Meth ~ G + E + GxE + gender	6	32829144		exm-rs4713600	6	32822858
cg00656735	Winning model is Meth ~ G + E + GxE + gender	6	41470922		exm2270315	6	41467860
cg16345566	Winning model is Meth ~ G + E + GxE + gender	6	32633102	HLA-DQB1	exm536297	6	32629755
cg24180975	Winning model is Meth ~ G + E + GxE + gender	6	53883752	C6orf142;C6orf142	rs1444133	6	92918288
cg25142479	Winning model is Meth ~ G + E + GxE + gender	6	70993440	COL9A1;COL9A1	rs17138546	6	797780
cg26079810	Winning model is Meth ~ G + E + GxE + gender	6	164461131		rs2064792	6	164466497
cg10129154	Winning model is Meth ~ G + E + GxE + gender	16	1093823		rs2535238	6	29645038
cg10174063	Winning model is Meth ~ G + E + GxE + gender	6	29645038	ZFP57	rs2535238	6	29645038
cg01957732	Winning model is Meth ~ G + E + GxE + gender	6	133561716	EYA4;EYA4;EYA4	rs492771	6	133542649
cg22984587	Winning model is Meth ~ G + E + GxE + gender	7	64043119	LOC641746	rs7798993	7	64105259
cg01754525	Winning model is Meth ~ G + E + GxE + gender	8	43131353		rs10112963	8	102162717
cg05056638	Winning model is Meth ~ G + E + GxE + gender	8	24800824		rs11994760	8	24802235
cg09019154	Winning model is Meth ~ G + E + GxE + gender	8	19616280		rs4262337	8	19619751
cg17076635	Winning model is Meth ~ G + E + GxE + gender	8	144484205		rs901764	8	144475424
cg10074506	Winning model is Meth ~ G + E + GxE + gender	10	106035131	GSTO2	exm854649	10	106039185
cg23391090	Winning model is Meth ~ G + E + GxE + gender	10	131631850		rs2065660	10	121764195
cg01477942	Winning model is Meth ~ G + E + GxE + gender	10	2978022		rs2454823	10	2983081
cg26465389	Winning model is Meth ~ G + E + GxE + gender	10	135060475		rs2995337	10	135061804
cg11475788	Winning model is Meth ~ G + E + GxE + gender	11	790761	CEND1;SLC25A22	rs11246321	11	816017
cg16717549	Winning model is Meth ~ G + E + GxE + gender	21	45705699	AIRE	rs34147990	11	72160112
cg15532640	Winning model is Meth ~ G + E + GxE + gender	12	129554566		rs11060115	12	129554644
cg08600378	Winning model is Meth ~ G + E + GxE + gender	13	28562900	PRHOXNB	rs3897927	13	28562901
cg14185541	Winning model is Meth ~ G + E + GxE + gender	13	95366203		rs9524596	13	95368839
cg05376465	Winning model is Meth ~ G + E + GxE + gender	14	76734327		rs4903393	14	76734188
cg02257953	Winning model is Meth ~ G + E + GxE + gender	14	54816093		rs8018917	14	54827982
cg09452082	Winning model is Meth ~ G + E + GxE + gender	15	96886018		rs4775283	15	46619835
cg13456654	Winning model is Meth ~ G + E + GxE + gender	19	524336		rs1566441	16	56597636
cg14550519	Winning model is Meth ~ G + E + GxE + gender	17	58180026	LOC653653	rs11079395	17	58206139
cg25423077	Winning model is Meth ~ G + E + GxE + gender	18	59221601	CDH20	rs517543	18	75367624
cg09491536	Winning model is Meth ~ G + E + GxE + gender	5	3787915		rs621035	18	72863702
cg21849932	Winning model is Meth ~ G + E + GxE + gender	20	62369462	LIME1	exm-rs2315008	20	62343956
cg05132077	Winning model is Meth ~ G + E + GxE + gender	22	49448320		rs926761	22	49486490
cg03113871	Winning model is Meth ~ G + E + GxE + gender	22	31317787	C22orf27	rs5762326	22	28106402
cg03713963	Winning model is Meth ~ G + E + GxE + gender	17	1062968	ABR;ABR	rs7406197	17	1058246	ABR
cg06307176	Winning model is Meth ~ G + E + GxE + gender	5	131281290		rs10054618	5	131195002	ACSL6; LOC728637
cg26353287	Winning model is Meth ~ G + E + GxE + gender	5	42954090		rs4321753	5	33667805	ADAMTS12
cg05904016	Winning model is Meth ~ G + E + GxE + gender	7	968552	ADAP1	rs3757854	7	965643	ADAP1
cg07769957	Winning model is Meth ~ G + E + GxE + gender	19	46443657	NOVA2	rs420703	19	11411868	AF161365; TSPAN16
cg11003133	Winning model is Meth ~ G + E + GxE + gender	1	159046391	AIM2	rs2298803	1	159046430	AIM2
cg13498757	Winning model is Meth ~ G + E + GxE + gender	1	152161927		rs11582620	1	152286126	AK056431; FLG
cg23107878	Winning model is Meth ~ G + E + GxE + gender	1	152161397		rs11582620	1	152286126	AK056431; FLG
cg17248924	Winning model is Meth ~ G + E + GxE + gender	5	110062384	TMEM232	rs337835	5	78180482	ARSB
cg24934011	Winning model is Meth ~ G + E + GxE + gender	1	72382835	NEGR1	rs11055970	12	14580849	ATF7IP
cg23894854	Winning model is Meth ~ G + E + GxE + gender	1	112016615	C1orf162;C1orf162	rs12039707	1	112000344	ATP5F1
cg09626521	Winning model is Meth ~ G + E + GxE + gender	3	113933104		rs7610054	3	113935873	AX747798
cg06779009	Winning model is Meth ~ G + E + GxE + gender	14	102094299		rs2698259	12	114192538	BC007399; AK096932
cg03104083	Winning model is Meth ~ G + E + GxE + gender	12	114887847		rs7957084	12	64717817	BC042855; C12orf56
cg08900101	Winning model is Meth ~ G + E + GxE + gender	12	114833043	TBX5;TBX5;TBX5;TBX5	rs7957084	12	64717817	BC042855; C12orf56
cg18269141	Winning model is Meth ~ G + E + GxE + gender	1	2063966	PRKCZ;PRKCZ;PRKCZ	rs2503701	1	2121118	C1orf86
cg20047561	Winning model is Meth ~ G + E + GxE + gender	10	16561393	C1QL3	rs7913889	10	16559381	C1QL3
cg18771553	Winning model is Meth ~ G + E + GxE + gender	19	6710827	C3	rs2230205	19	6709704	C3
cg01232138	Winning model is Meth ~ G + E + GxE + gender	19	42437425		rs12572404	10	18456526	CACNB2
cg14080048	Winning model is Meth ~ G + E + GxE + gender	7	67319485		rs7794696	7	134504019	CALD1
cg04955405	Winning model is Meth ~ G + E + GxE + gender	10	7409524	SFMBT2	rs2202798	5	19926525	CDH18
cg08747963	Winning model is Meth ~ G + E + GxE + gender	5	150326862	LOC134466	rs10941700	5	20366035	CDH18
cg14602393	Winning model is Meth ~ G + E + GxE + gender	12	133343405		rs1045979	12	133418069	CHFR
cg19683494	Winning model is Meth ~ G + E + GxE + gender	5	74908142		rs10055011	5	74798156	COL4A3BP
cg24327361	Winning model is Meth ~ G + E + GxE + gender	8	4583386	CSMD1	rs12676322	8	4582949	CSMD1
cg19118904	Winning model is Meth ~ G + E + GxE + gender	7	157179789	DNAJB6	rs4960621	7	154616612	DPP6
cg12129080	Winning model is Meth ~ G + E + GxE + gender	10	131684716	EBF3	rs944963	10	131688008	EBF3
cg16316162	Winning model is Meth ~ G + E + GxE + gender	8	144660157	NAPRT1	rs1809148	8	144663075	EEF1D
cg16795804	Winning model is Meth ~ G + E + GxE + gender	2	37384523	EIF2AK2;EIF2AK2	rs12712526	2	37383315	EIF2AK2
cg22115076	Winning model is Meth ~ G + E + GxE + gender	5	50673588		rs10462596	5	15530640	FBXL7
cg08416661	Winning model is Meth ~ G + E + GxE + gender	11	65647279	CTSW	rs568617	11	65653242	FIBP
cg04634427	Winning model is Meth ~ G + E + GxE + gender	15	27087315		rs4906913	15	27052528	GABRB3
cg23285459	Winning model is Meth ~ G + E + GxE + gender	7	2802560	GNA12	rs798486	7	2803037	GNA12
cg02705958	Winning model is Meth ~ G + E + GxE + gender	6	6901065		rs9461006	6	24433483	GPLD1
cg07673020	Winning model is Meth ~ G + E + GxE + gender	7	42896801		rs6948959	7	50697051	GRB10
cg07252200	Winning model is Meth ~ G + E + GxE + gender	10	125751941		rs11818522	10	87606617	GRID1
cg03181300	Winning model is Meth ~ G + E + GxE + gender	6	26195995		rs16891458	6	26234476	HIST1H1D
cg23333490	Winning model is Meth ~ G + E + GxE + gender	6	33050741	HLA-DPB1	rs9277378	6	33050279	HLA-DPB1
cg10596483	Winning model is Meth ~ G + E + GxE + gender	8	143751796	JRK;JRK	rs2976400	8	143743611	JH8; JRK
cg03400374	Winning model is Meth ~ G + E + GxE + gender	1	6086275	KCNAB2;KCNAB2	rs11121065	1	6088364	KCNAB2
cg05802386	Winning model is Meth ~ G + E + GxE + gender	1	43422920	SLC2A1	rs1904200	1	112370606	KCND3
cg08155312	Winning model is Meth ~ G + E + GxE + gender	18	77659949		rs1864528	18	77648218	KCNG2
cg22100274	Winning model is Meth ~ G + E + GxE + gender	7	596062	PRKAR1B;PRKAR1B;PRKAR1B;PRKAR1B;PRKAR1B;PRKAR1B	rs7666642	4	21658285	KCNIP4
cg13046608	Winning model is Meth ~ G + E + GxE + gender	11	57195382	SLC43A3;SLC43A3;SLC43A3	rs11002068	10	78938880	KCNMA1
cg08492173	Winning model is Meth ~ G + E + GxE + gender	5	3597311	IRX1	rs6860529	5	143579812	KCTD16
cg18431856	Winning model is Meth ~ G + E + GxE + gender	4	37245254	KIAA1239	rs17603438	4	37253250	KIAA1239
cg01773685	Winning model is Meth ~ G + E + GxE + gender	19	51330453	KLK15;KLK15;KLK15	rs3745522	19	51330932	KLK15
cg01241390	Winning model is Meth ~ G + E + GxE + gender	5	80596277	RNU5E;RNU5D;ZCCHC9;ZCCHC9;ZCCHC9	rs16878586	5	80596222	LOC100131067; RNU5E-1
cg19495013	Winning model is Meth ~ G + E + GxE + gender	12	52214119	FIGNL2;FIGNL2	rs9943753	12	109840940	MYO1H
cg20638896	Winning model is Meth ~ G + E + GxE + gender	8	2004621	MYOM2	rs1822036	8	2001704	MYOM2
cg14825858	Winning model is Meth ~ G + E + GxE + gender	1	24921758	C1orf130	rs10903095	1	24922129	NCMAP
cg13027142	Winning model is Meth ~ G + E + GxE + gender	2	50201382	NRXN1;NRXN1;NRXN1	rs11889551	2	50202953	NRXN1
cg16702083	Winning model is Meth ~ G + E + GxE + gender	20	62328427	TNFRSF6B;TNFRSF6B	rs734458	11	3148037	OSBPL5
cg19317226	Winning model is Meth ~ G + E + GxE + gender	10	130726701		rs4935109	10	56174108	PCDH15
cg15158783	Winning model is Meth ~ G + E + GxE + gender	4	74847646	PF4	rs11574452	4	74846661	PF4
cg01652244	Winning model is Meth ~ G + E + GxE + gender	6	74063982	DPPA5	rs1150613	6	13180371	PHACTR1
cg25258098	Winning model is Meth ~ G + E + GxE + gender	11	396794	PKP3	rs35828848	11	403545	PKP3
cg24842354	Winning model is Meth ~ G + E + GxE + gender	1	2004057	PRKCZ;PRKCZ	rs6663158	1	2004098	PRKCZ
cg11836372	Winning model is Meth ~ G + E + GxE + gender	10	123353822	FGFR2;FGFR2;FGFR2;FGFR2;FGFR2;FGFR2;FGFR2;FGFR2;FGFR2	rs9418462	10	25155407	PRTFDC1
cg05671758	Winning model is Meth ~ G + E + GxE + gender	16	634009	PIGQ;PIGQ	rs11639717	16	676989	RAB40C
cg27462519	Winning model is Meth ~ G + E + GxE + gender	16	3242639		rs12932094	16	7531324	RBFOX1
cg02407415	Winning model is Meth ~ G + E + GxE + gender	16	857454	PRR25	rs9926655	16	7209601	RBFOX1
cg23824713	Winning model is Meth ~ G + E + GxE + gender	18	61157738	SERPINB5	rs1858143	18	61160035	SERPINB5
cg18011273	Winning model is Meth ~ G + E + GxE + gender	4	7203326	SORCS2	rs2240200	4	7204174	SORCS2
cg13440795	Winning model is Meth ~ G + E + GxE + gender	8	10210267	MSRA;MSRA;MSRA	rs4736691	8	134536088	ST3GAL1
cg13885357	Winning model is Meth ~ G + E + GxE + gender	12	53184041	KRT3	rs13072698	3	136222998	STAG1
cg20066226	Winning model is Meth ~ G + E + GxE + gender	13	100218927		rs9554604	13	100188067	TM9SF2
cg08905654	Winning model is Meth ~ G + E + GxE + gender	12	14996743	ART4	rs12812946	12	128910398	TMEM132C
cg07371504	Winning model is Meth ~ G + E + GxE + gender	17	3433451	TRPV3	rs401643	17	3439454	TRPV3
cg00859178	Winning model is Meth ~ G + E + GxE + gender	1	162467208	UHMK1	rs1062174	1	162493009	UHMK1
cg05981038	Winning model is Meth ~ G + E + GxE + gender	5	40841590	CARD6	rs11919151	3	157139541	VEPH1
cg15298323	Winning model is Meth ~ G + E + GxE + gender	6	160182438	ACAT2	rs4709364	6	160161225	WTAP
cg10368128	Winning model is Meth ~ G + E + GxE + gender	19	57702442	ZNF264	rs8110121	19	57717081	ZNF264
cg17292758	Winning model is Meth ~ G + E + GxE + gender	19	49636594	PPFIA3	rs4806878	19	2846782	ZNF555
cg08679971	Winning model is Meth ~ G + E + GxE + gender	19	38281047		rs35205379	19	38176842	ZNF781
cg02599361	Winning model is Meth ~ G + E + GxE + gender	5	178548373	ADAMTS2	rs7717952	5	178454737	ZNF879
cg27247225	Winning model is Meth ~ G + E + GxE + gender	6	26970382	C6orf41	exm1893109	1	75037091
cg24502334	Winning model is Meth ~ G + E + GxE + gender	1	243264842	LOC731275	rs4658537	1	243277476
cg22172057	Winning model is Meth ~ G + E + GxE + gender	10	1405937	ADARB2	rs7554095	1	87681151
cg00057240	Winning model is Meth ~ G + E + GxE + gender	2	191398360	TMEM194B	exm253142	2	191301368
cg18005337	Winning model is Meth ~ G + E + GxE + gender	2	98340655	ZAP70	rs11123976	2	104678160
cg15506703	Winning model is Meth ~ G + E + GxE + gender	2	242844601		rs12613228	2	58662069
cg09834706	Winning model is Meth ~ G + E + GxE + gender	2	39470743		rs17230094	2	154131206
cg00366850	Winning model is Meth ~ G + E + GxE + gender	2	45232417	SIX2	rs2198200	2	106317561
cg19534681	Winning model is Meth ~ G + E + GxE + gender	2	134785761		rs7594310	2	134775918
cg16083429	Winning model is Meth ~ G + E + GxE + gender	3	49237500	CCDC36;CCDC36	exm314323	3	49200627
cg10440639	Winning model is Meth ~ G + E + GxE + gender	17	154499	RPH3AL	rs6783677	3	180751808
cg14802355	Winning model is Meth ~ G + E + GxE + gender	4	103683140	MANBA	rs12513382	4	43914603
cg22326227	Winning model is Meth ~ G + E + GxE + gender	4	3726292		rs1398548	4	67358218
cg04008252	Winning model is Meth ~ G + E + GxE + gender	4	72897782	NPFFR2	rs16898258	4	19411691
cg01200150	Winning model is Meth ~ G + E + GxE + gender	18	76322683		rs17007771	4	124970239
cg01863042	Winning model is Meth ~ G + E + GxE + gender	13	23309892		rs2673423	4	13002341
cg11553618	Winning model is Meth ~ G + E + GxE + gender	4	185905046		rs6843954	4	185907334
cg12205435	Winning model is Meth ~ G + E + GxE + gender	5	138714322	SLC23A1;SLC23A1	exm2266124	5	138714474
cg18668511	Winning model is Meth ~ G + E + GxE + gender	5	140557227	PCDHB8	exm486523	5	140567264
cg24139639	Winning model is Meth ~ G + E + GxE + gender	5	3605884		rs10054652	5	154774815
cg25631033	Winning model is Meth ~ G + E + GxE + gender	5	2094363		rs10076573	5	2094148
cg26118943	Winning model is Meth ~ G + E + GxE + gender	5	53816563	SNX18;SNX18;SNX18;SNX18	rs1161315	5	99272740
cg17496661	Winning model is Meth ~ G + E + GxE + gender	5	3326343		rs12657678	5	49860118
cg11006960	Winning model is Meth ~ G + E + GxE + gender	5	3180918		rs251833	5	3177876
cg05574272	Winning model is Meth ~ G + E + GxE + gender	5	33938213	RXFP3	rs3797207	5	95169909
cg00649480	Winning model is Meth ~ G + E + GxE + gender	5	3593413		rs442469	5	104079908
cg19526166	Winning model is Meth ~ G + E + GxE + gender	5	110062729	TMEM232	rs814783	5	5120745
cg15671317	Winning model is Meth ~ G + E + GxE + gender	5	1828098		rs831852	5	56415918
cg25153741	Winning model is Meth ~ G + E + GxE + gender	5	177913468	COL23A1	rs9327661	5	133002123
cg02163885	Winning model is Meth ~ G + E + GxE + gender	6	27729346		exm-rs2240061	6	31114848
cg14255617	Winning model is Meth ~ G + E + GxE + gender	6	32729118	HLA-DQB2	exm536297	6	32629755
cg10411221	Winning model is Meth ~ G + E + GxE + gender	6	32904317	HLA-DMB	rs1354452	6	80286973
cg01050010	Winning model is Meth ~ G + E + GxE + gender	17	31149877	MYO1D	rs17755984	6	74064396
cg19636627	Winning model is Meth ~ G + E + GxE + gender	6	29649084		rs2535238	6	29645038
cg10919664	Winning model is Meth ~ G + E + GxE + gender	6	28945322		rs3129111	6	29067772
cg18714224	Winning model is Meth ~ G + E + GxE + gender	6	133564578	EYA4;EYA4;EYA4	rs387816	6	15803232
cg25533993	Winning model is Meth ~ G + E + GxE + gender	19	50550284	ZNF473;ZNF473	rs6913023	6	109037698
cg09512891	Winning model is Meth ~ G + E + GxE + gender	6	103780468		rs7759361	6	103797987
cg02497785	Winning model is Meth ~ G + E + GxE + gender	7	48494608	ABCA13	exm-rs4729759	7	101536886
cg01411921	Winning model is Meth ~ G + E + GxE + gender	7	25893858		rs10231785	7	25898226
cg16180796	Winning model is Meth ~ G + E + GxE + gender	7	23245900		rs10242104	7	23220450
cg17002719	Winning model is Meth ~ G + E + GxE + gender	7	12444013	VWDE	rs17166028	7	12476691
cg14085715	Winning model is Meth ~ G + E + GxE + gender	7	20257162	MACC1	rs2194654	7	53623518
cg13444538	Winning model is Meth ~ G + E + GxE + gender	7	158905317	VIPR2	rs4481540	7	158785846
cg01107185	Winning model is Meth ~ G + E + GxE + gender	7	138795041	ZC3HAV1;ZC3HAV1	rs7811342	7	138794618
cg16569650	Winning model is Meth ~ G + E + GxE + gender	7	2773072	GNA12	rs798539	7	2764665
cg11062466	Winning model is Meth ~ G + E + GxE + gender	8	58055876		exm-rs7017199	8	58065790
cg08599792	Winning model is Meth ~ G + E + GxE + gender	8	103540839		rs2023118	8	123374679
cg20636351	Winning model is Meth ~ G + E + GxE + gender	8	55087400		rs395449	8	55100391
cg25937216	Winning model is Meth ~ G + E + GxE + gender	8	58172855		rs6999005	8	58159585
cg14335159	Winning model is Meth ~ G + E + GxE + gender	9	137426436		rs3118593	9	137426334
cg24284640	Winning model is Meth ~ G + E + GxE + gender	10	8125688		rs11002928	10	81089162
cg15579084	Winning model is Meth ~ G + E + GxE + gender	10	129294626		rs11018152	10	129288822
cg09602803	Winning model is Meth ~ G + E + GxE + gender	10	131843597		rs1536090	10	131841169
cg01177167	Winning model is Meth ~ G + E + GxE + gender	10	101280523		rs2769202	10	32524898
cg24865210	Winning model is Meth ~ G + E + GxE + gender	5	158689727	UBLCP1	rs2907801	10	32409150
cg05852568	Winning model is Meth ~ G + E + GxE + gender	2	95537405	TEKT4	rs845084	10	125220036
cg08144237	Winning model is Meth ~ G + E + GxE + gender	11	100862189	TMEM133	exm890034	11	9769562
cg23916104	Winning model is Meth ~ G + E + GxE + gender	11	7110083	RBMXL2	rs10769764	11	7095322
cg03590420	Winning model is Meth ~ G + E + GxE + gender	11	132662963	OPCML;OPCML	rs11603903	11	4905155
cg11841394	Winning model is Meth ~ G + E + GxE + gender	12	114841536	TBX5;TBX5;TBX5;TBX5	rs10774740	12	114666202
cg21611810	Winning model is Meth ~ G + E + GxE + gender	12	114841870	TBX5;TBX5;TBX5;TBX5	rs10774740	12	114666202
cg22929859	Winning model is Meth ~ G + E + GxE + gender	12	114835179	TBX5;TBX5;TBX5;TBX5	rs10774740	12	114666202
cg19457237	Winning model is Meth ~ G + E + GxE + gender	12	34500585		rs11175890	12	66118509
cg18216249	Winning model is Meth ~ G + E + GxE + gender	12	48100805	RPAP3;RPAP3;RPAP3	rs7298490	12	47970603
cg02002217	Winning model is Meth ~ G + E + GxE + gender	13	24520348		exm-rs2765086	13	24504955
cg23513591	Winning model is Meth ~ G + E + GxE + gender	13	81229232		rs4408423	13	81480220
cg21190982	Winning model is Meth ~ G + E + GxE + gender	14	75180524	FCF1;KIAA0317	rs17278893	14	44566484
cg21484985	Winning model is Meth ~ G + E + GxE + gender	14	70690525		rs6573939	14	69760708
cg15823438	Winning model is Meth ~ G + E + GxE + gender	14	104834351		rs6576032	14	104827897
cg00576936	Winning model is Meth ~ G + E + GxE + gender	15	66332091	MEGF11	rs1349380	15	87708838
cg22444584	Winning model is Meth ~ G + E + GxE + gender	15	37174661	LOC145845	rs1349380	15	87708838
cg10530344	Winning model is Meth ~ G + E + GxE + gender	15	81453270		rs7169204	15	81454021
cg05991492	Winning model is Meth ~ G + E + GxE + gender	16	3988700		rs11649508	16	3987523
cg09744766	Winning model is Meth ~ G + E + GxE + gender	16	53407421		rs2160302	16	53407842
cg08927145	Winning model is Meth ~ G + E + GxE + gender	16	86321899		rs2967321	16	82303566
cg09374031	Winning model is Meth ~ G + E + GxE + gender	16	86548323		rs4843267	16	87800470
cg21690621	Winning model is Meth ~ G + E + GxE + gender	17	48858534		rs17564605	17	48860432
cg26276233	Winning model is Meth ~ G + E + GxE + gender	17	41278135	BRCA1;NBR2;BRCA1;BRCA1;BRCA1;BRCA1	rs3809738	17	10276646
cg06683719	Winning model is Meth ~ G + E + GxE + gender	17	5673550		rs758838	17	5671101
cg00901687	Winning model is Meth ~ G + E + GxE + gender	17	48585270	MYCBPAP	rs8082389	17	48583652
cg20697926	Winning model is Meth ~ G + E + GxE + gender	18	77377589		rs7233068	18	77381710
cg18321051	Winning model is Meth ~ G + E + GxE + gender	19	12251893	ZNF20	exm1430227	19	12256912
cg25757140	Winning model is Meth ~ G + E + GxE + gender	19	38039469		exm1460730	19	38055553
cg00137234	Winning model is Meth ~ G + E + GxE + gender	4	155703138	RBM46	rs11668081	19	22425615
cg26643967	Winning model is Meth ~ G + E + GxE + gender	19	36485282	SDHAF1	rs12460721	19	36477855
cg03161606	Winning model is Meth ~ G + E + GxE + gender	19	29218774		rs4474806	19	29219850
cg13270055	Winning model is Meth ~ G + E + GxE + gender	22	36960499	CACNG2	rs2228703	22	36954628
cg25873514	Winning model is Meth ~ G + E + GxE + gender	17	81014413		rs1143006	17	78599676	B3GNTL1
cg13874425	Winning model is Meth ~ G + E + GxE + gender	9	115835616		rs2009977	9	115867276	FAM225B
cg05915609	Winning model is Meth ~ G + E + GxE + gender	16	2904455	PRSS22	rs3743754	16	77317046	ADAMTS18
cg25272143	Winning model is Meth ~ G + E + GxE + gender	11	62211990	AHNAK	rs10897276	11	62209534	AHNAK
cg17665652	Winning model is Meth ~ G + E + GxE + gender	4	114214093	ANK2;ANK2;ANK2	rs29413	4	114186005	ANK2
cg24231558	Winning model is Meth ~ G + E + GxE + gender	7	16626326		rs1044983	7	16640300	ANKMY2
cg10623530	Winning model is Meth ~ G + E + GxE + gender	7	640409	PRKAR1B;PRKAR1B;PRKAR1B;PRKAR1B;PRKAR1B;PRKAR1B	rs1995991	12	99921291	ANKS1B
cg26416887	Winning model is Meth ~ G + E + GxE + gender	12	111618925	CUX2	rs10745860	12	99957020	ANKS1B
cg21151461	Winning model is Meth ~ G + E + GxE + gender	8	1814745	ARHGEF10	rs17756499	8	1805980	ARHGEF10
cg05758861	Winning model is Meth ~ G + E + GxE + gender	8	143580823	BAI1	rs7462966	8	143569216	BAI1
cg14223966	Winning model is Meth ~ G + E + GxE + gender	9	74061323		rs7850168	9	16766118	BNC2
cg16832592	Winning model is Meth ~ G + E + GxE + gender	18	54814189		rs12608183	18	54815307	BOD1L2
cg13802583	Winning model is Meth ~ G + E + GxE + gender	12	130961453	RIMBP2	rs3885283	12	4433389	C12orf5
cg24088508	Winning model is Meth ~ G + E + GxE + gender	1	38156462	C1orf109	rs3762352	1	38156902	C1orf109
cg26031954	Winning model is Meth ~ G + E + GxE + gender	1	2139327	C1orf86	rs262685	1	2118339	C1orf86
cg06409538	Winning model is Meth ~ G + E + GxE + gender	11	20230145		rs4424910	16	90038786	CENPBD1
cg10071929	Winning model is Meth ~ G + E + GxE + gender	9	130955135	CIZ1;CIZ1;CIZ1;CIZ1;CIZ1	rs10987908	9	130936530	CIZ1
cg01345055	Winning model is Meth ~ G + E + GxE + gender	4	781041	CPLX1	rs11722977	4	790757	CPLX1
cg15379858	Winning model is Meth ~ G + E + GxE + gender	8	19540466	CSGALNACT1;CSGALNACT1	rs4921665	8	19540437	CSGALNACT1
cg27313566	Winning model is Meth ~ G + E + GxE + gender	6	30079155	TRIM31	rs9261442	6	30093744	DQ580846
cg08202144	Winning model is Meth ~ G + E + GxE + gender	8	1004177		rs2701907	8	1003292	ERICH1-AS1
cg05730108	Winning model is Meth ~ G + E + GxE + gender	13	99095003	FARP1	rs9517301	13	99095088	FARP1
cg01982597	Winning model is Meth ~ G + E + GxE + gender	10	50733420	ERCC6;PGBD3	rs943102	10	13729505	FRMD4A
cg15003139	Winning model is Meth ~ G + E + GxE + gender	10	3679950		rs943102	10	13729505	FRMD4A
cg22077361	Winning model is Meth ~ G + E + GxE + gender	1	24195347	FUCA1	rs3003329	1	24193875	FUCA1
cg09847368	Winning model is Meth ~ G + E + GxE + gender	1	230250326	GALNT2	rs754666	1	230250182	GALNT2
cg11196529	Winning model is Meth ~ G + E + GxE + gender	13	107182539	EFNB2	rs804282	8	11611743	GATA4
cg11309454	Winning model is Meth ~ G + E + GxE + gender	1	89459529	CCBL2;CCBL2;RBMXL1;RBMXL1	rs1409150	1	89473175	GBP3
cg02104434	Winning model is Meth ~ G + E + GxE + gender	1	247694406	LOC148824;OR2C3	rs10925076	1	247702886	GCSAML
cg07113653	Winning model is Meth ~ G + E + GxE + gender	6	13428657	GFOD1	rs9296672	6	13425532	GFOD1
cg17094593	Winning model is Meth ~ G + E + GxE + gender	17	693243	RNMTL1	rs2750007	17	677226	GLOD4
cg09650180	Winning model is Meth ~ G + E + GxE + gender	20	62225654	GMEB2	rs3810492	20	62219740	GMEB2
cg17071045	Winning model is Meth ~ G + E + GxE + gender	4	54969609		rs6554148	4	54967214	GSX2; PDGFRA
cg19286774	Winning model is Meth ~ G + E + GxE + gender	2	240181931	HDAC4	rs1403607	2	240176033	HDAC4
cg00631329	Winning model is Meth ~ G + E + GxE + gender	6	26305371		rs2393593	6	26285683	HIST1H4H
cg21752211	Winning model is Meth ~ G + E + GxE + gender	7	27243463		rs2023843	7	27243221	HOTTIP
cg12429610	Winning model is Meth ~ G + E + GxE + gender	2	234113122	INPP5D;INPP5D	rs9247	2	234113301	INPP5D
cg08137948	Winning model is Meth ~ G + E + GxE + gender	1	236686804	LGALS8;LGALS8;LGALS8;LGALS8;LGALS8;LGALS8	rs10127776	1	226474479	LIN9
cg06430465	Winning model is Meth ~ G + E + GxE + gender	16	1014935	LMF1	rs2382948	16	1025983	LMF1
cg14457610	Winning model is Meth ~ G + E + GxE + gender	3	69171735	LMOD3;LMOD3	rs7613159	3	69169882	LMOD3
cg02287371	Winning model is Meth ~ G + E + GxE + gender	5	1246274	SLC6A18	rs2929726	5	17211649	LOC285696
cg07027613	Winning model is Meth ~ G + E + GxE + gender	12	7260608	C1RL;LOC283314	rs10772542	12	12393895	LRP6
cg16337574	Winning model is Meth ~ G + E + GxE + gender	12	56109265	BLOC1S1	rs4325297	11	41235144	LRRC4C
cg06890146	Winning model is Meth ~ G + E + GxE + gender	8	6477732	MCPH1	rs2013938	8	6475904	MCPH1
cg03759537	Winning model is Meth ~ G + E + GxE + gender	8	6484397	MCPH1	rs3020261	8	6484968	MCPH1
cg01431340	Winning model is Meth ~ G + E + GxE + gender	6	110680085	C6orf186	rs7757134	6	110685093	METTL24
cg23021340	Winning model is Meth ~ G + E + GxE + gender	6	110678179	C6orf186	rs9384738	6	110669277	METTL24
cg12437481	Winning model is Meth ~ G + E + GxE + gender	16	420112	MRPL28	rs3830160	16	419092	MRPL28
cg22778903	Winning model is Meth ~ G + E + GxE + gender	21	42741698	MX2	rs45430	21	42746081	MX2
cg03852659	Winning model is Meth ~ G + E + GxE + gender	2	1827732	MYT1L	rs13006826	2	1806879	MYT1L
cg19201144	Winning model is Meth ~ G + E + GxE + gender	2	127951364	CYP27C1	rs701021	12	125033497	NCOR2
cg19626303	Winning model is Meth ~ G + E + GxE + gender	8	6466848	MCPH1	rs4237055	8	63809069	NKAIN3
cg02246922	Winning model is Meth ~ G + E + GxE + gender	6	29342824	OR12D3	rs3749970	6	29342825	OR12D3
cg18540674	Winning model is Meth ~ G + E + GxE + gender	12	54405379	HOXC8	rs436321	5	95754483	PCSK1
cg17202519	Winning model is Meth ~ G + E + GxE + gender	11	84634581	DLG2;DLG2	rs1893185	11	125110671	PKNOX2
cg14750269	Winning model is Meth ~ G + E + GxE + gender	19	46975180	PNMAL1;PNMAL1	rs12978825	19	46974306	PNMAL1
cg27321750	Winning model is Meth ~ G + E + GxE + gender	22	45148218	ARHGAP8;PRR5-ARHGAP8;ARHGAP8	rs9614902	22	45148348	PRR5-ARHGAP8
cg11062158	Winning model is Meth ~ G + E + GxE + gender	7	157890370	PTPRN2;PTPRN2;PTPRN2	rs4909119	7	157976267	PTPRN2
cg23066280	Winning model is Meth ~ G + E + GxE + gender	7	158032496	PTPRN2;PTPRN2;PTPRN2	rs4909119	7	157976267	PTPRN2
cg11157691	Winning model is Meth ~ G + E + GxE + gender	10	124254773	HTRA1	rs7094671	10	95355617	RBP4
cg09807914	Winning model is Meth ~ G + E + GxE + gender	11	55135331	OR4A15	rs754499	15	61136205	RORA
cg15642854	Winning model is Meth ~ G + E + GxE + gender	10	82295864		rs7068369	10	82313437	SH2D4B
cg08390901	Winning model is Meth ~ G + E + GxE + gender	2	109747264	LOC100287216;SH3RF3	rs7567615	2	109759168	SH3RF3
cg26620356	Winning model is Meth ~ G + E + GxE + gender	5	175789238	KIAA1191;KIAA1191;KIAA1191	rs342015	5	175750485	SIMC1
cg12034847	Winning model is Meth ~ G + E + GxE + gender	6	3280558	SLC22A23;SLC22A23	rs6910086	6	3287118	SLC22A23; AX746991; AK096219
cg13461390	Winning model is Meth ~ G + E + GxE + gender	1	217312478	ESRRG	rs10864379	1	9079365	SLC2A7
cg14345572	Winning model is Meth ~ G + E + GxE + gender	17	79259383	SLC38A10;SLC38A10	rs6565549	17	79268234	SLC38A10
cg02104893	Winning model is Meth ~ G + E + GxE + gender	6	123109391	SMPDL3A	rs9375185	6	123118500	SMPDL3A
cg18041277	Winning model is Meth ~ G + E + GxE + gender	8	57030824		rs2514680	8	101222499	SPAG1
cg04875706	Winning model is Meth ~ G + E + GxE + gender	15	97311928		rs1532761	15	97323639	SPATA8-AS1
cg25690958	Winning model is Meth ~ G + E + GxE + gender	17	4439481	SPNS2	rs12451669	17	4440506	SPNS2
cg24820672	Winning model is Meth ~ G + E + GxE + gender	13	112984728		rs1153629	18	55025687	ST8SIA3
cg08476843	Winning model is Meth ~ G + E + GxE + gender	13	33760215	STARD13;STARD13;STARD13;STARD13	rs7319316	13	33748794	STARD13
cg14884160	Winning model is Meth ~ G + E + GxE + gender	7	89840396	STEAP2;STEAP2	rs194503	7	89841084	STEAP2
cg12567635	Winning model is Meth ~ G + E + GxE + gender	6	158439869	SYNJ2	rs881751	6	158439029	SYNJ2
cg07038342	Winning model is Meth ~ G + E + GxE + gender	3	145969625	PLSCR4;PLSCR4;PLSCR4;PLSCR4	rs4688412	3	63491925	SYNPR; SYNPR-AS1
cg16983211	Winning model is Meth ~ G + E + GxE + gender	12	54427636	HOXC4;HOXC5;HOXC5	rs11265297	1	159890459	TAGLN2
cg03794491	Winning model is Meth ~ G + E + GxE + gender	6	32783387	HLA-DOB	rs3763350	6	32787119	TAP2
cg10313385	Winning model is Meth ~ G + E + GxE + gender	9	14349308		rs2824808	21	19775220	TMPRSS15
cg18805774	Winning model is Meth ~ G + E + GxE + gender	8	144207261		rs2726557	8	59792800	TOX
cg21827809	Winning model is Meth ~ G + E + GxE + gender	1	3575147	TP73	rs2224718	1	3576060	TP73
cg02497558	Winning model is Meth ~ G + E + GxE + gender	17	46608570	HOXB1	rs161394	17	3489244	TRPV1
cg14762845	Winning model is Meth ~ G + E + GxE + gender	17	3500390	TRPV1;TRPV1;TRPV1	rs2277675	17	3500510	TRPV1
cg13785068	Winning model is Meth ~ G + E + GxE + gender	17	3416273		rs10852860	17	3416172	TRPV3; SPATA22
cg04756515	Winning model is Meth ~ G + E + GxE + gender	18	72837700		rs2268466	14	81484599	TSHR
cg14093610	Winning model is Meth ~ G + E + GxE + gender	2	223162666	PAX3;PAX3;PAX3;PAX3;PAX3;PAX3;PAX3;PAX3;CCDC140	rs7124727	11	9896939	U80769; SBF2
cg19766460	Winning model is Meth ~ G + E + GxE + gender	21	43528205	UMODL1;UMODL1;C21orf128	rs1571737	21	43530671	UMODL1
cg03656099	Winning model is Meth ~ G + E + GxE + gender	17	59481954	TBX2	rs1915952	3	156987482	VEPH1
cg08116775	Winning model is Meth ~ G + E + GxE + gender	8	135726595	ZFAT	rs10505627	8	135693723	ZFAT
cg18592195	Winning model is Meth ~ G + E + GxE + gender	1	227963171	SNAP47	exm154612	1	227935762
cg09506600	Winning model is Meth ~ G + E + GxE + gender	1	248100228	OR2L13	exm167259	1	248129240
cg20200200	Winning model is Meth ~ G + E + GxE + gender	1	18807388	KLHDC7A	exm24367	1	18808292
cg10167378	Winning model is Meth ~ G + E + GxE + gender	1	228756711		rs11588356	1	228715780
cg22875332	Winning model is Meth ~ G + E + GxE + gender	1	76189707	ACADM;ACADM	rs1251079	1	76189445
cg22698272	Winning model is Meth ~ G + E + GxE + gender	1	221054615	HLX	rs16856966	1	166326750
cg16906964	Winning model is Meth ~ G + E + GxE + gender	1	4660171		rs3896439	1	4668670
cg15809959	Winning model is Meth ~ G + E + GxE + gender	17	36720382	SRCIN1	rs4534351	1	88117423
cg16985288	Winning model is Meth ~ G + E + GxE + gender	1	227015456		rs9660802	1	227017031
cg25150021	Winning model is Meth ~ G + E + GxE + gender	2	242806033		exm2265325_ver2	2	70176616
cg13851508	Winning model is Meth ~ G + E + GxE + gender	2	66805939		rs12471464	2	67204642
cg00051154	Winning model is Meth ~ G + E + GxE + gender	2	237079099		rs1921660	2	237083077
cg05960677	Winning model is Meth ~ G + E + GxE + gender	2	152117363	RBM43	rs2278089	2	152146672
cg15324917	Winning model is Meth ~ G + E + GxE + gender	1	230992843	C1orf198;C1orf198;C1orf198	rs2881165	2	18336818
cg21647182	Winning model is Meth ~ G + E + GxE + gender	2	1657483	PXDN	rs2881165	2	18336818
cg01357846	Winning model is Meth ~ G + E + GxE + gender	2	79252794	REG3G;REG3G	rs368506	2	79252761
cg09610578	Winning model is Meth ~ G + E + GxE + gender	3	129407542	TMCC1;TMCC1;TMCC1	rs1507870	3	36830901
cg07078958	Winning model is Meth ~ G + E + GxE + gender	3	15311183	SH3BP5;SH3BP5	rs637382	3	22929986
cg07286216	Winning model is Meth ~ G + E + GxE + gender	7	56515846	LOC650226	rs9848440	3	153041225
cg14872260	Winning model is Meth ~ G + E + GxE + gender	4	55095209	PDGFRA	rs13124867	4	161337411
cg10360906	Winning model is Meth ~ G + E + GxE + gender	4	56023751		rs2219469	4	56014425
cg18351406	Winning model is Meth ~ G + E + GxE + gender	4	77819688	ANKRD56	rs2703115	4	77824442
cg07210669	Winning model is Meth ~ G + E + GxE + gender	4	6695475	S100P	rs4645287	4	6694778
cg09125779	Winning model is Meth ~ G + E + GxE + gender	4	57547999	HOPX;HOPX;HOPX	rs4865142	4	57549583
cg18413237	Winning model is Meth ~ G + E + GxE + gender	7	41742795	LOC285954;INHBA;LOC285954	rs599290	4	43410470
cg00317585	Winning model is Meth ~ G + E + GxE + gender	4	188156703		rs7695955	4	188157742
cg08818829	Winning model is Meth ~ G + E + GxE + gender	5	13810279	DNAH5	exm445106	5	13811775
cg07733851	Winning model is Meth ~ G + E + GxE + gender	5	142781498	NR3C1;NR3C1;NR3C1;NR3C1;NR3C1;NR3C1;NR3C1	rs1217805	5	71378739
cg08785317	Winning model is Meth ~ G + E + GxE + gender	16	86604854		rs12659559	5	71137775
cg02563364	Winning model is Meth ~ G + E + GxE + gender	2	102272387		rs17143349	5	117283938
cg01667892	Winning model is Meth ~ G + E + GxE + gender	5	23507656	PRDM9	rs1994929	5	23507631
cg20790798	Winning model is Meth ~ G + E + GxE + gender	5	1857306		rs260393	5	1856596
cg17875584	Winning model is Meth ~ G + E + GxE + gender	12	50790638	FAM186A	rs853799	5	67767428
cg20907136	Winning model is Meth ~ G + E + GxE + gender	6	33041221	HLA-DPA1	exm-rs1126769	6	33036435
cg07362537	Winning model is Meth ~ G + E + GxE + gender	6	33240820	VPS52;RPS18	exm-rs9277965	6	33256397
cg05651511	Winning model is Meth ~ G + E + GxE + gender	17	78754090	RPTOR;RPTOR	rs10046143	6	8998070
cg24886867	Winning model is Meth ~ G + E + GxE + gender	6	3076190	RIPK1	rs10945154	6	70137886
cg07188523	Winning model is Meth ~ G + E + GxE + gender	6	44528793		rs2146349	6	44525989
cg22494932	Winning model is Meth ~ G + E + GxE + gender	6	29648379		rs2535238	6	29645038
cg26234900	Winning model is Meth ~ G + E + GxE + gender	6	32820214	TAP1	rs2745626	6	1466548
cg03998835	Winning model is Meth ~ G + E + GxE + gender	6	85478207		rs3823037	6	159817482
cg19618622	Winning model is Meth ~ G + E + GxE + gender	6	166901831	RPS6KA2;RPS6KA2	rs4895890	6	130941233
cg06525347	Winning model is Meth ~ G + E + GxE + gender	6	133561630	EYA4;EYA4;EYA4	rs509685	6	133517005
cg19324940	Winning model is Meth ~ G + E + GxE + gender	6	134213992	TCF21	rs6906645	6	57130574
cg18720698	Winning model is Meth ~ G + E + GxE + gender	6	1608500		rs6911879	6	40580956
cg17697016	Winning model is Meth ~ G + E + GxE + gender	6	1606348		rs7761031	6	160695742
cg03340964	Winning model is Meth ~ G + E + GxE + gender	20	17552529	DSTN;DSTN	rs7775840	6	146900616
cg25319067	Winning model is Meth ~ G + E + GxE + gender	6	10383084		rs809951	6	10375395
cg03605610	Winning model is Meth ~ G + E + GxE + gender	6	41394765		rs814839	6	41394212
cg09947611	Winning model is Meth ~ G + E + GxE + gender	11	1542360	HCCA2	rs12666618	7	21449418
cg13558774	Winning model is Meth ~ G + E + GxE + gender	4	1196025	LOC100130872;LOC100130872-SPON2	rs12672035	7	21443004
cg03964111	Winning model is Meth ~ G + E + GxE + gender	7	150498493	TMEM176B;TMEM176B;TMEM176B;TMEM176B;TMEM176A	rs2888674	7	150510915
cg04255391	Winning model is Meth ~ G + E + GxE + gender	8	145008397	PLEC1;PLEC1;PLEC1;PLEC1;PLEC1;PLEC1;PLEC1;PLEC1	exm2258729_ver4	8	145011204
cg23400446	Winning model is Meth ~ G + E + GxE + gender	10	135342560	CYP2E1	rs10283242	8	72619613
cg20100745	Winning model is Meth ~ G + E + GxE + gender	8	134307728	NDRG1;NDRG1	rs2052716	8	95641609
cg21944491	Winning model is Meth ~ G + E + GxE + gender	19	41119829	LTBP4;LTBP4;LTBP4	rs2979831	8	24993705
cg09361966	Winning model is Meth ~ G + E + GxE + gender	1	242220475		rs3934874	8	55914456
cg22309696	Winning model is Meth ~ G + E + GxE + gender	2	172960993		rs6998217	8	5466977
cg14391907	Winning model is Meth ~ G + E + GxE + gender	9	117349544	ATP6V1G1	rs10982317	9	117349653
cg15678844	Winning model is Meth ~ G + E + GxE + gender	10	26500780	MYO3A	exm2267086	10	26505496
cg01008433	Winning model is Meth ~ G + E + GxE + gender	10	3278410		rs10795014	10	3274756
cg10314760	Winning model is Meth ~ G + E + GxE + gender	10	123353654	FGFR2;FGFR2;FGFR2;FGFR2;FGFR2;FGFR2;FGFR2;FGFR2;FGFR2;FGFR2	rs12264744	10	60052999
cg04819048	Winning model is Meth ~ G + E + GxE + gender	10	14014548	FRMD4A	rs1936614	10	92434957
cg10148419	Winning model is Meth ~ G + E + GxE + gender	10	134801678		rs7081698	10	134803058
cg26248066	Winning model is Meth ~ G + E + GxE + gender	11	70303464		rs11236302	11	70295897
cg03475182	Winning model is Meth ~ G + E + GxE + gender	11	110581454	ARHGAP20	rs11501062	11	110638732
cg09566995	Winning model is Meth ~ G + E + GxE + gender	11	1320634	TOLLIP	rs7109038	11	107128014
cg09094964	Winning model is Meth ~ G + E + GxE + gender	12	2046045		rs10735402	12	105708888
cg24838063	Winning model is Meth ~ G + E + GxE + gender	12	130822603	PIWIL1	rs1466771	12	130818021
cg13944111	Winning model is Meth ~ G + E + GxE + gender	12	107296891		rs2024518	12	107296902
cg00267207	Winning model is Meth ~ G + E + GxE + gender	12	14849579	GUCY2C	rs247342	12	14854832
cg04741728	Winning model is Meth ~ G + E + GxE + gender	12	133003907		rs28445086	12	132979999
cg08718098	Winning model is Meth ~ G + E + GxE + gender	12	116756405		rs3851644	12	116718953
cg15450139	Winning model is Meth ~ G + E + GxE + gender	12	15114710	ARHGDIB	rs3983688	12	15148244
cg18693141	Winning model is Meth ~ G + E + GxE + gender	12	125242977		rs701100	12	125242507
cg00761125	Winning model is Meth ~ G + E + GxE + gender	12	96590115	ELK3	rs773484	12	77319533
cg11157076	Winning model is Meth ~ G + E + GxE + gender	1	12703864	AADACL4	rs12586079	13	55020068
cg06470855	Winning model is Meth ~ G + E + GxE + gender	13	112997365		rs1335686	13	63487629
cg22627570	Winning model is Meth ~ G + E + GxE + gender	13	23501397		rs7333868	13	23504097
cg05487001	Winning model is Meth ~ G + E + GxE + gender	13	111838430	ARHGEF7;ARHGEF7;ARHGEF7;ARHGEF7;ARHGEF7	rs9538386	13	59896050
cg21535947	Winning model is Meth ~ G + E + GxE + gender	13	25875133	NUPL1;NUPL1	rs9538394	13	59928421
cg12058490	Winning model is Meth ~ G + E + GxE + gender	12	9268379	A2M	rs9555139	13	105783878
cg03350828	Winning model is Meth ~ G + E + GxE + gender	2	66804865		rs4981658	14	28164745
cg13292042	Winning model is Meth ~ G + E + GxE + gender	4	111535334		rs10520805	15	96573142
cg00836101	Winning model is Meth ~ G + E + GxE + gender	15	39876248	THBS1	rs16953991	15	70238368
cg24782378	Winning model is Meth ~ G + E + GxE + gender	15	100672379	ADAMTS17	rs4775222	15	60186124
cg27514038	Winning model is Meth ~ G + E + GxE + gender	15	23035493	NIPA2;NIPA2;NIPA2;NIPA2	rs4778334	15	23040856
cg18781032	Winning model is Meth ~ G + E + GxE + gender	12	7941120	NANOG	exm1242218	16	56545175
cg08624915	Winning model is Meth ~ G + E + GxE + gender	16	31538718	AHSP	rs13338939	16	31537804
cg10112943	Winning model is Meth ~ G + E + GxE + gender	4	148401351	EDNRA;EDNRA;EDNRA	rs8054701	16	25469105
cg03625141	Winning model is Meth ~ G + E + GxE + gender	16	2892769	TMPRSS8	rs8060332	16	2892770
cg24775616	Winning model is Meth ~ G + E + GxE + gender	17	1157257		rs2885350	17	1159586
cg17753212	Winning model is Meth ~ G + E + GxE + gender	17	6659562	XAF1;XAF1	rs8076345	17	68212550
cg26744682	Winning model is Meth ~ G + E + GxE + gender	19	50249584	TSKS	exm1492094	19	50248501
cg08906015	Winning model is Meth ~ G + E + GxE + gender	19	47157825	DACT3	rs10413445	19	32722146
cg07091678	Winning model is Meth ~ G + E + GxE + gender	10	99734120	CRTAC1	rs440597	19	22096519
cg01403055	Winning model is Meth ~ G + E + GxE + gender	19	401992		rs4897966	19	389873
cg05171952	Winning model is Meth ~ G + E + GxE + gender	5	134365520	PITX1	rs7508451	19	40339678
cg10171357	Winning model is Meth ~ G + E + GxE + gender	15	96910540		rs8110054	19	8240413
cg06375949	Winning model is Meth ~ G + E + GxE + gender	4	4863356	MSX1	rs1354481	21	24836014
cg22070880	Winning model is Meth ~ G + E + GxE + gender	22	50098194		rs11090995	22	50085210

## Sheet: table7_GO_molecularfunction
Genes_mapping _to_best_explained_by_Genotype_CpG-SNP_Pairs_GOMF
Enrichment analysis report
Enrichment by GO Molecular Functions					M1CpG_gene_genelist				M1SNP_gene_genelist				M4CpG_gene_genelist				M4SNP_gene_genelist				M1all_gene_genelist				M4all_gene(1)_genelist
#	Molecular functions	Total	min(pValue)	Min FDR	p-value	FDR	In Data	Network Objects from Active Data	p-value	FDR	In Data	Network Objects from Active Data	p-value	FDR	In Data	Network Objects from Active Data	p-value	FDR	In Data	Network Objects from Active Data	p-value	FDR	In Data	Network Objects from Active Data	p-value	FDR	In Data	Network Objects from Active Data
1	protein binding	9298	6.21971e-05	0.00839661	0.00034116	0.0472204	150	JKAP, HLA-A2, NOX5, Ski, NOX4, Paralemmin, ASB16, SLURP1, NF-AT5, PHOGRIN, NANOS2, NHE3, SNAP47, CARD7, PSMD14, Tyro3, MICALCL, Tenascin-X, p90RSK3(RPS6KA2), VPS13A, AFAP, HLA-A68, PANX2, Rab-17, Enkephalin A, C17, SLAC2-B, GCN2, HLA-A2 (ICD), TBX5, AHRR, ODZ2, Raptor, CatSper2, KLHL7, Tiam2, IFI17, NeuN, Cyclin L1, Mu-type opioid receptor, NRTN, Nucleoredoxin, BBAP, Ranbp 17, PGRP-S, APBA2BP, Ur…	0.0382478	0.204484	97	Carboxypeptidase H, BAD, NOX5, DAB1, QKI, TBCD, Collagen XXVI, Ski, NOX4, Paralemmin, PCGF1, ASB16, Neurotrimin, PTPR-delta, SLURP1, SLAP, NPR3, NF-AT5, MBL2, DYNC1I1, PHOGRIN, P/Q-type calcium channel alpha-1A subunit, Epimorphin, DKKL1, NHE3, CPT-1A, Syntaxin 1B, CARD7, Tyro3, HADHB, AFAP, PANX2, Rab-17, GluR1, MTG16 (CBFA2T3), TRIM29, 1B35_HUMAN, SLA/LP, GRIK4, 1B57_HUMAN, GCN2, PRAS40, GLI-2,…	0.0871428	0.35108	342	FOXI2, SCAP2, ARHGAP20, Myosin ID, PCDHA4, Collagen XXIII, ERR3, SIX2, ATP6V1G1, AP-2A, CIDE-B, MBL2, ZC3HAV1, MSH4, MILI, CCBL2, Plectin 1, ITGA10, Septin 8, Tissue factor, Tenascin-X, PSMB1, MIWI, SNIP, Chapsyn-110, DYLX2, InPP5A, ZFP100, BMP8A, ERCC6, PKC-zeta, GCR-alpha, BETA-PIX, TBX5, FYCO1, MSX1, OMgp, HOXA5, SLIT3, NOVA2, C1orf35, Myomesin 2, PKR, Mucin 4, HCA112, Neurofibromin, Troponin …	0.0788891	0.30549	244	ROR-alpha, ATP5F1, ADAM12, TEF-1, LRFN2, MILI, CERT, NGL-1, RBP4, Septin 8, RIMS1, ARG2, DYLX2, L-type Ca(II) channel, alpha 1C subunit, PKC-zeta, Helios, ZNF205, Thrombopoietin, FYCO1, Protocadherin 15, Kv4.3 channel, Myomesin 2, MYO1H, PKR, UNC45B, Neurofibromin, Troponin T, cardiac, Nucleoredoxin, ASM3A, TAGLN2, USF1, IP3R1, Catenin alpha-3, STAG1, DOCK10, Beta TnTF, PRMT3, BAI1, GRID1, Myosin…	6.21971e-05	0.00839661	192	JKAP, BAD, HLA-A2, NOX5, QKI, Collagen XXVI, Ski, NOX4, Paralemmin, ASB16, PTPR-delta, SLURP1, NPR3, NF-AT5, MBL2, PHOGRIN, Epimorphin, NANOS2, DKKL1, NHE3, SNAP47, CARD7, PSMD14, Tyro3, MICALCL, Tenascin-X, p90RSK3(RPS6KA2), HLA-A68, VPS13A, AFAP, PANX2, Rab-17, Enkephalin A, TRIM29, C17, GRIK4, SLAC2-B, 1B57_HUMAN, GCN2, HLA-A2 (ICD), PRAS40, TBX5, AHRR, ODZ2, Raptor, HLA-B7, CatSper2, KLHL7, T…	0.0951241	0.360479	476	SCAP2, FOXI2, ARHGAP20, SIX2, ATP6V1G1, TEF-1, MBL2, MILI, CERT, NGL-1, Plectin 1, Septin 8, PSMB1, MIWI, Chapsyn-110, InPP5A, L-type Ca(II) channel, alpha 1C subunit, BMP8A, ERCC6, PKC-zeta, BETA-PIX, Helios, ZNF205, MSX1, FYCO1, OMgp, SLIT3, NOVA2, Kv4.3 channel, Myomesin 2, Mucin 4, HCA112, Neurofibromin, NPFF receptor 2, SPRED3, NDRG1, TRN2, ASM3A, TAGLN2, IP3R1, TAP1 (PSF1), CNTN1 (F3), Cate…
2	GTPase regulator activity	462	0.000217771	0.0258837	0.171362	0.381205	9	ST5, Tiam2, TBCD, cAMP-GEFII, CENTG2, TUSC4, HTR2B, B-chimaerin, TBC1D17	0.0647793	0.23637	8	TBCD, CENTG2, NPRL3, ACM3, ST5, Tiam2, Ephexin, B-chimaerin	0.00182943	0.0635255	29	ARHGAP20, BETA-PIX, DENND1C, Neurofibromin, BPGAP1, ARHGAP12, TBCD, MAPRE3(EB3), HMHA1, RHG7, RASAL3, LyGDI, IQSEC1, ARCGAP22, RGL3, Centaurin alpha 1, RGS14, CDEP, PRR5, RGS16, OBSCN, RASA3, STARD13, PSD3, PIKE(CENTG1), ARHGEF10, ABR, p190RhoGAP, CENTB5	0.000217771	0.0258837	25	RIMS1, Neurofibromin, DOCK10, ARHGAP12, TBCD, MAPRE3(EB3), IQSEC1, ARCGAP22, RGL3, B-chimaerin, Centaurin alpha 1, RGS14, MTMR13, CDEP, Tiam2, RGS16, OBSCN, RASA3, STARD13, PSD3, ARHGEF10, ACM3, ABR, CENTB5, DOCK4	0.104395	0.303735	12	NPRL3, ST5, Tiam2, Ephexin, TBCD, cAMP-GEFII, CENTG2, TUSC4, ACM3, HTR2B, B-chimaerin, TBC1D17	0.0044304	0.156571	36	ARHGAP20, BETA-PIX, DENND1C, Neurofibromin, RHG7, LyGDI, ARCGAP22, RGL3, Centaurin alpha 1, MTMR13, OBSCN, PSD3, PIKE(CENTG1), ABR, RIMS1, BPGAP1, DOCK10, ARHGAP12, TBCD, MAPRE3(EB3), HMHA1, RASAL3, IQSEC1, B-chimaerin, RGS14, CDEP, Tiam2, PRR5, RGS16, RASA3, STARD13, ARHGEF10, ACM3, p190RhoGAP, CENTB5, DOCK4
3	nucleoside-triphosphatase regulator activity	477	0.000352178	0.0304883	0.194414	0.398557	9	ST5, Tiam2, TBCD, cAMP-GEFII, CENTG2, TUSC4, HTR2B, B-chimaerin, TBC1D17	0.0748982	0.249385	8	TBCD, CENTG2, NPRL3, ACM3, ST5, Tiam2, Ephexin, B-chimaerin	0.00149238	0.0556602	30	ARHGAP20, BETA-PIX, DENND1C, Neurofibromin, BPGAP1, ARHGAP12, TBCD, MAPRE3(EB3), HMHA1, RHG7, RASAL3, LyGDI, IQSEC1, ARCGAP22, RGL3, DNAJB6 (Hdj-1), Centaurin alpha 1, RGS14, CDEP, PRR5, RGS16, OBSCN, RASA3, STARD13, PSD3, PIKE(CENTG1), ARHGEF10, ABR, p190RhoGAP, CENTB5	0.000352178	0.0304883	25	RIMS1, Neurofibromin, DOCK10, ARHGAP12, TBCD, MAPRE3(EB3), IQSEC1, ARCGAP22, RGL3, B-chimaerin, Centaurin alpha 1, RGS14, MTMR13, CDEP, Tiam2, RGS16, OBSCN, RASA3, STARD13, PSD3, ARHGEF10, ACM3, ABR, CENTB5, DOCK4	0.123576	0.3246	12	NPRL3, ST5, Tiam2, Ephexin, TBCD, cAMP-GEFII, CENTG2, TUSC4, ACM3, HTR2B, B-chimaerin, TBC1D17	0.00425095	0.156571	37	ARHGAP20, BETA-PIX, DENND1C, Neurofibromin, RHG7, LyGDI, ARCGAP22, RGL3, DNAJB6 (Hdj-1), Centaurin alpha 1, MTMR13, OBSCN, PSD3, PIKE(CENTG1), ABR, RIMS1, BPGAP1, DOCK10, ARHGAP12, TBCD, MAPRE3(EB3), HMHA1, RASAL3, IQSEC1, B-chimaerin, RGS14, CDEP, Tiam2, PRR5, RGS16, RASA3, STARD13, ARHGEF10, ACM3, p190RhoGAP, CENTB5, DOCK4
4	small GTPase regulator activity	320	0.000399592	0.0304883	0.141253	0.339068	7	ST5, Tiam2, cAMP-GEFII, CENTG2, HTR2B, B-chimaerin, TBC1D17	0.174507	0.377441	5	CENTG2, ST5, Tiam2, Ephexin, B-chimaerin	0.00450012	0.116535	21	BETA-PIX, DENND1C, Neurofibromin, BPGAP1, MAPRE3(EB3), RHG7, RASAL3, LyGDI, IQSEC1, RGL3, Centaurin alpha 1, RGS14, CDEP, OBSCN, RASA3, PSD3, PIKE(CENTG1), ARHGEF10, ABR, p190RhoGAP, CENTB5	0.000399592	0.0304883	19	RIMS1, Neurofibromin, DOCK10, MAPRE3(EB3), IQSEC1, RGL3, B-chimaerin, Centaurin alpha 1, RGS14, MTMR13, CDEP, Tiam2, OBSCN, RASA3, PSD3, ARHGEF10, ABR, CENTB5, DOCK4	0.189102	0.396335	8	ST5, Tiam2, Ephexin, cAMP-GEFII, CENTG2, HTR2B, B-chimaerin, TBC1D17	0.00457214	0.156571	27	BETA-PIX, DENND1C, Neurofibromin, RHG7, LyGDI, RGL3, Centaurin alpha 1, MTMR13, OBSCN, PSD3, PIKE(CENTG1), ABR, RIMS1, BPGAP1, DOCK10, MAPRE3(EB3), RASAL3, IQSEC1, B-chimaerin, RGS14, CDEP, Tiam2, RASA3, ARHGEF10, p190RhoGAP, CENTB5, DOCK4
5	cell adhesion molecule binding	76	0.000684131	0.025155	0.272438	0.486083	2	ODZ2, Carboxypeptidase H	0.000684131	0.025155	5	Carboxypeptidase H, PTPR-delta, ODZ2, ITGB3, CD1d	0.127528	0.370818	5	NDRG1, Neurexin 1-alpha, Alpha-N-catenin, Neurexin 1-beta, Alpha-1 catenin	0.0397584	0.261872	5	Catenin alpha-3, Neurexin 1-alpha, H-cadherin, Neurexin 1-beta, FGFR1	0.0100366	0.114826	5	PTPR-delta, ODZ2, CD1d, Carboxypeptidase H, ITGB3	0.0328882	0.267673	8	NDRG1, Catenin alpha-3, Neurexin 1-alpha, H-cadherin, Alpha-N-catenin, Neurexin 1-beta, Alpha-1 catenin, FGFR1
6	GTPase activator activity	260	0.000865454	0.0493408	0.0622018	0.244777	7	Tiam2, TBCD, CENTG2, TUSC4, HTR2B, B-chimaerin, TBC1D17	0.0933262	0.272012	5	TBCD, CENTG2, NPRL3, Tiam2, B-chimaerin	0.000865454	0.0493408	20	ARHGAP20, Neurofibromin, BPGAP1, ARHGAP12, TBCD, HMHA1, RHG7, RASAL3, LyGDI, ARCGAP22, Centaurin alpha 1, RGS14, PRR5, RGS16, RASA3, STARD13, PIKE(CENTG1), ABR, p190RhoGAP, CENTB5	0.00537771	0.0860433	14	Neurofibromin, ARHGAP12, TBCD, ARCGAP22, B-chimaerin, Centaurin alpha 1, RGS14, Tiam2, RGS16, RASA3, STARD13, ABR, CENTB5, DOCK4	0.0816995	0.264637	8	NPRL3, Tiam2, TBCD, CENTG2, TUSC4, HTR2B, B-chimaerin, TBC1D17	0.00483323	0.160739	23	ARHGAP20, Neurofibromin, RHG7, LyGDI, ARCGAP22, Centaurin alpha 1, PIKE(CENTG1), ABR, BPGAP1, ARHGAP12, TBCD, HMHA1, RASAL3, B-chimaerin, RGS14, Tiam2, PRR5, RGS16, RASA3, STARD13, p190RhoGAP, CENTB5, DOCK4
7	binding	13233	0.00153142	0.0424173	0.0673704	0.250294	187	JKAP, SLC7A9, Cadherin 22, HLA-A2, NOX5, Ski, NOX4, Paralemmin, ASB16, SLURP1, NF-AT5, PHOGRIN, NANOS2, NHE3, PFKP, PCDHB4, SNAP47, CARD7, PSMD14, Tyro3, MICALCL, PDE10A, Tenascin-X, p90RSK3(RPS6KA2), VPS13A, AFAP, HLA-A68, PANX2, Rab-17, Enkephalin A, C17, SLAC2-B, ASCT2 (SLC1A5), ARSB, GCN2, HLA-A2 (ICD), TBX5, AHRR, ODZ2, Raptor, CatSper2, KLHL7, Tiam2, IFI17, NeuN, Cyclin L1, Mu-type opioid r…	0.00153142	0.0430599	136	Carboxypeptidase H, BAD, MLC1F, Cadherin 22, NOX5, GANP, DAB1, QKI, TBCD, Collagen XXVI, Ski, NOX4, Paralemmin, SFRS8, PCGF1, CLYBL, ASB16, Neurotrimin, PTPR-delta, SLURP1, SLAP, NPR3, NF-AT5, MBL2, ZNF25, OMA1, DYNC1I1, PHOGRIN, P/Q-type calcium channel alpha-1A subunit, Epimorphin, ZFYVE19, DKKL1, CENTG2, NHE3, CPT-1A, PFKP, Syntaxin 1B, CARD7, Tyro3, NAD synthetase 1, HADHB, ZNF397, AFAP, PANX…	0.00755225	0.118889	486	PCDHA8, FOXI2, SCAP2, ARHGAP20, Myosin ID, TDH, PCDHA4, MGMT, Collagen XXIII, ERR3, SIX2, ATP6V1G1, AP-2A, HEPHL1, CUTL2, CIDE-B, ZAN, DNAH5, LMTK3, MBL2, ZC3HAV1, MSH4, MILI, ZNF121, CCBL2, Plectin 1, ITGA10, Septin 8, Tissue factor, HOXC5, Tenascin-X, PSMB1, Dppa5, MIWI, SNIP, Chapsyn-110, DYLX2, InPP5A, ZFP100, BMP8A, ERCC6, PKC-zeta, GCR-alpha, BETA-PIX, PRG2, TBX5, FYCO1, MSX1, OMgp, NR3B, H…	0.00200977	0.0612281	349	MGMT, ROR-alpha, ATP5F1, HEPHL1, PERT, ADAM12, TEF-1, LRFN2, MILI, PLA2G4E, CERT, NGL-1, RBP4, Septin 8, RIMS1, ARG2, VLCSH1, ZNF682, DYLX2, L-type Ca(II) channel, alpha 1C subunit, PKC-zeta, Basonuclin-2, Cadherin 18 (or 14), type II, Helios, ZNF205, Thrombopoietin, FYCO1, RecQL4, RALYL, UNC13C, Protocadherin 15, GFPT2, Kv4.3 channel, PDE6B, Myomesin 2, ZNF555, MYO1H, PKR, FUCO, UNC45B, Neurofib…	0.00167244	0.0424173	247	JKAP, SLC7A9, BAD, Cadherin 22, HLA-A2, NOX5, QKI, Collagen XXVI, Ski, NOX4, Paralemmin, SFRS8, ASB16, PTPR-delta, SLURP1, NPR3, NF-AT5, MBL2, OMA1, PHOGRIN, Epimorphin, NANOS2, DKKL1, NHE3, PFKP, PCDHB4, SNAP47, CARD7, PSMD14, Tyro3, MICALCL, PDE10A, Tenascin-X, p90RSK3(RPS6KA2), HLA-A68, VPS13A, AFAP, PANX2, Rab-17, Enkephalin A, LRAT, TRIM29, C17, GRIK4, SLAC2-B, 1B57_HUMAN, ASCT2 (SLC1A5), AR…	0.00219446	0.104282	682	SCAP2, FOXI2, ARHGAP20, TDH, MGMT, SIX2, ATP6V1G1, CUTL2, TEF-1, DNAH5, LMTK3, MBL2, MILI, CERT, NGL-1, Plectin 1, Septin 8, HOXC5, PSMB1, MIWI, Chapsyn-110, InPP5A, L-type Ca(II) channel, alpha 1C subunit, BMP8A, ERCC6, PKC-zeta, BETA-PIX, Cadherin 18 (or 14), type II, Helios, ZNF205, MSX1, FYCO1, RecQL4, OMgp, NR3B, RALYL, SLIT3, UNC13C, NOVA2, Kv4.3 channel, PDE6B, UXS1, Myomesin 2, ZNF555, Mu…
8	calcium-dependent protein binding	54	0.00264908	0.0889207	0.164151	0.372032	2	S100B, S100P	0.0887752	0.261942	2	MBL2, Epimorphin	0.00264908	0.0889207	7	Myosin ID, MBL2, Beta TnTF, Neurexin 1-alpha, S100B, S100P, Neurexin 1-beta	0.148458	0.36761	3	Beta TnTF, Neurexin 1-alpha, Neurexin 1-beta	0.0139226	0.132266	4	MBL2, Epimorphin, S100B, S100P	0.0160938	0.199052	7	MBL2, Beta TnTF, Neurexin 1-alpha, S100P, Myosin ID, S100B, Neurexin 1-beta
9	phosphoric ester hydrolase activity	372	0.00530699	0.0860433	0.0293343	0.185153	10	JKAP, PHOGRIN, PDE10A, PLD6, FLJ32658, IAP, HTR2A, PLC-beta3, HTR2B, PLAP-like	0.450546	0.644794	4	PTPR-delta, PHOGRIN, ACM3, PTPR-sigma	0.104769	0.358336	18	InPP5A, PDE6B, ASM3A, PTG, Ublcp1, PDE4B, CCKBR, Neutral sphingomyelinase, JKAP, SYNJ2, PHOGRIN, EYA4, PIP5KIII, PON1, EDNRA, PPP1R3B, PPM1L, SHIP	0.00530699	0.0860433	18	PHL1, PDE6B, ASM3A, TIGAR (C12orf5), PLCXD2, CCKBR, SSH1L, SYNJ2, PHOGRIN, MTMR13, PTPRV (ESP), PTPR-gamma, PON1, PPM1L, HTR2A, ACM3, SHIP, PLCL2	0.0127333	0.130227	13	JKAP, PTPR-delta, PHOGRIN, PDE10A, PLD6, FLJ32658, IAP, HTR2A, ACM3, PLC-beta3, HTR2B, PTPR-sigma, PLAP-like	0.0171126	0.202591	28	InPP5A, PDE6B, ASM3A, TIGAR (C12orf5), SYNJ2, MTMR13, EYA4, PTPRV (ESP), PTPR-gamma, PPP1R3B, SHIP, PHL1, PTG, Ublcp1, PDE4B, PLCXD2, CCKBR, Neutral sphingomyelinase, JKAP, SSH1L, PHOGRIN, PIP5KIII, PON1, EDNRA, PPM1L, HTR2A, ACM3, PLCL2
10	calcium ion binding	755	0.013557	0.117029	0.013557	0.117029	18	Cadherin 22, NOX5, PCDHB4, APBA2BP, PCDH21, LRP1B, LRP1B (ICD), UMODL1, MLC1F, FLJ32658, DMP4, PLC-beta3, Ryanodine receptor 1, CEP-68, CALP, LRP1B (CTF), S100B, S100P	0.39653	0.597905	8	MLC1F, Cadherin 22, NOX5, MBL2, NELL1, PCDH21, UMODL1, CALP	0.112155	0.370818	33	PCDHA8, PCDHA4, MGMT, MBL2, SLIT3, PCDHA1, PCDHA2, Thrombospondin 1, UMODL1, Neurexin 1-alpha, DMP4, PCDHB8, PCDHA3, PCDA7, Alpha-actinin 2, S100B, S100P, PCDHGB4, Neurexin 1-beta, PCDHA6, LTBP4, PLSCR4, SLIT1, CaMKK2, MLC1F, PON1, CDH20, PCDHA5(CNR6), PLA2G1B, PCDHB7, Pcdha9, CEP-68, PCDHB11	0.0551612	0.279842	26	MGMT, PERT, Cadherin 18 (or 14), type II, Protocadherin 15, FLG2, UMODL1, Neurexin 1-alpha, Filaggrin, PCDHAC1, DMP4, H-cadherin, STIM1, NELL1, PCDA7, PCDHGB4, PCDHAC2, Neurexin 1-beta, CELSR1, PON1, CDH20, NELL2, PLCL2, PLA2G1B, CALML6, CALP, AP1GBP1	0.0379456	0.218917	20	Cadherin 22, NOX5, MBL2, PCDHB4, APBA2BP, PCDH21, LRP1B, LRP1B (ICD), UMODL1, MLC1F, FLJ32658, DMP4, PLC-beta3, NELL1, Ryanodine receptor 1, CEP-68, CALP, LRP1B (CTF), S100B, S100P	0.0289111	0.254943	49	MGMT, MBL2, Cadherin 18 (or 14), type II, SLIT3, UMODL1, Neurexin 1-alpha, Filaggrin, PCDHAC1, DMP4, H-cadherin, PCDHA3, STIM1, PCDA7, Alpha-actinin 2, S100P, PCDHA6, LTBP4, PLSCR4, CELSR1, NELL2, PCDHA5(CNR6), PLA2G1B, PCDHB7, Pcdha9, PCDHB11, PCDHA8, PCDHA4, PERT, Protocadherin 15, PCDHA1, FLG2, PCDHA2, Thrombospondin 1, PCDHB8, NELL1, S100B, PCDHGB4, PCDHAC2, Neurexin 1-beta, SLIT1, CaMKK2, ML…
11	TFIIIC-class transcription factor binding	2	0.0183773	0.155454	0.0267181	0.174261	1	Raptor	0.0183773	0.155454	1	Raptor	0.0688325	0.328504	1	Raptor	0.0487863	0.261872	1	Raptor	0.0341824	0.202396	1	Raptor	0.0960039	0.360479	1	Raptor
12	protein-disulfide reductase activity	2	0.0183773	0.155454	0.0267181	0.174261	1	Nucleoredoxin	0.0183773	0.155454	1	Nucleoredoxin	0.0688325	0.328504	1	Nucleoredoxin	0.0487863	0.261872	1	Nucleoredoxin	0.0341824	0.202396	1	Nucleoredoxin	0.0960039	0.360479	1	Nucleoredoxin

## Sheet: table8_GO_processes
Genes_mapping _to_best_explained_by_Genotype_CpG-SNP_Pairs_GOProcess
Enrichment analysis report
Enrichment by GO Processes					M1CpG_gene_genelist				M1SNP_gene_genelist				M4CpG_gene_genelist				M4SNP_gene_genelist				M1all_gene_genelist				M4all_gene(1)_genelist
#	Processes	Total	min(pValue)	Min FDR	p-value	FDR	In Data	Network Objects from Active Data	p-value	FDR	In Data	Network Objects from Active Data	p-value	FDR	In Data	Network Objects from Active Data	p-value	FDR	In Data	Network Objects from Active Data	p-value	FDR	In Data	Network Objects from Active Data	p-value	FDR	In Data	Network Objects from Active Data
1	system development	3988	5.43746e-13	2.97973e-09	0.00523407	0.190047	70	Cadherin 22, HLA-DQB1, NOX5, Ski, NOX4, Paralemmin, PCDHB4, Tyro3, p90RSK3(RPS6KA2), VPS13A, Rab-17, C17, SLAC2-B, ARSB, TBX5, ODZ2, Mu-type opioid receptor, NRTN, Nucleoredoxin, KIAA1853, Thyroglobulin, SIAT8D, WNT3, Myt1L, ODZ1, Kir1.1, HOXA3, PRKAR1B, LDB2, NDRG4, HOXD3, Carboxypeptidase H, MLC1F, SETDB1, LASS3, DMRT2, Neurotrimin, Fibromodulin, ENC1, cAMP-GEFII, P/Q-type calcium channel alpha…	0.000109302	0.00369802	58	Carboxypeptidase H, MLC1F, Cadherin 22, NOX5, DAB1, QKI, Ski, NOX4, Paralemmin, Neurotrimin, PTPR-delta, Fibromodulin, NPR3, P/Q-type calcium channel alpha-1A subunit, Epimorphin, NPRL3, Tyro3, NINJ2, Rab-17, GluR1, MTG16 (CBFA2T3), 1B35_HUMAN, 1B57_HUMAN, ARSB, GLI-2, ODZ2, HLA-B7, ACM3, CHD2, ITGB3, Ephexin, Astrotactin-1, Selenoprotein P, HLAB, CYP1A1, NRTN, Nucleoredoxin, PTPR-sigma, SH3TC2, …	4.94431e-10	7.92573e-07	203	PCDHA8, FOXI2, PCDHA4, MGMT, SIX2, AP-2A, MSH4, HOXC5, SNIP, Chapsyn-110, DYLX2, BMP8A, PKC-zeta, GCR-alpha, BETA-PIX, TBX5, MSX1, OMgp, HOXA5, SLIT3, PCDHA1, PDE6B, Mucin 4, Neurofibromin, Troponin T, cardiac, Nucleoredoxin, NDRG1, DLX5, MOG, PCDHA2, DEC1 (Stra13), Caspase-1, microRNA 125b-1, CNTN1 (F3), Caspr2, ZAP70, HOXB4, Thrombospondin 1, TIP30, HCN2, BAI1, BLOS1, MEL1, PRKAR1B, NCOA2 (GRIP…	2.2259e-05	0.0232829	131	CLMP, MGMT, ROR-alpha, DCDC2, PERT, TEF-1, CERT, PHL1, NGL-1, RBP4, ARG2, DYLX2, L-type Ca(II) channel, alpha 1C subunit, PKC-zeta, Basonuclin-2, Thrombopoietin, RecQL4, Protocadherin 15, PDE6B, UNC45B, Neurofibromin, Troponin T, cardiac, Nucleoredoxin, FLG2, TAGLN2, BAI1, Myosin X, PAX8, Maspin, SLC38A10, PAFAH alpha (LIS1), Formin, KIS, ACSL6, LASS3, ZNF406, GSH2, CRISPLD2, LRH1, Neurexin 1-alp…	8.99371e-05	0.0038764	96	Cadherin 22, HLA-DQB1, NOX5, QKI, Ski, NOX4, Paralemmin, PTPR-delta, NPR3, Epimorphin, PCDHB4, NPRL3, Tyro3, p90RSK3(RPS6KA2), VPS13A, Rab-17, C17, SLAC2-B, 1B57_HUMAN, ARSB, TBX5, ODZ2, HLA-B7, Ephexin, Selenoprotein P, Mu-type opioid receptor, HLAB, NRTN, Nucleoredoxin, KIAA1853, Thyroglobulin, SIAT8D, WNT3, Myt1L, ODZ1, Kir1.1, CD1d, HOXA3, PRKAR1B, LDB2, NDRG4, HOXD3, Carboxypeptidase H, MLC1…	5.43746e-13	2.97973e-09	281	FOXI2, CLMP, MGMT, DCDC2, SIX2, TEF-1, CERT, NGL-1, HOXC5, Chapsyn-110, L-type Ca(II) channel, alpha 1C subunit, BMP8A, PKC-zeta, BETA-PIX, MSX1, RecQL4, OMgp, SLIT3, PDE6B, Mucin 4, Neurofibromin, NDRG1, TAGLN2, MOG, microRNA 125b-1, CNTN1 (F3), Caspr2, HOXB4, TIP30, BLOS1, Maspin, Formin, ACSL6, ZNF406, HOXD12, GSH2, RHG7, Neurexin 1-alpha, CACNB2, Filaggrin, DSCAM, PCDHAC1, DMP4, ARCGAP22, GAT…
2	multicellular organismal development	4648	1.3349e-12	3.65762e-09	0.00276843	0.146445	81	JKAP, Cadherin 22, HLA-DQB1, NOX5, Ski, NOX4, Paralemmin, NANOS2, PCDHB4, Tyro3, MICALCL, p90RSK3(RPS6KA2), VPS13A, Rab-17, C17, SLAC2-B, ARSB, TBX5, ODZ2, CatSper2, IFI17, Mu-type opioid receptor, NRTN, Nucleoredoxin, KIAA1853, Thyroglobulin, SIAT8D, PLD6, WNT3, Myt1L, ODZ1, Kir1.1, HOXA3, PRKAR1B, LDB2, NDRG4, HOXD3, Carboxypeptidase H, MLC1F, SETDB1, LASS3, DMRT2, Neurotrimin, Fibromodulin, EN…	0.00123474	0.0305283	61	Carboxypeptidase H, MLC1F, Cadherin 22, NOX5, DAB1, QKI, Ski, NOX4, Paralemmin, Neurotrimin, PTPR-delta, Fibromodulin, NPR3, P/Q-type calcium channel alpha-1A subunit, Epimorphin, NPRL3, Tyro3, NINJ2, Rab-17, GluR1, MTG16 (CBFA2T3), LRAT, 1B35_HUMAN, 1B57_HUMAN, ARSB, GLI-2, ODZ2, HLA-B7, ACM3, CHD2, ITGB3, Ephexin, Astrotactin-1, Selenoprotein P, HLAB, CYP1A1, NRTN, Nucleoredoxin, PTPR-sigma, SH…	1.26639e-10	3.04503e-07	231	PCDHA8, FOXI2, PCDHA4, MGMT, ERR3, SIX2, AP-2A, MSH4, MILI, HOXC5, Dppa5, MIWI, SNIP, Chapsyn-110, DYLX2, BMP8A, PKC-zeta, GCR-alpha, BETA-PIX, TBX5, MSX1, OMgp, HOXA5, SLIT3, PCDHA1, CR1L, PDE6B, Mucin 4, Neurofibromin, Troponin T, cardiac, Nucleoredoxin, SPRED3, NDRG1, DLX5, MOG, PCDHA2, DEC1 (Stra13), Caspase-1, microRNA 125b-1, CNTN1 (F3), Caspr2, ZAP70, HOXB4, Thrombospondin 1, TIP30, HCN2, …	1.59307e-05	0.022218	149	CLMP, MGMT, ROR-alpha, DCDC2, PERT, TEF-1, MILI, CERT, PHL1, NGL-1, RBP4, ARG2, DYLX2, L-type Ca(II) channel, alpha 1C subunit, PKC-zeta, Basonuclin-2, Thrombopoietin, RecQL4, Protocadherin 15, CR1L, PDE6B, UNC45B, Neurofibromin, Troponin T, cardiac, Nucleoredoxin, FLG2, TAGLN2, IP3R1, BAI1, Myosin X, PAX8, ERG, Maspin, SLC38A10, CRIPTO-3, PAFAH alpha (LIS1), Formin, KIS, ACSL6, LASS3, Alpha-1D a…	0.0001113	0.00451161	108	JKAP, Cadherin 22, HLA-DQB1, NOX5, QKI, Ski, NOX4, Paralemmin, PTPR-delta, NPR3, Epimorphin, NANOS2, PCDHB4, NPRL3, Tyro3, MICALCL, p90RSK3(RPS6KA2), VPS13A, Rab-17, LRAT, C17, SLAC2-B, 1B57_HUMAN, ARSB, TBX5, ODZ2, HLA-B7, CatSper2, Ephexin, IFI17, Selenoprotein P, Mu-type opioid receptor, HLAB, NRTN, Nucleoredoxin, KIAA1853, Thyroglobulin, SIAT8D, PLD6, WNT3, Myt1L, ODZ1, Kir1.1, CD1d, HOXA3, P…	1.3349e-12	3.65762e-09	315	FOXI2, CLMP, MGMT, DCDC2, SIX2, TEF-1, MILI, CERT, NGL-1, HOXC5, MIWI, Chapsyn-110, L-type Ca(II) channel, alpha 1C subunit, BMP8A, PKC-zeta, BETA-PIX, MSX1, RecQL4, OMgp, SLIT3, PDE6B, Mucin 4, Neurofibromin, SPRED3, NDRG1, TAGLN2, MOG, IP3R1, microRNA 125b-1, CNTN1 (F3), Caspr2, HOXB4, TIP30, BLOS1, ASZ1, Maspin, Formin, ACSL6, ZNF406, HOXD12, GSH2, RHG7, Neurexin 1-alpha, CACNB2, Filaggrin, DS…
3	developmental process	5156	4.4221e-11	6.05827e-08	0.00125779	0.117996	90	JKAP, Cadherin 22, HLA-DQB1, NOX5, Ski, NOX4, Paralemmin, NANOS2, PCDHB4, Tyro3, MICALCL, p90RSK3(RPS6KA2), VPS13A, Rab-17, C17, SLAC2-B, ARSB, TBX5, ODZ2, CatSper2, IFI17, Mu-type opioid receptor, NRTN, Nucleoredoxin, Urocortin 2, CES1P1, PAR1, KIAA1853, Thyroglobulin, SIAT8D, PLD6, WNT3, Myt1L, ODZ1, Kir1.1, HOXA3, PRKAR1B, AKIP1, LDB2, NDRG4, HOXD3, Carboxypeptidase H, MLC1F, Casein kinase I (…	0.000768088	0.0211486	67	Carboxypeptidase H, MLC1F, Cadherin 22, KIAA1838, NOX5, DAB1, QKI, Ski, C19orf51, NOX4, Paralemmin, Neurotrimin, PTPR-delta, Fibromodulin, NPR3, P/Q-type calcium channel alpha-1A subunit, Epimorphin, DKKL1, NPRL3, Tyro3, NINJ2, Rab-17, GluR1, MTG16 (CBFA2T3), LRAT, 1B35_HUMAN, 1B57_HUMAN, ARSB, GLI-2, ODZ2, HLA-B7, ACM3, CHD2, ITGB3, Ephexin, Astrotactin-1, Cypher, Selenoprotein P, HLAB, CYP1A1, …	1.35155e-09	1.6249e-06	246	PCDHA8, FOXI2, PCDHA4, MGMT, ERR3, SIX2, AP-2A, MSH4, MILI, Plectin 1, Tissue factor, HOXC5, Dppa5, MIWI, SNIP, Chapsyn-110, DYLX2, BMP8A, PKC-zeta, MSRA, GCR-alpha, BETA-PIX, TBX5, MSX1, OMgp, HOXA5, SLIT3, PCDHA1, CR1L, PDE6B, Mucin 4, Neurofibromin, Troponin T, cardiac, Nucleoredoxin, SPRED3, NDRG1, DLX5, MOG, PCDHA2, DEC1 (Stra13), Caspase-1, microRNA 125b-1, CNTN1 (F3), Caspr2, ZAP70, HOXB4,…	0.000145143	0.037955	157	CLMP, MGMT, ROR-alpha, DCDC2, PERT, ADAM12, TEF-1, MILI, CERT, PHL1, NGL-1, RBP4, ARG2, DYLX2, L-type Ca(II) channel, alpha 1C subunit, PKC-zeta, Basonuclin-2, Thrombopoietin, RecQL4, Protocadherin 15, CR1L, PDE6B, UNC45B, Neurofibromin, Troponin T, cardiac, Nucleoredoxin, FLG2, TAGLN2, IP3R1, BAI1, Myosin X, PAX8, ERG, Maspin, SLC38A10, CRIPTO-3, G3PT, PAFAH alpha (LIS1), Formin, KIS, ACSL6, LAS…	2.93403e-05	0.00138755	120	JKAP, Cadherin 22, HLA-DQB1, KIAA1838, NOX5, QKI, Ski, C19orf51, NOX4, Paralemmin, PTPR-delta, NPR3, Epimorphin, NANOS2, DKKL1, PCDHB4, NPRL3, Tyro3, MICALCL, p90RSK3(RPS6KA2), VPS13A, Rab-17, LRAT, C17, SLAC2-B, 1B57_HUMAN, ARSB, TBX5, ODZ2, HLA-B7, CatSper2, Ephexin, IFI17, Selenoprotein P, Mu-type opioid receptor, HLAB, NRTN, Nucleoredoxin, Urocortin 2, CES1P1, PAR1, KIAA1853, Thyroglobulin, S…	4.4221e-11	6.05827e-08	335	FOXI2, CLMP, MGMT, DCDC2, SIX2, TEF-1, MILI, CERT, NGL-1, Plectin 1, HOXC5, MIWI, Chapsyn-110, L-type Ca(II) channel, alpha 1C subunit, BMP8A, PKC-zeta, MSRA, BETA-PIX, MSX1, RecQL4, OMgp, SLIT3, PDE6B, Mucin 4, Neurofibromin, SPRED3, NDRG1, TAGLN2, MOG, IP3R1, microRNA 125b-1, CNTN1 (F3), Caspr2, HOXB4, TIP30, BLOS1, ASZ1, Maspin, G3PT, Formin, ACSL6, ZNF406, HOXD12, GSH2, RHG7, Neurexin 1-alpha…
4	nervous system development	2138	1.73948e-10	1.69868e-07	0.0056498	0.195105	42	Cadherin 22, Ski, Paralemmin, PCDHB4, Tyro3, p90RSK3(RPS6KA2), VPS13A, Rab-17, ARSB, ODZ2, Mu-type opioid receptor, NRTN, KIAA1853, Thyroglobulin, SIAT8D, WNT3, Myt1L, ODZ1, HOXA3, NDRG4, HOXD3, Neurotrimin, ENC1, cAMP-GEFII, P/Q-type calcium channel alpha-1A subunit, IAP, Bcl-2, TBX20, NINJ2, MSK2, GLI-2, CECR2, GnRH1, Astrotactin-1, PAX3, PMCA4, RILP (REST-interacting LIM domain protein), GRHL2…	0.00106946	0.0272769	34	Cadherin 22, DAB1, QKI, Ski, Paralemmin, Neurotrimin, PTPR-delta, P/Q-type calcium channel alpha-1A subunit, Tyro3, NINJ2, Rab-17, GluR1, ARSB, GLI-2, ODZ2, ACM3, ITGB3, Ephexin, Astrotactin-1, Selenoprotein P, NRTN, PTPR-sigma, SH3TC2, KIAA1853, Thyroglobulin, NELL1, SIAT8D, MTGR1, Myt1L, Evi-1, DLL3, MACROD2, GABA-A receptor beta-3 subunit, NDRG4	7.34171e-08	3.20966e-05	119	PCDHA8, PCDHA4, AP-2A, SNIP, Chapsyn-110, DYLX2, PKC-zeta, GCR-alpha, BETA-PIX, MSX1, OMgp, SLIT3, PCDHA1, Neurofibromin, NDRG1, DLX5, MOG, PCDHA2, DEC1 (Stra13), CNTN1 (F3), Caspr2, HCN2, BAI1, BLOS1, MEL1, NCOA2 (GRIP1/TIF2), PAX8, KIAA1688, KIS, HOXB1, GCR-beta, MOBP, RHG7, Neurexin 1-alpha, Neuregulin 1, SHRM, ZFP57, Myelin basic protein, PCDHB8, CECR2, PCDHA3, PCSK9, LHX3, AHNAK, Ephrin-A re…	0.000120025	0.037955	77	ROR-alpha, DCDC2, NGL-1, DYLX2, L-type Ca(II) channel, alpha 1C subunit, PKC-zeta, Protocadherin 15, Neurofibromin, BAI1, Myosin X, PAX8, PAFAH alpha (LIS1), KIS, ACSL6, GSH2, Neurexin 1-alpha, CACNB2, Rab-40C, DSCAM, PCDHAC1, AHNAK, Bystin, ATP8A2, BMPR1A, MaxiK alpha subunit, NELL1, p73, TTC3, ZNF423, DMRT3, PCDA7, SMRT, CGAT1, SSH1L, PCDHAC2, SYNJ2, Neurexin 1-beta, RGS14, HDAC4, CLRN1, MTMR13…	0.000601604	0.019888	56	Cadherin 22, QKI, Ski, Paralemmin, PTPR-delta, PCDHB4, Tyro3, p90RSK3(RPS6KA2), VPS13A, Rab-17, ARSB, ODZ2, Ephexin, Selenoprotein P, Mu-type opioid receptor, NRTN, KIAA1853, Thyroglobulin, SIAT8D, WNT3, Myt1L, ODZ1, HOXA3, NDRG4, HOXD3, DAB1, Neurotrimin, ENC1, P/Q-type calcium channel alpha-1A subunit, cAMP-GEFII, IAP, Bcl-2, TBX20, NINJ2, GluR1, MSK2, GLI-2, CECR2, ACM3, ITGB3, GnRH1, Astrotac…	1.73948e-10	1.69868e-07	166	DCDC2, NGL-1, Chapsyn-110, L-type Ca(II) channel, alpha 1C subunit, PKC-zeta, BETA-PIX, MSX1, OMgp, SLIT3, Neurofibromin, NDRG1, MOG, CNTN1 (F3), Caspr2, BLOS1, ACSL6, GSH2, RHG7, Neurexin 1-alpha, CACNB2, DSCAM, PCDHAC1, ZFP57, Myelin basic protein, CECR2, PCDHA3, LHX3, AHNAK, ATP8A2, PAX3, BMPR1A, MaxiK alpha subunit, p73, DMRT3, PCDA7, ZNF238, CGAT1, HOXB2, HOXA1, NFIX, SYNJ2, HDAC4, CLRN1, NT…
5	anatomical structure development	4564	1.85986e-10	1.69868e-07	0.000994029	0.115732	82	Cadherin 22, HLA-DQB1, NOX5, Ski, NOX4, Paralemmin, NANOS2, PCDHB4, Tyro3, p90RSK3(RPS6KA2), VPS13A, Rab-17, C17, SLAC2-B, ARSB, TBX5, ODZ2, IFI17, Mu-type opioid receptor, NRTN, Nucleoredoxin, Urocortin 2, CES1P1, PAR1, KIAA1853, Thyroglobulin, SIAT8D, PLD6, WNT3, Myt1L, ODZ1, Kir1.1, HOXA3, PRKAR1B, AKIP1, LDB2, NDRG4, HOXD3, Carboxypeptidase H, MLC1F, Casein kinase I (alpha-like), SETDB1, LASS…	5.91663e-05	0.00207768	65	Carboxypeptidase H, MLC1F, Cadherin 22, NOX5, DAB1, QKI, Ski, C19orf51, NOX4, Paralemmin, Neurotrimin, PTPR-delta, Fibromodulin, NPR3, P/Q-type calcium channel alpha-1A subunit, Epimorphin, DKKL1, NPRL3, Tyro3, NINJ2, Rab-17, GluR1, MTG16 (CBFA2T3), LRAT, 1B35_HUMAN, 1B57_HUMAN, ARSB, GLI-2, ODZ2, HLA-B7, ACM3, CHD2, ITGB3, Ephexin, Astrotactin-1, Cypher, Selenoprotein P, HLAB, CYP1A1, NRTN, Nucl…	1.50637e-08	1.03488e-05	219	PCDHA8, FOXI2, PCDHA4, MGMT, SIX2, AP-2A, MSH4, MILI, Plectin 1, HOXC5, MIWI, SNIP, Chapsyn-110, DYLX2, BMP8A, PKC-zeta, GCR-alpha, BETA-PIX, TBX5, MSX1, OMgp, HOXA5, SLIT3, PCDHA1, CR1L, PDE6B, Mucin 4, Neurofibromin, Troponin T, cardiac, Nucleoredoxin, NDRG1, DLX5, MOG, PCDHA2, DEC1 (Stra13), Caspase-1, microRNA 125b-1, CNTN1 (F3), Caspr2, ZAP70, HOXB4, Thrombospondin 1, TIP30, HCN2, BAI1, BLOS…	0.000137263	0.037955	142	CLMP, MGMT, ROR-alpha, DCDC2, PERT, ADAM12, TEF-1, MILI, CERT, PHL1, NGL-1, RBP4, ARG2, DYLX2, L-type Ca(II) channel, alpha 1C subunit, PKC-zeta, Basonuclin-2, Thrombopoietin, RecQL4, Protocadherin 15, CR1L, PDE6B, UNC45B, Neurofibromin, Troponin T, cardiac, Nucleoredoxin, FLG2, TAGLN2, BAI1, Myosin X, PAX8, Maspin, SLC38A10, CRIPTO-3, G3PT, PAFAH alpha (LIS1), Formin, KIS, ACSL6, LASS3, ZNF406, …	9.79983e-06	0.00051336	111	Cadherin 22, HLA-DQB1, NOX5, QKI, Ski, C19orf51, NOX4, Paralemmin, PTPR-delta, NPR3, Epimorphin, NANOS2, DKKL1, PCDHB4, NPRL3, Tyro3, p90RSK3(RPS6KA2), VPS13A, Rab-17, LRAT, C17, SLAC2-B, 1B57_HUMAN, ARSB, TBX5, ODZ2, HLA-B7, Ephexin, IFI17, Selenoprotein P, Mu-type opioid receptor, HLAB, NRTN, Nucleoredoxin, Urocortin 2, CES1P1, PAR1, KIAA1853, Thyroglobulin, SIAT8D, PLD6, WNT3, Myt1L, ODZ1, Kir…	1.85986e-10	1.69868e-07	301	FOXI2, CLMP, MGMT, DCDC2, SIX2, TEF-1, MILI, CERT, NGL-1, Plectin 1, HOXC5, MIWI, Chapsyn-110, L-type Ca(II) channel, alpha 1C subunit, BMP8A, PKC-zeta, BETA-PIX, MSX1, RecQL4, OMgp, SLIT3, PDE6B, Mucin 4, Neurofibromin, NDRG1, TAGLN2, MOG, microRNA 125b-1, CNTN1 (F3), Caspr2, HOXB4, TIP30, BLOS1, ASZ1, Maspin, G3PT, Formin, ACSL6, ZNF406, HOXD12, GSH2, RHG7, Neurexin 1-alpha, CACNB2, Filaggrin, …
6	single-multicellular organism process	6314	5.2308e-10	4.09497e-07	0.000543471	0.0888535	108	JKAP, SLC7A9, FAM134B, Cadherin 22, HLA-DQB1, NOX5, Ski, NOX4, Paralemmin, NF-AT5, NANOS2, PCDHB4, HTR4, CARD7, Tyro3, MICALCL, PDE10A, Tenascin-X, p90RSK3(RPS6KA2), VPS13A, PANX2, Rab-17, Enkephalin A, C17, OR8D4, SLAC2-B, ARSB, TBX5, ODZ2, CatSper2, IFI17, Mu-type opioid receptor, NRTN, Nucleoredoxin, Urocortin 2, PAR1, KIAA1853, Thyroglobulin, SIAT8D, PCDH21, PLD6, APOC2, OR7A5, WNT3, Myt1L, O…	0.00280336	0.0595838	76	Carboxypeptidase H, FAM134B, MLC1F, Cadherin 22, NOX5, DAB1, QKI, Collagen XXVI, Ski, NOX4, Paralemmin, Neurotrimin, PTPR-delta, Fibromodulin, NPR3, NF-AT5, OMA1, P/Q-type calcium channel alpha-1A subunit, Epimorphin, Syntaxin 1B, NPRL3, CARD7, Tyro3, NINJ2, PANX2, Rab-17, GluR1, MTG16 (CBFA2T3), LRAT, 1B35_HUMAN, GRIK4, 1B57_HUMAN, ARSB, GLI-2, ODZ2, HLA-B7, CD244, ACM3, CHD2, ITGB3, Ephexin, As…	5.1812e-09	4.15273e-06	286	PCDHA8, FOXI2, PCDHA4, MGMT, Collagen XXIII, ERR3, SIX2, AP-2A, HEPHL1, ZAN, MSH4, MILI, Tissue factor, HOXC5, Tenascin-X, Dppa5, MIWI, SNIP, Chapsyn-110, LTBR2, DYLX2, BMP8A, ERCC6, PKC-zeta, GCR-alpha, BETA-PIX, TBX5, MSX1, Galpha(i)-specificTHR&S GPCR (motilin receptor), OMgp, NR3B, HOXA5, SLIT3, PCDHA1, CR1L, PDE6B, Myomesin 2, Mucin 4, Neurofibromin, Troponin T, cardiac, Nucleoredoxin, SPRED…	0.000211003	0.0465925	185	CLMP, MGMT, ROR-alpha, DCDC2, HEPHL1, PERT, TEF-1, MILI, CERT, PHL1, NGL-1, RBP4, RIMS1, ARG2, DYLX2, L-type Ca(II) channel, alpha 1C subunit, PKC-zeta, Basonuclin-2, Thrombopoietin, RecQL4, UNC13C, Protocadherin 15, CR1L, Kv4.3 channel, PDE6B, Myomesin 2, UNC45B, Neurofibromin, Troponin T, cardiac, Nucleoredoxin, FLG2, TAGLN2, IP3R1, Beta TnTF, BAI1, Myosin X, LMF1, PAX8, TUSC3, ERG, Maspin, SLC…	1.645e-05	0.000823711	142	JKAP, SLC7A9, FAM134B, Cadherin 22, HLA-DQB1, NOX5, QKI, Collagen XXVI, Ski, NOX4, Paralemmin, PTPR-delta, NPR3, NF-AT5, OMA1, Epimorphin, NANOS2, PCDHB4, HTR4, NPRL3, CARD7, Tyro3, MICALCL, PDE10A, Tenascin-X, p90RSK3(RPS6KA2), VPS13A, PANX2, Rab-17, Enkephalin A, LRAT, C17, OR8D4, GRIK4, SLAC2-B, 1B57_HUMAN, ARSB, TBX5, ODZ2, HLA-B7, CatSper2, Ephexin, IFI17, Selenoprotein P, Mu-type opioid rec…	5.2308e-10	4.09497e-07	389	FOXI2, CLMP, MGMT, DCDC2, SIX2, TEF-1, MILI, CERT, NGL-1, HOXC5, MIWI, Chapsyn-110, L-type Ca(II) channel, alpha 1C subunit, BMP8A, ERCC6, PKC-zeta, BETA-PIX, MSX1, RecQL4, Galpha(i)-specificTHR&S GPCR (motilin receptor), OMgp, NR3B, SLIT3, UNC13C, Kv4.3 channel, PDE6B, Myomesin 2, Mucin 4, Neurofibromin, SPRED3, NDRG1, TAGLN2, MOG, IP3R1, microRNA 125b-1, CNTN1 (F3), Caspr2, HOXB4, Beta TnTF, TI…
7	single-organism developmental process	3921	1.78861e-09	1.2252e-06	0.00807114	0.222815	68	Cadherin 22, HLA-DQB1, NOX5, Ski, NOX4, Paralemmin, NANOS2, Tyro3, p90RSK3(RPS6KA2), C17, SLAC2-B, TBX5, ODZ2, IFI17, NRTN, Urocortin 2, Thyroglobulin, SIAT8D, PLD6, WNT3, Kir1.1, HOXA3, PRKAR1B, AKIP1, LDB2, NDRG4, HOXD3, Carboxypeptidase H, MLC1F, Casein kinase I (alpha-like), SETDB1, DMRT2, Neurotrimin, Fibromodulin, cAMP-GEFII, P/Q-type calcium channel alpha-1A subunit, DPPA3, IAP, Bcl-2, TBX…	0.0078474	0.124161	50	Carboxypeptidase H, MLC1F, Cadherin 22, NOX5, DAB1, QKI, Ski, C19orf51, NOX4, Paralemmin, Neurotrimin, Fibromodulin, P/Q-type calcium channel alpha-1A subunit, Epimorphin, NPRL3, Tyro3, NINJ2, MTG16 (CBFA2T3), LRAT, 1B35_HUMAN, 1B57_HUMAN, GLI-2, ODZ2, HLA-B7, CHD2, ITGB3, Cypher, Selenoprotein P, HLAB, CYP1A1, NRTN, B-chimaerin, PTPR-sigma, SH3TC2, G-protein alpha-12, Thyroglobulin, SIAT8D, 1B08…	4.74834e-08	2.5372e-05	192	FOXI2, PCDHA4, MGMT, SIX2, AP-2A, MSH4, MILI, Tissue factor, HOXC5, MIWI, SNIP, Chapsyn-110, BMP8A, PKC-zeta, MSRA, GCR-alpha, TBX5, MSX1, OMgp, HOXA5, SLIT3, CR1L, PDE6B, Mucin 4, Neurofibromin, Troponin T, cardiac, NDRG1, DLX5, Caspase-1, microRNA 125b-1, CNTN1 (F3), Caspr2, ZAP70, HOXB4, Thrombospondin 1, TIP30, HCN2, BAI1, BLOS1, MEL1, PRKAR1B, NCOA2 (GRIP1/TIF2), TCF21, PAX8, ASZ1, KIAA1688,…	0.0011743	0.0926676	120	CLMP, MGMT, ROR-alpha, DCDC2, PERT, ADAM12, TEF-1, MILI, CERT, PHL1, RBP4, ARG2, L-type Ca(II) channel, alpha 1C subunit, PKC-zeta, Basonuclin-2, Thrombopoietin, RecQL4, Protocadherin 15, CR1L, PDE6B, UNC45B, Neurofibromin, Troponin T, cardiac, TAGLN2, BAI1, Myosin X, PAX8, Maspin, SLC38A10, CRIPTO-3, G3PT, PAFAH alpha (LIS1), Formin, KIS, ACSL6, Alpha-1D adrenergic receptor, ZNF406, GSH2, CRISPL…	0.0013971	0.0406591	89	Cadherin 22, HLA-DQB1, NOX5, QKI, Ski, C19orf51, NOX4, Paralemmin, Epimorphin, NANOS2, NPRL3, Tyro3, p90RSK3(RPS6KA2), LRAT, C17, SLAC2-B, 1B57_HUMAN, TBX5, ODZ2, HLA-B7, IFI17, Selenoprotein P, HLAB, NRTN, Urocortin 2, Thyroglobulin, SIAT8D, PLD6, WNT3, Kir1.1, CD1d, HOXA3, PRKAR1B, AKIP1, LDB2, NDRG4, HOXD3, Carboxypeptidase H, MLC1F, DAB1, Casein kinase I (alpha-like), SETDB1, DMRT2, Neurotrim…	1.78861e-09	1.2252e-06	262	FOXI2, CLMP, MGMT, DCDC2, SIX2, TEF-1, MILI, CERT, HOXC5, MIWI, Chapsyn-110, L-type Ca(II) channel, alpha 1C subunit, BMP8A, PKC-zeta, MSRA, MSX1, RecQL4, OMgp, SLIT3, PDE6B, Mucin 4, Neurofibromin, NDRG1, TAGLN2, microRNA 125b-1, CNTN1 (F3), Caspr2, HOXB4, TIP30, BLOS1, ASZ1, Maspin, G3PT, Formin, ACSL6, ZNF406, HOXD12, GSH2, RHG7, Neurexin 1-alpha, CACNB2, DSCAM, DMP4, ARCGAP22, GATA-4, ZFP57, …
8	multicellular organismal process	6570	1.03373e-08	4.72072e-06	0.0011071	0.116436	110	JKAP, SLC7A9, FAM134B, Cadherin 22, HLA-DQB1, NOX5, Ski, NOX4, Paralemmin, NF-AT5, NANOS2, PCDHB4, HTR4, CARD7, Tyro3, MICALCL, PDE10A, Tenascin-X, p90RSK3(RPS6KA2), VPS13A, PANX2, Rab-17, Enkephalin A, C17, OR8D4, SLAC2-B, ARSB, TBX5, ODZ2, CatSper2, IFI17, Mu-type opioid receptor, NRTN, Nucleoredoxin, Urocortin 2, PAR1, KIAA1853, Thyroglobulin, SIAT8D, PCDH21, PLD6, APOC2, OR7A5, WNT3, Myt1L, O…	0.005675	0.0968347	77	Carboxypeptidase H, FAM134B, MLC1F, Cadherin 22, NOX5, DAB1, QKI, Collagen XXVI, Ski, NOX4, Paralemmin, Neurotrimin, PTPR-delta, Fibromodulin, NPR3, NF-AT5, OMA1, P/Q-type calcium channel alpha-1A subunit, Epimorphin, Syntaxin 1B, NPRL3, CARD7, Tyro3, NINJ2, PANX2, Rab-17, GluR1, MTG16 (CBFA2T3), LRAT, 1B35_HUMAN, GRIK4, 1B57_HUMAN, ARSB, GLI-2, ODZ2, HLA-B7, CD244, ACM3, CHD2, ITGB3, Ephexin, As…	6.42551e-08	3.09003e-05	290	PCDHA8, FOXI2, PCDHA4, MGMT, Collagen XXIII, ERR3, SIX2, AP-2A, HEPHL1, ZAN, MSH4, MILI, Plectin 1, Tissue factor, HOXC5, Tenascin-X, Dppa5, MIWI, SNIP, Chapsyn-110, LTBR2, DYLX2, BMP8A, ERCC6, PKC-zeta, GCR-alpha, BETA-PIX, TBX5, MSX1, Galpha(i)-specificTHR&S GPCR (motilin receptor), OMgp, NR3B, HOXA5, SLIT3, PCDHA1, CR1L, PDE6B, Myomesin 2, Mucin 4, Neurofibromin, Troponin T, cardiac, Nucleored…	0.000714403	0.0711682	188	CLMP, MGMT, ROR-alpha, DCDC2, HEPHL1, PERT, TEF-1, MILI, CERT, PHL1, NGL-1, RBP4, RIMS1, ARG2, DYLX2, L-type Ca(II) channel, alpha 1C subunit, PKC-zeta, Basonuclin-2, Thrombopoietin, RecQL4, UNC13C, Protocadherin 15, CR1L, Kv4.3 channel, PDE6B, Myomesin 2, UNC45B, Neurofibromin, Troponin T, cardiac, Nucleoredoxin, FLG2, TAGLN2, IP3R1, WDR33, Beta TnTF, BAI1, Myosin X, LMF1, PAX8, TUSC3, ERG, Masp…	5.93536e-05	0.00259101	144	JKAP, SLC7A9, FAM134B, Cadherin 22, HLA-DQB1, NOX5, QKI, Collagen XXVI, Ski, NOX4, Paralemmin, PTPR-delta, NPR3, NF-AT5, OMA1, Epimorphin, NANOS2, PCDHB4, HTR4, NPRL3, CARD7, Tyro3, MICALCL, PDE10A, Tenascin-X, p90RSK3(RPS6KA2), VPS13A, PANX2, Rab-17, Enkephalin A, LRAT, C17, OR8D4, GRIK4, SLAC2-B, 1B57_HUMAN, ARSB, TBX5, ODZ2, HLA-B7, CatSper2, Ephexin, IFI17, Selenoprotein P, Mu-type opioid rec…	1.03373e-08	4.72072e-06	395	FOXI2, CLMP, MGMT, DCDC2, SIX2, TEF-1, MILI, CERT, NGL-1, Plectin 1, HOXC5, MIWI, Chapsyn-110, L-type Ca(II) channel, alpha 1C subunit, BMP8A, ERCC6, PKC-zeta, BETA-PIX, MSX1, RecQL4, Galpha(i)-specificTHR&S GPCR (motilin receptor), OMgp, NR3B, SLIT3, UNC13C, Kv4.3 channel, PDE6B, Myomesin 2, Mucin 4, Neurofibromin, SPRED3, NDRG1, TAGLN2, MOG, IP3R1, microRNA 125b-1, CNTN1 (F3), WDR33, Caspr2, HO…
9	cell differentiation	3043	8.62595e-08	3.37644e-05	0.00200418	0.134895	58	HLA-DQB1, Ski, NOX4, Paralemmin, NANOS2, Tyro3, MICALCL, p90RSK3(RPS6KA2), Rab-17, C17, SLAC2-B, TBX5, ODZ2, CatSper2, Mu-type opioid receptor, NRTN, Nucleoredoxin, KIAA1853, SIAT8D, PLD6, WNT3, Myt1L, AKIP1, LDB2, NDRG4, HOXD3, LASS3, Neurotrimin, cAMP-GEFII, P/Q-type calcium channel alpha-1A subunit, IAP, Bcl-2, TBX20, DMP4, ANKRD2, MTG16 (CBFA2T3), MSK2, GLI-2, CECR2, GnRH1, DACT2, Astrotactin…	0.0302443	0.249259	38	KIAA1838, DAB1, QKI, Ski, NOX4, Paralemmin, Neurotrimin, PTPR-delta, P/Q-type calcium channel alpha-1A subunit, Epimorphin, Tyro3, Rab-17, MTG16 (CBFA2T3), GLI-2, ODZ2, CHD2, ITGB3, Ephexin, Astrotactin-1, Cypher, CYP1A1, NRTN, Nucleoredoxin, B-chimaerin, SH3TC2, G-protein alpha-12, KIAA1853, NELL1, SIAT8D, MTGR1, Myt1L, Evi-1, DLL3, CD1d, GABA-A receptor beta-3 subunit, HEPH, LDB2, NDRG4	3.21377e-06	0.000735954	149	FOXI2, MGMT, SIX2, AP-2A, MILI, Plectin 1, MIWI, SNIP, Chapsyn-110, DYLX2, BMP8A, PKC-zeta, GCR-alpha, BETA-PIX, TBX5, MSX1, OMgp, HOXA5, SLIT3, Neurofibromin, Troponin T, cardiac, Nucleoredoxin, NDRG1, DLX5, Caspase-1, microRNA 125b-1, CNTN1 (F3), Caspr2, ZAP70, HOXB4, TIP30, BAI1, BLOS1, MEL1, TCF21, PAX8, ASZ1, KIAA1688, CRIPTO-3, G3PT, A2M, KIS, LASS3, GCR-beta, ZNF406, Neurexin 1-alpha, Neur…	0.000318279	0.0493215	100	MGMT, ROR-alpha, DCDC2, ADAM12, MILI, PHL1, NGL-1, DYLX2, L-type Ca(II) channel, alpha 1C subunit, PKC-zeta, Thrombopoietin, Protocadherin 15, UNC45B, Neurofibromin, Troponin T, cardiac, Nucleoredoxin, FLG2, BAI1, Myosin X, PAX8, CRIPTO-3, G3PT, PAFAH alpha (LIS1), KIS, ACSL6, LASS3, ZNF406, GSH2, Neurexin 1-alpha, CACNB2, Filaggrin, DSCAM, ARCGAP22, DMP4, GATA-4, Bystin, VAMP3, ATP8A2, B-chimaer…	0.00253623	0.0634989	71	HLA-DQB1, KIAA1838, QKI, Ski, NOX4, Paralemmin, PTPR-delta, Epimorphin, NANOS2, Tyro3, MICALCL, p90RSK3(RPS6KA2), Rab-17, C17, SLAC2-B, TBX5, ODZ2, CatSper2, Ephexin, Mu-type opioid receptor, NRTN, Nucleoredoxin, KIAA1853, SIAT8D, PLD6, WNT3, Myt1L, CD1d, AKIP1, LDB2, NDRG4, HOXD3, DAB1, LASS3, Neurotrimin, P/Q-type calcium channel alpha-1A subunit, cAMP-GEFII, IAP, Bcl-2, TBX20, DMP4, ANKRD2, MT…	8.62595e-08	3.37644e-05	206	FOXI2, MGMT, DCDC2, SIX2, MILI, NGL-1, Plectin 1, MIWI, Chapsyn-110, L-type Ca(II) channel, alpha 1C subunit, BMP8A, PKC-zeta, BETA-PIX, MSX1, OMgp, SLIT3, Neurofibromin, NDRG1, microRNA 125b-1, CNTN1 (F3), Caspr2, HOXB4, TIP30, BLOS1, ASZ1, G3PT, ACSL6, ZNF406, GSH2, Neurexin 1-alpha, CACNB2, Filaggrin, DSCAM, DMP4, ARCGAP22, GATA-4, Myelin basic protein, CECR2, LR8, LHX3, VAMP3, ATP8A2, PAX3, B…
10	cellular developmental process	3165	4.54906e-07	0.000155805	0.00305523	0.150297	59	HLA-DQB1, Ski, NOX4, Paralemmin, NANOS2, Tyro3, MICALCL, p90RSK3(RPS6KA2), Rab-17, C17, SLAC2-B, TBX5, ODZ2, CatSper2, Mu-type opioid receptor, NRTN, Nucleoredoxin, KIAA1853, SIAT8D, PLD6, WNT3, Myt1L, AKIP1, LDB2, NDRG4, HOXD3, Casein kinase I (alpha-like), LASS3, Neurotrimin, cAMP-GEFII, P/Q-type calcium channel alpha-1A subunit, IAP, Bcl-2, TBX20, DMP4, ANKRD2, MTG16 (CBFA2T3), MSK2, GLI-2, CE…	0.0339112	0.265199	39	KIAA1838, DAB1, QKI, Ski, C19orf51, NOX4, Paralemmin, Neurotrimin, PTPR-delta, P/Q-type calcium channel alpha-1A subunit, Epimorphin, Tyro3, Rab-17, MTG16 (CBFA2T3), GLI-2, ODZ2, CHD2, ITGB3, Ephexin, Astrotactin-1, Cypher, CYP1A1, NRTN, Nucleoredoxin, B-chimaerin, SH3TC2, G-protein alpha-12, KIAA1853, NELL1, SIAT8D, MTGR1, Myt1L, Evi-1, DLL3, CD1d, GABA-A receptor beta-3 subunit, HEPH, LDB2, NDR…	1.16845e-05	0.00160545	151	FOXI2, MGMT, SIX2, AP-2A, MILI, Plectin 1, MIWI, SNIP, Chapsyn-110, DYLX2, BMP8A, PKC-zeta, GCR-alpha, BETA-PIX, TBX5, MSX1, OMgp, HOXA5, SLIT3, Neurofibromin, Troponin T, cardiac, Nucleoredoxin, NDRG1, DLX5, Caspase-1, microRNA 125b-1, CNTN1 (F3), Caspr2, ZAP70, HOXB4, TIP30, BAI1, BLOS1, MEL1, TCF21, PAX8, ASZ1, KIAA1688, CRIPTO-3, G3PT, A2M, KIS, LASS3, GCR-beta, ZNF406, Neurexin 1-alpha, Neur…	0.000842896	0.0777826	101	MGMT, ROR-alpha, DCDC2, ADAM12, MILI, CERT, PHL1, NGL-1, DYLX2, L-type Ca(II) channel, alpha 1C subunit, PKC-zeta, Thrombopoietin, Protocadherin 15, UNC45B, Neurofibromin, Troponin T, cardiac, Nucleoredoxin, FLG2, BAI1, Myosin X, PAX8, CRIPTO-3, G3PT, PAFAH alpha (LIS1), KIS, ACSL6, LASS3, ZNF406, GSH2, Neurexin 1-alpha, CACNB2, Filaggrin, DSCAM, ARCGAP22, DMP4, GATA-4, Bystin, VAMP3, ATP8A2, B-c…	0.00293779	0.0689874	73	HLA-DQB1, KIAA1838, QKI, Ski, C19orf51, NOX4, Paralemmin, PTPR-delta, Epimorphin, NANOS2, Tyro3, MICALCL, p90RSK3(RPS6KA2), Rab-17, C17, SLAC2-B, TBX5, ODZ2, CatSper2, Ephexin, Mu-type opioid receptor, NRTN, Nucleoredoxin, KIAA1853, SIAT8D, PLD6, WNT3, Myt1L, CD1d, AKIP1, LDB2, NDRG4, HOXD3, DAB1, Casein kinase I (alpha-like), LASS3, Neurotrimin, P/Q-type calcium channel alpha-1A subunit, cAMP-GE…	4.54906e-07	0.000155805	209	FOXI2, MGMT, DCDC2, SIX2, MILI, CERT, NGL-1, Plectin 1, MIWI, Chapsyn-110, L-type Ca(II) channel, alpha 1C subunit, BMP8A, PKC-zeta, BETA-PIX, MSX1, OMgp, SLIT3, Neurofibromin, NDRG1, microRNA 125b-1, CNTN1 (F3), Caspr2, HOXB4, TIP30, BLOS1, ASZ1, G3PT, ACSL6, ZNF406, GSH2, Neurexin 1-alpha, CACNB2, Filaggrin, DSCAM, DMP4, ARCGAP22, GATA-4, Myelin basic protein, CECR2, LR8, LHX3, VAMP3, ATP8A2, P…
11	positive regulation of biological process	4118	6.82235e-06	0.00105897	0.00203448	0.134895	74	JKAP, HLA-DQB1, HLA-A2, NOX5, Ski, NOX4, Paralemmin, NF-AT5, HTR4, CARD7, PSMD14, Tenascin-X, p90RSK3(RPS6KA2), HLA-A68, C17, SLAC2-B, TBX5, AHRR, ODZ2, Raptor, KIAA0748, ST5, Tiam2, IFI17, Mu-type opioid receptor, PGRP-S, HLADPA1, Cyclophilin E, PAR1, APOC2, WNT3, Myt1L, ODZ1, RAIDD, HOXA3, CD40(TNFRSF5), PRKAR1B, p22-phox, LDB2, HLA-DQB2, Livin, HLA-A3, NDRG4, HOXD3, DMRT2, cAMP-GEFII, TORC1, B…	0.00483898	0.0868507	53	BAD, NOX5, DAB1, QKI, Collagen XXVI, Ski, NOX4, Paralemmin, PTPR-delta, NF-AT5, MBL2, OMA1, DKKL1, CPT-1A, CARD7, KLHL6, PSMD1, GluR1, MTG16 (CBFA2T3), 1B35_HUMAN, 1B57_HUMAN, GLI-2, AHRR, ODZ2, Raptor, HLA-B7, ACM3, ST5, ITGB3, Tiam2, Ephexin, HLAB, CYP1A1, HLADPA1, PAR1, MLC1, NELL1, 1B08_HUMAN, DPP6, MTGR1, Myt1L, Evi-1, MVD, DLL3, CD1d, LAT, 1B73, PRKAR1B, HLA-B27, HLA-DQB2, LDB2, TRIM5, NDRG4	1.01976e-05	0.00155273	188	MGMT, ERR3, SIX2, AP-2A, MBL2, ZC3HAV1, MILI, Tissue factor, Tenascin-X, PSMB1, SNIP, BMP8A, ERCC6, PKC-zeta, GCR-alpha, BETA-PIX, PRG2, TBX5, MSX1, HOXA5, CR1L, PKR, Neurofibromin, NDRG1, HLADPA1, DLX5, MOG, TAP1 (PSF1), Caspase-1, BPGAP1, microRNA 125b-1, CNTN1 (F3), ZAP70, HOXB4, Thrombospondin 1, TIP30, HCN2, MEL1, PRKAR1B, NCOA2 (GRIP1/TIF2), TCF21, Aurora-C, PAX8, HLA-DQB2, G3PT, Leukocyte …	0.00352461	0.124014	122	MGMT, ROR-alpha, TEF-1, MILI, PHL1, RBP4, RIMS1, PKC-zeta, Helios, ZNF205, Thrombopoietin, RecQL4, CR1L, PKR, Neurofibromin, USF1, IP3R1, TIGAR (C12orf5), Myosin X, PAX8, Livin, G3PT, PAFAH alpha (LIS1), Formin, KIS, ACSL6, Alpha-1D adrenergic receptor, MAPRE3(EB3), GSH2, LRH1, Neurexin 1-alpha, CACNB2, DSCAM, Capsaicin receptor, DMP4, PSMD3, GATA-4, eEF1D, RAMP1, H-cadherin, PF4, EBF3, C3, VAMP3…	2.31768e-05	0.00112739	101	JKAP, BAD, HLA-DQB1, HLA-A2, NOX5, QKI, Collagen XXVI, Ski, NOX4, Paralemmin, PTPR-delta, NF-AT5, MBL2, OMA1, DKKL1, HTR4, CARD7, PSMD14, Tenascin-X, p90RSK3(RPS6KA2), HLA-A68, C17, SLAC2-B, 1B57_HUMAN, TBX5, AHRR, ODZ2, Raptor, HLA-B7, KIAA0748, ST5, Tiam2, Ephexin, IFI17, Mu-type opioid receptor, HLAB, PGRP-S, HLADPA1, Cyclophilin E, PAR1, APOC2, WNT3, Myt1L, RAIDD, ODZ1, MVD, CD1d, HOXA3, LAT,…	6.82235e-06	0.00105897	253	MGMT, SIX2, TEF-1, MBL2, MILI, PSMB1, BMP8A, ERCC6, PKC-zeta, BETA-PIX, Helios, ZNF205, MSX1, RecQL4, Neurofibromin, NDRG1, HLADPA1, MOG, IP3R1, TAP1 (PSF1), microRNA 125b-1, CNTN1 (F3), HOXB4, TIP30, TIGAR (C12orf5), HLA-DQB2, Leukocyte elastase, G3PT, Formin, ACSL6, GSH2, RHG7, Neurexin 1-alpha, CACNB2, CRIM2, DSCAM, DMP4, PSMD3, GATA-4, H-cadherin, LHX3, MLK3(MAP3K11), VAMP3, ATP8A2, STIM1, PA…
12	regulation of multicellular organismal process	2332	2.40274e-05	0.00287322	0.0230931	0.25146	42	NOX5, Ski, Paralemmin, CARD7, Rab-17, TBX5, KIAA0748, IFI17, Mu-type opioid receptor, PGRP-S, Urocortin 2, PAR1, Thyroglobulin, APOC2, WNT3, CD40(TNFRSF5), p22-phox, NDRG4, HOXD3, Carboxypeptidase H, DMRT2, Neurotrimin, cAMP-GEFII, P/Q-type calcium channel alpha-1A subunit, Bcl-2, TBX20, DMP4, MSK2, GLI-2, HTR2A, GnRH1, HTR2B, GATA-6, PAX3, GPR39, RILP (REST-interacting LIM domain protein), IBP3,…	0.0141718	0.184614	32	Carboxypeptidase H, BAD, NOX5, DAB1, Ski, Paralemmin, Neurotrimin, PTPR-delta, OMA1, P/Q-type calcium channel alpha-1A subunit, CARD7, Rab-17, GluR1, 1B35_HUMAN, 1B57_HUMAN, GLI-2, HLA-B7, ACM3, ITGB3, Ephexin, HLAB, RIMS4, PAR1, Thyroglobulin, NELL1, 1B08_HUMAN, MTGR1, DLL3, CD1d, 1B73, HLA-B27, NDRG4	0.000261127	0.012946	111	AP-2A, ZAN, ZC3HAV1, Tissue factor, SNIP, DYLX2, BMP8A, PKC-zeta, GCR-alpha, PRG2, TBX5, MSX1, OMgp, HOXA5, PKR, HCA112, Neurofibromin, Troponin T, cardiac, DLX5, DEC1 (Stra13), Caspase-1, CNTN1 (F3), ZAP70, Thrombospondin 1, Beta TnTF, TIP30, HCN2, BAI1, MEL1, PAX8, Leukocyte elastase, Kallikrein 1, PDE4B, GCR-beta, Neurexin 1-alpha, Neuregulin 1, Capsaicin receptor, DMP4, HA2Z, GATA-4, Myelin b…	0.00162894	0.0986412	77	PHL1, NGL-1, RBP4, RIMS1, ARG2, DYLX2, L-type Ca(II) channel, alpha 1C subunit, PKC-zeta, UNC13C, PKR, Neurofibromin, Troponin T, cardiac, USF1, Beta TnTF, BAI1, PAX8, PAFAH alpha (LIS1), ACSL6, Alpha-1D adrenergic receptor, GSH2, Neurexin 1-alpha, DSCAM, Capsaicin receptor, DMP4, GATA-4, PF4, C3, CCKBR, ATP8A2, BMPR1A, MaxiK alpha subunit, NELL1, p73, TTC3, KCNQ1, DMRT3, SSH1L, ZFPM1 (FOG), CLEC…	0.000335251	0.0118909	61	BAD, NOX5, Ski, Paralemmin, PTPR-delta, OMA1, CARD7, Rab-17, 1B57_HUMAN, TBX5, HLA-B7, KIAA0748, Ephexin, IFI17, Mu-type opioid receptor, HLAB, RIMS4, PGRP-S, Urocortin 2, PAR1, Thyroglobulin, APOC2, WNT3, CD1d, CD40(TNFRSF5), p22-phox, NDRG4, HOXD3, Carboxypeptidase H, DAB1, DMRT2, Neurotrimin, P/Q-type calcium channel alpha-1A subunit, cAMP-GEFII, Bcl-2, TBX20, DMP4, GluR1, MSK2, 1B35_HUMAN, GL…	2.40274e-05	0.00287322	154	NGL-1, L-type Ca(II) channel, alpha 1C subunit, BMP8A, PKC-zeta, MSX1, OMgp, UNC13C, HCA112, Neurofibromin, CNTN1 (F3), Beta TnTF, TIP30, Leukocyte elastase, ACSL6, GSH2, Neurexin 1-alpha, DSCAM, DMP4, HA2Z, GATA-4, Myelin basic protein, CHSY1, LR8, ATP8A2, PAX3, BMPR1A, MaxiK alpha subunit, p73, KCNQ1, DMRT3, CLEC2A, AIM2, HDAC4, Activin beta A, Liprin-alpha3, BMP8B, DLX2, CELSR1, EDNRB, RUFY3, …
13	response to external stimulus	1412	6.36221e-05	0.00608342	0.0122627	0.222815	29	HLA-A2, HTR4, p90RSK3(RPS6KA2), AFAP, HLA-A68, Enkephalin A, ARSB, GCN2, ODZ2, Raptor, Mu-type opioid receptor, NRTN, PGRP-S, SIAT8D, APOC2, WNT3, RAIDD, CD40(TNFRSF5), p22-phox, HLA-A3, P/Q-type calcium channel alpha-1A subunit, Bcl-2, HLA-A11, MSK2, GLI-2, HTR2A, CYP1A1, Evi-1, Urocortin 3	0.0113142	0.153153	22	BAD, P/Q-type calcium channel alpha-1A subunit, AFAP, LRAT, 1B35_HUMAN, 1B57_HUMAN, ARSB, GCN2, GLI-2, ODZ2, Raptor, HLA-B7, ITGB3, HLAB, CYP1A1, NRTN, SIAT8D, 1B08_HUMAN, Evi-1, CD1d, 1B73, HLA-B27	0.001477	0.0388137	70	MGMT, Plectin 1, Tissue factor, LTBR2, ATG4C, SLIT3, PDE6B, PKR, Mucin 4, DLX5, DEC1 (Stra13), Caspase-1, DHSO, CNTN1 (F3), Thrombospondin 1, KIAA1688, A2M, Kallikrein 1, PDE4B, Neurexin 1-alpha, SHRM, GATA-4, CHSY1, PF4, PCSK9, C3, LHX3, Ephrin-A receptor 4, ACAT2, Neutral sphingomyelinase, GLUT1, SOAT2, PDXK, CXCR6, Alpha-N-catenin, MEIS2, HOXA1, COL9A1, Neurexin 1-beta, ABCR, Beta-fodrin, p90R…	0.0078557	0.162745	48	MGMT, RBP4, ARG2, L-type Ca(II) channel, alpha 1C subunit, Protocadherin 15, PDE6B, PKR, USF1, Myosin X, ACSL6, Neurexin 1-alpha, CACNB2, BCDO, GATA-4, PF4, C3, MaxiK alpha subunit, Neurexin 1-beta, ABCR, VTI1B, COL4A1, ARSB, Raptor, BMPR1B, mGluR8, PC1, Alpha-1A adrenergic receptor, PON1, NPAS3, SHANK2, Neuropilin-1, Gpc6, Spectrin beta 4, FGFR1, FOXP1, CHMP1A, HTR2A, PDGF-R-alpha, CACNA1D, Anky…	0.000964977	0.0300503	40	BAD, HLA-A2, HTR4, p90RSK3(RPS6KA2), HLA-A68, AFAP, Enkephalin A, LRAT, 1B57_HUMAN, ARSB, GCN2, ODZ2, Raptor, HLA-B7, Mu-type opioid receptor, HLAB, NRTN, PGRP-S, SIAT8D, APOC2, WNT3, RAIDD, CD1d, CD40(TNFRSF5), p22-phox, HLA-A3, P/Q-type calcium channel alpha-1A subunit, Bcl-2, HLA-A11, MSK2, 1B35_HUMAN, GLI-2, HTR2A, ITGB3, CYP1A1, 1B08_HUMAN, Evi-1, 1B73, Urocortin 3, HLA-B27	6.36221e-05	0.00608342	100	MGMT, Plectin 1, L-type Ca(II) channel, alpha 1C subunit, SLIT3, PDE6B, Mucin 4, CNTN1 (F3), ACSL6, Neurexin 1-alpha, CACNB2, GATA-4, CHSY1, LHX3, GLUT1, MaxiK alpha subunit, SOAT2, HOXA1, p90RSK3(RPS6KA2), VTI1B, COL4A1, SDHL, Raptor, Brca1, EDNRB, ACADM, NPAS3, SHANK2, Gpc6, Spectrin beta 4, CHMP1A, HOXA2, PIKE(CENTG1), PDGF-R-alpha, Ankyrin-B, ISL2, Mindin, PLA2G1B, KCNQ2, FEZ2, DARP, RBP4, Ti…
14	single-organism cellular process	10827	0.00157291	0.049824	0.00201297	0.134895	164	JKAP, SLC7A9, KCNK15, Cadherin 22, HLA-DQB1, HLA-A2, NOX5, Ski, NOX4, Paralemmin, ASB16, SLURP1, NF-AT5, NANOS2, NHE3, PCDHB4, HTR4, CARD7, PSMD14, Tyro3, MICALCL, PDE10A, Tenascin-X, p90RSK3(RPS6KA2), VPS13A, AFAP, HLA-A68, PANX2, Rab-17, Enkephalin A, C17, OR8D4, SLAC2-B, ASCT2 (SLC1A5), ARSB, GCN2, TBX5, AHRR, ODZ2, Raptor, CatSper2, Tiam2, IFI17, Mu-type opioid receptor, NRTN, Nucleoredoxin, …	0.0201471	0.226002	113	Carboxypeptidase H, BAD, GPR133, MLC1F, Cadherin 22, KIAA1838, NOX5, GANP, DAB1, QKI, TBCD, Collagen XXVI, Ski, C19orf51, NOX4, Paralemmin, PCGF1, ASB16, Neurotrimin, PTPR-delta, Fibromodulin, SLURP1, NPR3, NF-AT5, OMA1, DYNC1I1, P/Q-type calcium channel alpha-1A subunit, Epimorphin, DKKL1, CENTG2, NHE3, CPT-1A, Syntaxin 1B, CARD7, Tyro3, KLHL6, NINJ2, PSMD1, AFAP, PANX2, Rab-17, GluR1, MTG16 (CB…	0.007983	0.113246	403	PCDHA8, FOXI2, SCAP2, ARHGAP20, PCDHA4, MGMT, Collagen XXIII, ERR3, SIX2, ATP6V1G1, AP-2A, HEPHL1, SLC25A22, CUTL2, CIDE-B, ZAN, DNAH5, ZC3HAV1, MSH4, MILI, Plectin 1, ITGA10, Septin 8, Tissue factor, Tenascin-X, PSMB1, MIWI, SNIP, Chapsyn-110, LTBR2, DYLX2, InPP5A, BMP8A, ERCC6, SORCS2, PKC-zeta, GCR-alpha, ATG4C, BETA-PIX, SES1, TBX5, FYCO1, MSX1, Galpha(i)-specificTHR&S GPCR (motilin receptor)…	0.00563373	0.147322	282	MGMT, ROR-alpha, DCDC2, ATP5F1, HEPHL1, PERT, ADAM12, TEF-1, MILI, CERT, Gpr156, PHL1, NGL-1, RBP4, LDHC, Septin 8, RIMS1, ARG2, VLCSH1, DYLX2, L-type Ca(II) channel, alpha 1C subunit, SORCS2, PKC-zeta, Cadherin 18 (or 14), type II, Thrombopoietin, FYCO1, RecQL4, UNC13C, Protocadherin 15, Kv4.3 channel, PDE6B, PKR, UNC45B, Neurofibromin, Troponin T, cardiac, Nucleoredoxin, FLG2, USF1, IP3R1, ACOT…	0.00213983	0.0551979	207	JKAP, SLC7A9, BAD, KCNK15, Cadherin 22, HLA-DQB1, KIAA1838, HLA-A2, NOX5, QKI, Collagen XXVI, Ski, C19orf51, NOX4, Paralemmin, ASB16, PTPR-delta, SLURP1, NPR3, NF-AT5, OMA1, Epimorphin, NANOS2, DKKL1, NHE3, PCDHB4, HTR4, CARD7, PSMD14, Tyro3, MICALCL, PDE10A, Tenascin-X, p90RSK3(RPS6KA2), HLA-A68, VPS13A, AFAP, PANX2, Rab-17, Enkephalin A, LRAT, C17, OR8D4, GRIK4, SLAC2-B, 1B57_HUMAN, ASCT2 (SLC1…	0.00157291	0.049824	563	SCAP2, FOXI2, ARHGAP20, MGMT, DCDC2, SIX2, ATP6V1G1, SLC25A22, CUTL2, TEF-1, DNAH5, MILI, Gpr156, CERT, NGL-1, Plectin 1, Septin 8, PSMB1, MIWI, Chapsyn-110, InPP5A, L-type Ca(II) channel, alpha 1C subunit, BMP8A, ERCC6, PKC-zeta, BETA-PIX, SES1, Cadherin 18 (or 14), type II, MSX1, FYCO1, RecQL4, Galpha(i)-specificTHR&S GPCR (motilin receptor), OMgp, NR3B, SLIT3, UNC13C, Kv4.3 channel, PDE6B, Muc…
15	single organism signaling	5050	0.00193225	0.0484147	0.0250733	0.25146	81	JKAP, HLA-DQB1, HLA-A2, Ski, ASB16, NF-AT5, PCDHB4, HTR4, CARD7, PSMD14, Tyro3, PDE10A, p90RSK3(RPS6KA2), AFAP, HLA-A68, PANX2, Rab-17, Enkephalin A, C17, OR8D4, GCN2, TBX5, AHRR, ODZ2, Raptor, Tiam2, IFI17, Mu-type opioid receptor, NRTN, Nucleoredoxin, PGRP-S, HLADPA1, PAR1, Thyroglobulin, APOC2, OR7A5, WNT3, XAF1, ODZ1, RAIDD, Kir1.1, CERK1, CD40(TNFRSF5), PRKAR1B, HLA-DQB2, Livin, SLC6A12, HLA…	0.00221793	0.0484147	64	Carboxypeptidase H, BAD, GPR133, DAB1, QKI, Ski, ASB16, PTPR-delta, Fibromodulin, NPR3, NF-AT5, P/Q-type calcium channel alpha-1A subunit, Epimorphin, DKKL1, CENTG2, Syntaxin 1B, CARD7, Tyro3, KLHL6, PSMD1, AFAP, PANX2, Rab-17, GluR1, LRAT, 1B35_HUMAN, GRIK4, 1B57_HUMAN, GCN2, PRAS40, GLI-2, AHRR, ODZ2, NKp46, Raptor, HLA-B7, CD244, ACM3, ITGB3, Tiam2, Ephexin, HLAB, NRTN, Nucleoredoxin, RIMS4, B…	0.00646524	0.102198	203	SCAP2, ARHGAP20, ERR3, ATP6V1G1, AP-2A, CIDE-B, ITGA10, PSMB1, Chapsyn-110, LTBR2, BMP8A, ERCC6, SORCS2, PKC-zeta, GCR-alpha, BETA-PIX, TBX5, MSX1, Galpha(i)-specificTHR&S GPCR (motilin receptor), OMgp, NR3B, HOXA5, SLIT3, PDE6B, PKR, Neurofibromin, Nucleoredoxin, NPFF receptor 2, NDRG1, LTBR1, HLADPA1, KCNK2, DLX5, OR4A15, ACOT11, Caspase-1, BPGAP1, GPCR135, CNTN1 (F3), Caspr2, ZAP70, HCN2, BAI1…	0.0104965	0.182471	142	ROR-alpha, DCDC2, ADAM12, TEF-1, CERT, Gpr156, PHL1, RBP4, RIMS1, L-type Ca(II) channel, alpha 1C subunit, SORCS2, PKC-zeta, UNC13C, Kv4.3 channel, PDE6B, PKR, Neurofibromin, Nucleoredoxin, IP3R1, ACOT11, DOCK10, BAI1, GRID1, ARHGAP12, Myosin X, Livin, ERG, CRIPTO-3, OAS1, PAFAH alpha (LIS1), Alpha-1D adrenergic receptor, LRH1, Neurexin 1-alpha, CACNB2, Rab-40C, GCPIII, BCDO, Capsaicin receptor, …	0.00193225	0.0506101	109	JKAP, BAD, HLA-DQB1, HLA-A2, QKI, Ski, ASB16, PTPR-delta, NPR3, NF-AT5, Epimorphin, DKKL1, PCDHB4, HTR4, CARD7, PSMD14, Tyro3, PDE10A, p90RSK3(RPS6KA2), HLA-A68, AFAP, PANX2, Rab-17, Enkephalin A, LRAT, C17, OR8D4, GRIK4, 1B57_HUMAN, GCN2, PRAS40, TBX5, AHRR, ODZ2, Raptor, HLA-B7, Tiam2, Ephexin, IFI17, Mu-type opioid receptor, HLAB, NRTN, Nucleoredoxin, RIMS4, PGRP-S, HLADPA1, PAR1, Thyroglobuli…	0.00399605	0.0865547	279	SCAP2, ARHGAP20, DCDC2, ATP6V1G1, TEF-1, Gpr156, CERT, PSMB1, Chapsyn-110, L-type Ca(II) channel, alpha 1C subunit, BMP8A, ERCC6, PKC-zeta, BETA-PIX, MSX1, Galpha(i)-specificTHR&S GPCR (motilin receptor), OMgp, NR3B, SLIT3, UNC13C, Kv4.3 channel, PDE6B, Neurofibromin, NPFF receptor 2, NDRG1, HLADPA1, ACOT11, IP3R1, CNTN1 (F3), Caspr2, BLOS1, GRID1, ASZ1, HLA-DQB2, OAS1, RHG7, Neurexin 1-alpha, CA…
16	signaling	5050	0.00193225	0.0484147	0.0250733	0.25146	81	JKAP, HLA-DQB1, HLA-A2, Ski, ASB16, NF-AT5, PCDHB4, HTR4, CARD7, PSMD14, Tyro3, PDE10A, p90RSK3(RPS6KA2), AFAP, HLA-A68, PANX2, Rab-17, Enkephalin A, C17, OR8D4, GCN2, TBX5, AHRR, ODZ2, Raptor, Tiam2, IFI17, Mu-type opioid receptor, NRTN, Nucleoredoxin, PGRP-S, HLADPA1, PAR1, Thyroglobulin, APOC2, OR7A5, WNT3, XAF1, ODZ1, RAIDD, Kir1.1, CERK1, CD40(TNFRSF5), PRKAR1B, HLA-DQB2, Livin, SLC6A12, HLA…	0.00221793	0.0484147	64	Carboxypeptidase H, BAD, GPR133, DAB1, QKI, Ski, ASB16, PTPR-delta, Fibromodulin, NPR3, NF-AT5, P/Q-type calcium channel alpha-1A subunit, Epimorphin, DKKL1, CENTG2, Syntaxin 1B, CARD7, Tyro3, KLHL6, PSMD1, AFAP, PANX2, Rab-17, GluR1, LRAT, 1B35_HUMAN, GRIK4, 1B57_HUMAN, GCN2, PRAS40, GLI-2, AHRR, ODZ2, NKp46, Raptor, HLA-B7, CD244, ACM3, ITGB3, Tiam2, Ephexin, HLAB, NRTN, Nucleoredoxin, RIMS4, B…	0.00646524	0.102198	203	SCAP2, ARHGAP20, ERR3, ATP6V1G1, AP-2A, CIDE-B, ITGA10, PSMB1, Chapsyn-110, LTBR2, BMP8A, ERCC6, SORCS2, PKC-zeta, GCR-alpha, BETA-PIX, TBX5, MSX1, Galpha(i)-specificTHR&S GPCR (motilin receptor), OMgp, NR3B, HOXA5, SLIT3, PDE6B, PKR, Neurofibromin, Nucleoredoxin, NPFF receptor 2, NDRG1, LTBR1, HLADPA1, KCNK2, DLX5, OR4A15, ACOT11, Caspase-1, BPGAP1, GPCR135, CNTN1 (F3), Caspr2, ZAP70, HCN2, BAI1…	0.0104965	0.182471	142	ROR-alpha, DCDC2, ADAM12, TEF-1, CERT, Gpr156, PHL1, RBP4, RIMS1, L-type Ca(II) channel, alpha 1C subunit, SORCS2, PKC-zeta, UNC13C, Kv4.3 channel, PDE6B, PKR, Neurofibromin, Nucleoredoxin, IP3R1, ACOT11, DOCK10, BAI1, GRID1, ARHGAP12, Myosin X, Livin, ERG, CRIPTO-3, OAS1, PAFAH alpha (LIS1), Alpha-1D adrenergic receptor, LRH1, Neurexin 1-alpha, CACNB2, Rab-40C, GCPIII, BCDO, Capsaicin receptor, …	0.00193225	0.0506101	109	JKAP, BAD, HLA-DQB1, HLA-A2, QKI, Ski, ASB16, PTPR-delta, NPR3, NF-AT5, Epimorphin, DKKL1, PCDHB4, HTR4, CARD7, PSMD14, Tyro3, PDE10A, p90RSK3(RPS6KA2), HLA-A68, AFAP, PANX2, Rab-17, Enkephalin A, LRAT, C17, OR8D4, GRIK4, 1B57_HUMAN, GCN2, PRAS40, TBX5, AHRR, ODZ2, Raptor, HLA-B7, Tiam2, Ephexin, IFI17, Mu-type opioid receptor, HLAB, NRTN, Nucleoredoxin, RIMS4, PGRP-S, HLADPA1, PAR1, Thyroglobuli…	0.00399605	0.0865547	279	SCAP2, ARHGAP20, DCDC2, ATP6V1G1, TEF-1, Gpr156, CERT, PSMB1, Chapsyn-110, L-type Ca(II) channel, alpha 1C subunit, BMP8A, ERCC6, PKC-zeta, BETA-PIX, MSX1, Galpha(i)-specificTHR&S GPCR (motilin receptor), OMgp, NR3B, SLIT3, UNC13C, Kv4.3 channel, PDE6B, Neurofibromin, NPFF receptor 2, NDRG1, HLADPA1, ACOT11, IP3R1, CNTN1 (F3), Caspr2, BLOS1, GRID1, ASZ1, HLA-DQB2, OAS1, RHG7, Neurexin 1-alpha, CA…
17	positive regulation of ERK1 and ERK2 cascade	114	0.00335981	0.0742867	0.00415536	0.176026	6	NOX4, ST5, Mu-type opioid receptor, PAR1, HTR2A, HTR2B	0.0217868	0.235507	4	NOX4, ST5, ITGB3, PAR1	0.00630705	0.100664	10	PKC-zeta, BPGAP1, C3, VEGFR-3, M-CSF receptor, PRR5-ARHGAP8, EDNRA, PDGF-R-alpha, RANK(TNFRSF11A), FGFR2	0.00595943	0.149354	8	PKC-zeta, C3, M-CSF receptor, PRR5-ARHGAP8, Alpha-1A adrenergic receptor, HTR2A, PDGF-R-alpha, PDGF-R-beta	0.00335981	0.0742867	7	NOX4, ST5, Mu-type opioid receptor, PAR1, HTR2A, ITGB3, HTR2B	0.00345349	0.0786176	13	PKC-zeta, PRR5-ARHGAP8, PDGF-R-alpha, FGFR2, BPGAP1, C3, VEGFR-3, M-CSF receptor, Alpha-1A adrenergic receptor, EDNRA, HTR2A, RANK(TNFRSF11A), PDGF-R-beta

## Sheet: table9_GO_molecularfunction
Genes_mapping _to_best_explained_by_GxE_CpG-SNP_Pairs_GOMF
Enrichment analysis report
Enrichment by GO Molecular Functions					M1CpG_gene_genelist				M1SNP_gene_genelist				M4CpG_gene_genelist				M4SNP_gene_genelist				M1all_gene_genelist				M4all_gene(1)_genelist
#	Molecular functions	Total	min(pValue)	Min FDR	p-value	FDR	In Data	Network Objects from Active Data	p-value	FDR	In Data	Network Objects from Active Data	p-value	FDR	In Data	Network Objects from Active Data	p-value	FDR	In Data	Network Objects from Active Data	p-value	FDR	In Data	Network Objects from Active Data	p-value	FDR	In Data	Network Objects from Active Data
1	protein binding	9298	6.21971e-05	0.00839661	0.00034116	0.0472204	150	JKAP, HLA-A2, NOX5, Ski, NOX4, Paralemmin, ASB16, SLURP1, NF-AT5, PHOGRIN, NANOS2, NHE3, SNAP47, CARD7, PSMD14, Tyro3, MICALCL, Tenascin-X, p90RSK3(RPS6KA2), VPS13A, AFAP, HLA-A68, PANX2, Rab-17, Enkephalin A, C17, SLAC2-B, GCN2, HLA-A2 (ICD), TBX5, AHRR, ODZ2, Raptor, CatSper2, KLHL7, Tiam2, IFI17, NeuN, Cyclin L1, Mu-type opioid receptor, NRTN, Nucleoredoxin, BBAP, Ranbp 17, PGRP-S, APBA2BP, Ur…	0.0382478	0.204484	97	Carboxypeptidase H, BAD, NOX5, DAB1, QKI, TBCD, Collagen XXVI, Ski, NOX4, Paralemmin, PCGF1, ASB16, Neurotrimin, PTPR-delta, SLURP1, SLAP, NPR3, NF-AT5, MBL2, DYNC1I1, PHOGRIN, P/Q-type calcium channel alpha-1A subunit, Epimorphin, DKKL1, NHE3, CPT-1A, Syntaxin 1B, CARD7, Tyro3, HADHB, AFAP, PANX2, Rab-17, GluR1, MTG16 (CBFA2T3), TRIM29, 1B35_HUMAN, SLA/LP, GRIK4, 1B57_HUMAN, GCN2, PRAS40, GLI-2,…	0.0871428	0.35108	342	FOXI2, SCAP2, ARHGAP20, Myosin ID, PCDHA4, Collagen XXIII, ERR3, SIX2, ATP6V1G1, AP-2A, CIDE-B, MBL2, ZC3HAV1, MSH4, MILI, CCBL2, Plectin 1, ITGA10, Septin 8, Tissue factor, Tenascin-X, PSMB1, MIWI, SNIP, Chapsyn-110, DYLX2, InPP5A, ZFP100, BMP8A, ERCC6, PKC-zeta, GCR-alpha, BETA-PIX, TBX5, FYCO1, MSX1, OMgp, HOXA5, SLIT3, NOVA2, C1orf35, Myomesin 2, PKR, Mucin 4, HCA112, Neurofibromin, Troponin …	0.0788891	0.30549	244	ROR-alpha, ATP5F1, ADAM12, TEF-1, LRFN2, MILI, CERT, NGL-1, RBP4, Septin 8, RIMS1, ARG2, DYLX2, L-type Ca(II) channel, alpha 1C subunit, PKC-zeta, Helios, ZNF205, Thrombopoietin, FYCO1, Protocadherin 15, Kv4.3 channel, Myomesin 2, MYO1H, PKR, UNC45B, Neurofibromin, Troponin T, cardiac, Nucleoredoxin, ASM3A, TAGLN2, USF1, IP3R1, Catenin alpha-3, STAG1, DOCK10, Beta TnTF, PRMT3, BAI1, GRID1, Myosin…	6.21971e-05	0.00839661	192	JKAP, BAD, HLA-A2, NOX5, QKI, Collagen XXVI, Ski, NOX4, Paralemmin, ASB16, PTPR-delta, SLURP1, NPR3, NF-AT5, MBL2, PHOGRIN, Epimorphin, NANOS2, DKKL1, NHE3, SNAP47, CARD7, PSMD14, Tyro3, MICALCL, Tenascin-X, p90RSK3(RPS6KA2), HLA-A68, VPS13A, AFAP, PANX2, Rab-17, Enkephalin A, TRIM29, C17, GRIK4, SLAC2-B, 1B57_HUMAN, GCN2, HLA-A2 (ICD), PRAS40, TBX5, AHRR, ODZ2, Raptor, HLA-B7, CatSper2, KLHL7, T…	0.0951241	0.360479	476	SCAP2, FOXI2, ARHGAP20, SIX2, ATP6V1G1, TEF-1, MBL2, MILI, CERT, NGL-1, Plectin 1, Septin 8, PSMB1, MIWI, Chapsyn-110, InPP5A, L-type Ca(II) channel, alpha 1C subunit, BMP8A, ERCC6, PKC-zeta, BETA-PIX, Helios, ZNF205, MSX1, FYCO1, OMgp, SLIT3, NOVA2, Kv4.3 channel, Myomesin 2, Mucin 4, HCA112, Neurofibromin, NPFF receptor 2, SPRED3, NDRG1, TRN2, ASM3A, TAGLN2, IP3R1, TAP1 (PSF1), CNTN1 (F3), Cate…
2	GTPase regulator activity	462	0.000217771	0.0258837	0.171362	0.381205	9	ST5, Tiam2, TBCD, cAMP-GEFII, CENTG2, TUSC4, HTR2B, B-chimaerin, TBC1D17	0.0647793	0.23637	8	TBCD, CENTG2, NPRL3, ACM3, ST5, Tiam2, Ephexin, B-chimaerin	0.00182943	0.0635255	29	ARHGAP20, BETA-PIX, DENND1C, Neurofibromin, BPGAP1, ARHGAP12, TBCD, MAPRE3(EB3), HMHA1, RHG7, RASAL3, LyGDI, IQSEC1, ARCGAP22, RGL3, Centaurin alpha 1, RGS14, CDEP, PRR5, RGS16, OBSCN, RASA3, STARD13, PSD3, PIKE(CENTG1), ARHGEF10, ABR, p190RhoGAP, CENTB5	0.000217771	0.0258837	25	RIMS1, Neurofibromin, DOCK10, ARHGAP12, TBCD, MAPRE3(EB3), IQSEC1, ARCGAP22, RGL3, B-chimaerin, Centaurin alpha 1, RGS14, MTMR13, CDEP, Tiam2, RGS16, OBSCN, RASA3, STARD13, PSD3, ARHGEF10, ACM3, ABR, CENTB5, DOCK4	0.104395	0.303735	12	NPRL3, ST5, Tiam2, Ephexin, TBCD, cAMP-GEFII, CENTG2, TUSC4, ACM3, HTR2B, B-chimaerin, TBC1D17	0.0044304	0.156571	36	ARHGAP20, BETA-PIX, DENND1C, Neurofibromin, RHG7, LyGDI, ARCGAP22, RGL3, Centaurin alpha 1, MTMR13, OBSCN, PSD3, PIKE(CENTG1), ABR, RIMS1, BPGAP1, DOCK10, ARHGAP12, TBCD, MAPRE3(EB3), HMHA1, RASAL3, IQSEC1, B-chimaerin, RGS14, CDEP, Tiam2, PRR5, RGS16, RASA3, STARD13, ARHGEF10, ACM3, p190RhoGAP, CENTB5, DOCK4
3	nucleoside-triphosphatase regulator activity	477	0.000352178	0.0304883	0.194414	0.398557	9	ST5, Tiam2, TBCD, cAMP-GEFII, CENTG2, TUSC4, HTR2B, B-chimaerin, TBC1D17	0.0748982	0.249385	8	TBCD, CENTG2, NPRL3, ACM3, ST5, Tiam2, Ephexin, B-chimaerin	0.00149238	0.0556602	30	ARHGAP20, BETA-PIX, DENND1C, Neurofibromin, BPGAP1, ARHGAP12, TBCD, MAPRE3(EB3), HMHA1, RHG7, RASAL3, LyGDI, IQSEC1, ARCGAP22, RGL3, DNAJB6 (Hdj-1), Centaurin alpha 1, RGS14, CDEP, PRR5, RGS16, OBSCN, RASA3, STARD13, PSD3, PIKE(CENTG1), ARHGEF10, ABR, p190RhoGAP, CENTB5	0.000352178	0.0304883	25	RIMS1, Neurofibromin, DOCK10, ARHGAP12, TBCD, MAPRE3(EB3), IQSEC1, ARCGAP22, RGL3, B-chimaerin, Centaurin alpha 1, RGS14, MTMR13, CDEP, Tiam2, RGS16, OBSCN, RASA3, STARD13, PSD3, ARHGEF10, ACM3, ABR, CENTB5, DOCK4	0.123576	0.3246	12	NPRL3, ST5, Tiam2, Ephexin, TBCD, cAMP-GEFII, CENTG2, TUSC4, ACM3, HTR2B, B-chimaerin, TBC1D17	0.00425095	0.156571	37	ARHGAP20, BETA-PIX, DENND1C, Neurofibromin, RHG7, LyGDI, ARCGAP22, RGL3, DNAJB6 (Hdj-1), Centaurin alpha 1, MTMR13, OBSCN, PSD3, PIKE(CENTG1), ABR, RIMS1, BPGAP1, DOCK10, ARHGAP12, TBCD, MAPRE3(EB3), HMHA1, RASAL3, IQSEC1, B-chimaerin, RGS14, CDEP, Tiam2, PRR5, RGS16, RASA3, STARD13, ARHGEF10, ACM3, p190RhoGAP, CENTB5, DOCK4
4	small GTPase regulator activity	320	0.000399592	0.0304883	0.141253	0.339068	7	ST5, Tiam2, cAMP-GEFII, CENTG2, HTR2B, B-chimaerin, TBC1D17	0.174507	0.377441	5	CENTG2, ST5, Tiam2, Ephexin, B-chimaerin	0.00450012	0.116535	21	BETA-PIX, DENND1C, Neurofibromin, BPGAP1, MAPRE3(EB3), RHG7, RASAL3, LyGDI, IQSEC1, RGL3, Centaurin alpha 1, RGS14, CDEP, OBSCN, RASA3, PSD3, PIKE(CENTG1), ARHGEF10, ABR, p190RhoGAP, CENTB5	0.000399592	0.0304883	19	RIMS1, Neurofibromin, DOCK10, MAPRE3(EB3), IQSEC1, RGL3, B-chimaerin, Centaurin alpha 1, RGS14, MTMR13, CDEP, Tiam2, OBSCN, RASA3, PSD3, ARHGEF10, ABR, CENTB5, DOCK4	0.189102	0.396335	8	ST5, Tiam2, Ephexin, cAMP-GEFII, CENTG2, HTR2B, B-chimaerin, TBC1D17	0.00457214	0.156571	27	BETA-PIX, DENND1C, Neurofibromin, RHG7, LyGDI, RGL3, Centaurin alpha 1, MTMR13, OBSCN, PSD3, PIKE(CENTG1), ABR, RIMS1, BPGAP1, DOCK10, MAPRE3(EB3), RASAL3, IQSEC1, B-chimaerin, RGS14, CDEP, Tiam2, RASA3, ARHGEF10, p190RhoGAP, CENTB5, DOCK4
5	cell adhesion molecule binding	76	0.000684131	0.025155	0.272438	0.486083	2	ODZ2, Carboxypeptidase H	0.000684131	0.025155	5	Carboxypeptidase H, PTPR-delta, ODZ2, ITGB3, CD1d	0.127528	0.370818	5	NDRG1, Neurexin 1-alpha, Alpha-N-catenin, Neurexin 1-beta, Alpha-1 catenin	0.0397584	0.261872	5	Catenin alpha-3, Neurexin 1-alpha, H-cadherin, Neurexin 1-beta, FGFR1	0.0100366	0.114826	5	PTPR-delta, ODZ2, CD1d, Carboxypeptidase H, ITGB3	0.0328882	0.267673	8	NDRG1, Catenin alpha-3, Neurexin 1-alpha, H-cadherin, Alpha-N-catenin, Neurexin 1-beta, Alpha-1 catenin, FGFR1
6	GTPase activator activity	260	0.000865454	0.0493408	0.0622018	0.244777	7	Tiam2, TBCD, CENTG2, TUSC4, HTR2B, B-chimaerin, TBC1D17	0.0933262	0.272012	5	TBCD, CENTG2, NPRL3, Tiam2, B-chimaerin	0.000865454	0.0493408	20	ARHGAP20, Neurofibromin, BPGAP1, ARHGAP12, TBCD, HMHA1, RHG7, RASAL3, LyGDI, ARCGAP22, Centaurin alpha 1, RGS14, PRR5, RGS16, RASA3, STARD13, PIKE(CENTG1), ABR, p190RhoGAP, CENTB5	0.00537771	0.0860433	14	Neurofibromin, ARHGAP12, TBCD, ARCGAP22, B-chimaerin, Centaurin alpha 1, RGS14, Tiam2, RGS16, RASA3, STARD13, ABR, CENTB5, DOCK4	0.0816995	0.264637	8	NPRL3, Tiam2, TBCD, CENTG2, TUSC4, HTR2B, B-chimaerin, TBC1D17	0.00483323	0.160739	23	ARHGAP20, Neurofibromin, RHG7, LyGDI, ARCGAP22, Centaurin alpha 1, PIKE(CENTG1), ABR, BPGAP1, ARHGAP12, TBCD, HMHA1, RASAL3, B-chimaerin, RGS14, Tiam2, PRR5, RGS16, RASA3, STARD13, p190RhoGAP, CENTB5, DOCK4
7	binding	13233	0.00153142	0.0424173	0.0673704	0.250294	187	JKAP, SLC7A9, Cadherin 22, HLA-A2, NOX5, Ski, NOX4, Paralemmin, ASB16, SLURP1, NF-AT5, PHOGRIN, NANOS2, NHE3, PFKP, PCDHB4, SNAP47, CARD7, PSMD14, Tyro3, MICALCL, PDE10A, Tenascin-X, p90RSK3(RPS6KA2), VPS13A, AFAP, HLA-A68, PANX2, Rab-17, Enkephalin A, C17, SLAC2-B, ASCT2 (SLC1A5), ARSB, GCN2, HLA-A2 (ICD), TBX5, AHRR, ODZ2, Raptor, CatSper2, KLHL7, Tiam2, IFI17, NeuN, Cyclin L1, Mu-type opioid r…	0.00153142	0.0430599	136	Carboxypeptidase H, BAD, MLC1F, Cadherin 22, NOX5, GANP, DAB1, QKI, TBCD, Collagen XXVI, Ski, NOX4, Paralemmin, SFRS8, PCGF1, CLYBL, ASB16, Neurotrimin, PTPR-delta, SLURP1, SLAP, NPR3, NF-AT5, MBL2, ZNF25, OMA1, DYNC1I1, PHOGRIN, P/Q-type calcium channel alpha-1A subunit, Epimorphin, ZFYVE19, DKKL1, CENTG2, NHE3, CPT-1A, PFKP, Syntaxin 1B, CARD7, Tyro3, NAD synthetase 1, HADHB, ZNF397, AFAP, PANX…	0.00755225	0.118889	486	PCDHA8, FOXI2, SCAP2, ARHGAP20, Myosin ID, TDH, PCDHA4, MGMT, Collagen XXIII, ERR3, SIX2, ATP6V1G1, AP-2A, HEPHL1, CUTL2, CIDE-B, ZAN, DNAH5, LMTK3, MBL2, ZC3HAV1, MSH4, MILI, ZNF121, CCBL2, Plectin 1, ITGA10, Septin 8, Tissue factor, HOXC5, Tenascin-X, PSMB1, Dppa5, MIWI, SNIP, Chapsyn-110, DYLX2, InPP5A, ZFP100, BMP8A, ERCC6, PKC-zeta, GCR-alpha, BETA-PIX, PRG2, TBX5, FYCO1, MSX1, OMgp, NR3B, H…	0.00200977	0.0612281	349	MGMT, ROR-alpha, ATP5F1, HEPHL1, PERT, ADAM12, TEF-1, LRFN2, MILI, PLA2G4E, CERT, NGL-1, RBP4, Septin 8, RIMS1, ARG2, VLCSH1, ZNF682, DYLX2, L-type Ca(II) channel, alpha 1C subunit, PKC-zeta, Basonuclin-2, Cadherin 18 (or 14), type II, Helios, ZNF205, Thrombopoietin, FYCO1, RecQL4, RALYL, UNC13C, Protocadherin 15, GFPT2, Kv4.3 channel, PDE6B, Myomesin 2, ZNF555, MYO1H, PKR, FUCO, UNC45B, Neurofib…	0.00167244	0.0424173	247	JKAP, SLC7A9, BAD, Cadherin 22, HLA-A2, NOX5, QKI, Collagen XXVI, Ski, NOX4, Paralemmin, SFRS8, ASB16, PTPR-delta, SLURP1, NPR3, NF-AT5, MBL2, OMA1, PHOGRIN, Epimorphin, NANOS2, DKKL1, NHE3, PFKP, PCDHB4, SNAP47, CARD7, PSMD14, Tyro3, MICALCL, PDE10A, Tenascin-X, p90RSK3(RPS6KA2), HLA-A68, VPS13A, AFAP, PANX2, Rab-17, Enkephalin A, LRAT, TRIM29, C17, GRIK4, SLAC2-B, 1B57_HUMAN, ASCT2 (SLC1A5), AR…	0.00219446	0.104282	682	SCAP2, FOXI2, ARHGAP20, TDH, MGMT, SIX2, ATP6V1G1, CUTL2, TEF-1, DNAH5, LMTK3, MBL2, MILI, CERT, NGL-1, Plectin 1, Septin 8, HOXC5, PSMB1, MIWI, Chapsyn-110, InPP5A, L-type Ca(II) channel, alpha 1C subunit, BMP8A, ERCC6, PKC-zeta, BETA-PIX, Cadherin 18 (or 14), type II, Helios, ZNF205, MSX1, FYCO1, RecQL4, OMgp, NR3B, RALYL, SLIT3, UNC13C, NOVA2, Kv4.3 channel, PDE6B, UXS1, Myomesin 2, ZNF555, Mu…
8	calcium-dependent protein binding	54	0.00264908	0.0889207	0.164151	0.372032	2	S100B, S100P	0.0887752	0.261942	2	MBL2, Epimorphin	0.00264908	0.0889207	7	Myosin ID, MBL2, Beta TnTF, Neurexin 1-alpha, S100B, S100P, Neurexin 1-beta	0.148458	0.36761	3	Beta TnTF, Neurexin 1-alpha, Neurexin 1-beta	0.0139226	0.132266	4	MBL2, Epimorphin, S100B, S100P	0.0160938	0.199052	7	MBL2, Beta TnTF, Neurexin 1-alpha, S100P, Myosin ID, S100B, Neurexin 1-beta
9	phosphoric ester hydrolase activity	372	0.00530699	0.0860433	0.0293343	0.185153	10	JKAP, PHOGRIN, PDE10A, PLD6, FLJ32658, IAP, HTR2A, PLC-beta3, HTR2B, PLAP-like	0.450546	0.644794	4	PTPR-delta, PHOGRIN, ACM3, PTPR-sigma	0.104769	0.358336	18	InPP5A, PDE6B, ASM3A, PTG, Ublcp1, PDE4B, CCKBR, Neutral sphingomyelinase, JKAP, SYNJ2, PHOGRIN, EYA4, PIP5KIII, PON1, EDNRA, PPP1R3B, PPM1L, SHIP	0.00530699	0.0860433	18	PHL1, PDE6B, ASM3A, TIGAR (C12orf5), PLCXD2, CCKBR, SSH1L, SYNJ2, PHOGRIN, MTMR13, PTPRV (ESP), PTPR-gamma, PON1, PPM1L, HTR2A, ACM3, SHIP, PLCL2	0.0127333	0.130227	13	JKAP, PTPR-delta, PHOGRIN, PDE10A, PLD6, FLJ32658, IAP, HTR2A, ACM3, PLC-beta3, HTR2B, PTPR-sigma, PLAP-like	0.0171126	0.202591	28	InPP5A, PDE6B, ASM3A, TIGAR (C12orf5), SYNJ2, MTMR13, EYA4, PTPRV (ESP), PTPR-gamma, PPP1R3B, SHIP, PHL1, PTG, Ublcp1, PDE4B, PLCXD2, CCKBR, Neutral sphingomyelinase, JKAP, SSH1L, PHOGRIN, PIP5KIII, PON1, EDNRA, PPM1L, HTR2A, ACM3, PLCL2
10	calcium ion binding	755	0.013557	0.117029	0.013557	0.117029	18	Cadherin 22, NOX5, PCDHB4, APBA2BP, PCDH21, LRP1B, LRP1B (ICD), UMODL1, MLC1F, FLJ32658, DMP4, PLC-beta3, Ryanodine receptor 1, CEP-68, CALP, LRP1B (CTF), S100B, S100P	0.39653	0.597905	8	MLC1F, Cadherin 22, NOX5, MBL2, NELL1, PCDH21, UMODL1, CALP	0.112155	0.370818	33	PCDHA8, PCDHA4, MGMT, MBL2, SLIT3, PCDHA1, PCDHA2, Thrombospondin 1, UMODL1, Neurexin 1-alpha, DMP4, PCDHB8, PCDHA3, PCDA7, Alpha-actinin 2, S100B, S100P, PCDHGB4, Neurexin 1-beta, PCDHA6, LTBP4, PLSCR4, SLIT1, CaMKK2, MLC1F, PON1, CDH20, PCDHA5(CNR6), PLA2G1B, PCDHB7, Pcdha9, CEP-68, PCDHB11	0.0551612	0.279842	26	MGMT, PERT, Cadherin 18 (or 14), type II, Protocadherin 15, FLG2, UMODL1, Neurexin 1-alpha, Filaggrin, PCDHAC1, DMP4, H-cadherin, STIM1, NELL1, PCDA7, PCDHGB4, PCDHAC2, Neurexin 1-beta, CELSR1, PON1, CDH20, NELL2, PLCL2, PLA2G1B, CALML6, CALP, AP1GBP1	0.0379456	0.218917	20	Cadherin 22, NOX5, MBL2, PCDHB4, APBA2BP, PCDH21, LRP1B, LRP1B (ICD), UMODL1, MLC1F, FLJ32658, DMP4, PLC-beta3, NELL1, Ryanodine receptor 1, CEP-68, CALP, LRP1B (CTF), S100B, S100P	0.0289111	0.254943	49	MGMT, MBL2, Cadherin 18 (or 14), type II, SLIT3, UMODL1, Neurexin 1-alpha, Filaggrin, PCDHAC1, DMP4, H-cadherin, PCDHA3, STIM1, PCDA7, Alpha-actinin 2, S100P, PCDHA6, LTBP4, PLSCR4, CELSR1, NELL2, PCDHA5(CNR6), PLA2G1B, PCDHB7, Pcdha9, PCDHB11, PCDHA8, PCDHA4, PERT, Protocadherin 15, PCDHA1, FLG2, PCDHA2, Thrombospondin 1, PCDHB8, NELL1, S100B, PCDHGB4, PCDHAC2, Neurexin 1-beta, SLIT1, CaMKK2, ML…
11	TFIIIC-class transcription factor binding	2	0.0183773	0.155454	0.0267181	0.174261	1	Raptor	0.0183773	0.155454	1	Raptor	0.0688325	0.328504	1	Raptor	0.0487863	0.261872	1	Raptor	0.0341824	0.202396	1	Raptor	0.0960039	0.360479	1	Raptor
12	protein-disulfide reductase activity	2	0.0183773	0.155454	0.0267181	0.174261	1	Nucleoredoxin	0.0183773	0.155454	1	Nucleoredoxin	0.0688325	0.328504	1	Nucleoredoxin	0.0487863	0.261872	1	Nucleoredoxin	0.0341824	0.202396	1	Nucleoredoxin	0.0960039	0.360479	1	Nucleoredoxin

## Sheet: table10_GO_processes
Genes_mapping _to_best_explained_by_GxE_CpG-SNP_Pairs_GOProcesses
Enrichment analysis report
Enrichment by GO Processes					M1CpG_gene_genelist				M1SNP_gene_genelist				M4CpG_gene_genelist				M4SNP_gene_genelist				M1all_gene_genelist				M4all_gene(1)_genelist
#	Processes	Total	min(pValue)	Min FDR	p-value	FDR	In Data	Network Objects from Active Data	p-value	FDR	In Data	Network Objects from Active Data	p-value	FDR	In Data	Network Objects from Active Data	p-value	FDR	In Data	Network Objects from Active Data	p-value	FDR	In Data	Network Objects from Active Data	p-value	FDR	In Data	Network Objects from Active Data
1	system development	3988	5.43746e-13	2.97973e-09	0.00523407	0.190047	70	Cadherin 22, HLA-DQB1, NOX5, Ski, NOX4, Paralemmin, PCDHB4, Tyro3, p90RSK3(RPS6KA2), VPS13A, Rab-17, C17, SLAC2-B, ARSB, TBX5, ODZ2, Mu-type opioid receptor, NRTN, Nucleoredoxin, KIAA1853, Thyroglobulin, SIAT8D, WNT3, Myt1L, ODZ1, Kir1.1, HOXA3, PRKAR1B, LDB2, NDRG4, HOXD3, Carboxypeptidase H, MLC1F, SETDB1, LASS3, DMRT2, Neurotrimin, Fibromodulin, ENC1, cAMP-GEFII, P/Q-type calcium channel alpha…	0.000109302	0.00369802	58	Carboxypeptidase H, MLC1F, Cadherin 22, NOX5, DAB1, QKI, Ski, NOX4, Paralemmin, Neurotrimin, PTPR-delta, Fibromodulin, NPR3, P/Q-type calcium channel alpha-1A subunit, Epimorphin, NPRL3, Tyro3, NINJ2, Rab-17, GluR1, MTG16 (CBFA2T3), 1B35_HUMAN, 1B57_HUMAN, ARSB, GLI-2, ODZ2, HLA-B7, ACM3, CHD2, ITGB3, Ephexin, Astrotactin-1, Selenoprotein P, HLAB, CYP1A1, NRTN, Nucleoredoxin, PTPR-sigma, SH3TC2, …	4.94431e-10	7.92573e-07	203	PCDHA8, FOXI2, PCDHA4, MGMT, SIX2, AP-2A, MSH4, HOXC5, SNIP, Chapsyn-110, DYLX2, BMP8A, PKC-zeta, GCR-alpha, BETA-PIX, TBX5, MSX1, OMgp, HOXA5, SLIT3, PCDHA1, PDE6B, Mucin 4, Neurofibromin, Troponin T, cardiac, Nucleoredoxin, NDRG1, DLX5, MOG, PCDHA2, DEC1 (Stra13), Caspase-1, microRNA 125b-1, CNTN1 (F3), Caspr2, ZAP70, HOXB4, Thrombospondin 1, TIP30, HCN2, BAI1, BLOS1, MEL1, PRKAR1B, NCOA2 (GRIP…	2.2259e-05	0.0232829	131	CLMP, MGMT, ROR-alpha, DCDC2, PERT, TEF-1, CERT, PHL1, NGL-1, RBP4, ARG2, DYLX2, L-type Ca(II) channel, alpha 1C subunit, PKC-zeta, Basonuclin-2, Thrombopoietin, RecQL4, Protocadherin 15, PDE6B, UNC45B, Neurofibromin, Troponin T, cardiac, Nucleoredoxin, FLG2, TAGLN2, BAI1, Myosin X, PAX8, Maspin, SLC38A10, PAFAH alpha (LIS1), Formin, KIS, ACSL6, LASS3, ZNF406, GSH2, CRISPLD2, LRH1, Neurexin 1-alp…	8.99371e-05	0.0038764	96	Cadherin 22, HLA-DQB1, NOX5, QKI, Ski, NOX4, Paralemmin, PTPR-delta, NPR3, Epimorphin, PCDHB4, NPRL3, Tyro3, p90RSK3(RPS6KA2), VPS13A, Rab-17, C17, SLAC2-B, 1B57_HUMAN, ARSB, TBX5, ODZ2, HLA-B7, Ephexin, Selenoprotein P, Mu-type opioid receptor, HLAB, NRTN, Nucleoredoxin, KIAA1853, Thyroglobulin, SIAT8D, WNT3, Myt1L, ODZ1, Kir1.1, CD1d, HOXA3, PRKAR1B, LDB2, NDRG4, HOXD3, Carboxypeptidase H, MLC1…	5.43746e-13	2.97973e-09	281	FOXI2, CLMP, MGMT, DCDC2, SIX2, TEF-1, CERT, NGL-1, HOXC5, Chapsyn-110, L-type Ca(II) channel, alpha 1C subunit, BMP8A, PKC-zeta, BETA-PIX, MSX1, RecQL4, OMgp, SLIT3, PDE6B, Mucin 4, Neurofibromin, NDRG1, TAGLN2, MOG, microRNA 125b-1, CNTN1 (F3), Caspr2, HOXB4, TIP30, BLOS1, Maspin, Formin, ACSL6, ZNF406, HOXD12, GSH2, RHG7, Neurexin 1-alpha, CACNB2, Filaggrin, DSCAM, PCDHAC1, DMP4, ARCGAP22, GAT…
2	multicellular organismal development	4648	1.3349e-12	3.65762e-09	0.00276843	0.146445	81	JKAP, Cadherin 22, HLA-DQB1, NOX5, Ski, NOX4, Paralemmin, NANOS2, PCDHB4, Tyro3, MICALCL, p90RSK3(RPS6KA2), VPS13A, Rab-17, C17, SLAC2-B, ARSB, TBX5, ODZ2, CatSper2, IFI17, Mu-type opioid receptor, NRTN, Nucleoredoxin, KIAA1853, Thyroglobulin, SIAT8D, PLD6, WNT3, Myt1L, ODZ1, Kir1.1, HOXA3, PRKAR1B, LDB2, NDRG4, HOXD3, Carboxypeptidase H, MLC1F, SETDB1, LASS3, DMRT2, Neurotrimin, Fibromodulin, EN…	0.00123474	0.0305283	61	Carboxypeptidase H, MLC1F, Cadherin 22, NOX5, DAB1, QKI, Ski, NOX4, Paralemmin, Neurotrimin, PTPR-delta, Fibromodulin, NPR3, P/Q-type calcium channel alpha-1A subunit, Epimorphin, NPRL3, Tyro3, NINJ2, Rab-17, GluR1, MTG16 (CBFA2T3), LRAT, 1B35_HUMAN, 1B57_HUMAN, ARSB, GLI-2, ODZ2, HLA-B7, ACM3, CHD2, ITGB3, Ephexin, Astrotactin-1, Selenoprotein P, HLAB, CYP1A1, NRTN, Nucleoredoxin, PTPR-sigma, SH…	1.26639e-10	3.04503e-07	231	PCDHA8, FOXI2, PCDHA4, MGMT, ERR3, SIX2, AP-2A, MSH4, MILI, HOXC5, Dppa5, MIWI, SNIP, Chapsyn-110, DYLX2, BMP8A, PKC-zeta, GCR-alpha, BETA-PIX, TBX5, MSX1, OMgp, HOXA5, SLIT3, PCDHA1, CR1L, PDE6B, Mucin 4, Neurofibromin, Troponin T, cardiac, Nucleoredoxin, SPRED3, NDRG1, DLX5, MOG, PCDHA2, DEC1 (Stra13), Caspase-1, microRNA 125b-1, CNTN1 (F3), Caspr2, ZAP70, HOXB4, Thrombospondin 1, TIP30, HCN2, …	1.59307e-05	0.022218	149	CLMP, MGMT, ROR-alpha, DCDC2, PERT, TEF-1, MILI, CERT, PHL1, NGL-1, RBP4, ARG2, DYLX2, L-type Ca(II) channel, alpha 1C subunit, PKC-zeta, Basonuclin-2, Thrombopoietin, RecQL4, Protocadherin 15, CR1L, PDE6B, UNC45B, Neurofibromin, Troponin T, cardiac, Nucleoredoxin, FLG2, TAGLN2, IP3R1, BAI1, Myosin X, PAX8, ERG, Maspin, SLC38A10, CRIPTO-3, PAFAH alpha (LIS1), Formin, KIS, ACSL6, LASS3, Alpha-1D a…	0.0001113	0.00451161	108	JKAP, Cadherin 22, HLA-DQB1, NOX5, QKI, Ski, NOX4, Paralemmin, PTPR-delta, NPR3, Epimorphin, NANOS2, PCDHB4, NPRL3, Tyro3, MICALCL, p90RSK3(RPS6KA2), VPS13A, Rab-17, LRAT, C17, SLAC2-B, 1B57_HUMAN, ARSB, TBX5, ODZ2, HLA-B7, CatSper2, Ephexin, IFI17, Selenoprotein P, Mu-type opioid receptor, HLAB, NRTN, Nucleoredoxin, KIAA1853, Thyroglobulin, SIAT8D, PLD6, WNT3, Myt1L, ODZ1, Kir1.1, CD1d, HOXA3, P…	1.3349e-12	3.65762e-09	315	FOXI2, CLMP, MGMT, DCDC2, SIX2, TEF-1, MILI, CERT, NGL-1, HOXC5, MIWI, Chapsyn-110, L-type Ca(II) channel, alpha 1C subunit, BMP8A, PKC-zeta, BETA-PIX, MSX1, RecQL4, OMgp, SLIT3, PDE6B, Mucin 4, Neurofibromin, SPRED3, NDRG1, TAGLN2, MOG, IP3R1, microRNA 125b-1, CNTN1 (F3), Caspr2, HOXB4, TIP30, BLOS1, ASZ1, Maspin, Formin, ACSL6, ZNF406, HOXD12, GSH2, RHG7, Neurexin 1-alpha, CACNB2, Filaggrin, DS…
3	developmental process	5156	4.4221e-11	6.05827e-08	0.00125779	0.117996	90	JKAP, Cadherin 22, HLA-DQB1, NOX5, Ski, NOX4, Paralemmin, NANOS2, PCDHB4, Tyro3, MICALCL, p90RSK3(RPS6KA2), VPS13A, Rab-17, C17, SLAC2-B, ARSB, TBX5, ODZ2, CatSper2, IFI17, Mu-type opioid receptor, NRTN, Nucleoredoxin, Urocortin 2, CES1P1, PAR1, KIAA1853, Thyroglobulin, SIAT8D, PLD6, WNT3, Myt1L, ODZ1, Kir1.1, HOXA3, PRKAR1B, AKIP1, LDB2, NDRG4, HOXD3, Carboxypeptidase H, MLC1F, Casein kinase I (…	0.000768088	0.0211486	67	Carboxypeptidase H, MLC1F, Cadherin 22, KIAA1838, NOX5, DAB1, QKI, Ski, C19orf51, NOX4, Paralemmin, Neurotrimin, PTPR-delta, Fibromodulin, NPR3, P/Q-type calcium channel alpha-1A subunit, Epimorphin, DKKL1, NPRL3, Tyro3, NINJ2, Rab-17, GluR1, MTG16 (CBFA2T3), LRAT, 1B35_HUMAN, 1B57_HUMAN, ARSB, GLI-2, ODZ2, HLA-B7, ACM3, CHD2, ITGB3, Ephexin, Astrotactin-1, Cypher, Selenoprotein P, HLAB, CYP1A1, …	1.35155e-09	1.6249e-06	246	PCDHA8, FOXI2, PCDHA4, MGMT, ERR3, SIX2, AP-2A, MSH4, MILI, Plectin 1, Tissue factor, HOXC5, Dppa5, MIWI, SNIP, Chapsyn-110, DYLX2, BMP8A, PKC-zeta, MSRA, GCR-alpha, BETA-PIX, TBX5, MSX1, OMgp, HOXA5, SLIT3, PCDHA1, CR1L, PDE6B, Mucin 4, Neurofibromin, Troponin T, cardiac, Nucleoredoxin, SPRED3, NDRG1, DLX5, MOG, PCDHA2, DEC1 (Stra13), Caspase-1, microRNA 125b-1, CNTN1 (F3), Caspr2, ZAP70, HOXB4,…	0.000145143	0.037955	157	CLMP, MGMT, ROR-alpha, DCDC2, PERT, ADAM12, TEF-1, MILI, CERT, PHL1, NGL-1, RBP4, ARG2, DYLX2, L-type Ca(II) channel, alpha 1C subunit, PKC-zeta, Basonuclin-2, Thrombopoietin, RecQL4, Protocadherin 15, CR1L, PDE6B, UNC45B, Neurofibromin, Troponin T, cardiac, Nucleoredoxin, FLG2, TAGLN2, IP3R1, BAI1, Myosin X, PAX8, ERG, Maspin, SLC38A10, CRIPTO-3, G3PT, PAFAH alpha (LIS1), Formin, KIS, ACSL6, LAS…	2.93403e-05	0.00138755	120	JKAP, Cadherin 22, HLA-DQB1, KIAA1838, NOX5, QKI, Ski, C19orf51, NOX4, Paralemmin, PTPR-delta, NPR3, Epimorphin, NANOS2, DKKL1, PCDHB4, NPRL3, Tyro3, MICALCL, p90RSK3(RPS6KA2), VPS13A, Rab-17, LRAT, C17, SLAC2-B, 1B57_HUMAN, ARSB, TBX5, ODZ2, HLA-B7, CatSper2, Ephexin, IFI17, Selenoprotein P, Mu-type opioid receptor, HLAB, NRTN, Nucleoredoxin, Urocortin 2, CES1P1, PAR1, KIAA1853, Thyroglobulin, S…	4.4221e-11	6.05827e-08	335	FOXI2, CLMP, MGMT, DCDC2, SIX2, TEF-1, MILI, CERT, NGL-1, Plectin 1, HOXC5, MIWI, Chapsyn-110, L-type Ca(II) channel, alpha 1C subunit, BMP8A, PKC-zeta, MSRA, BETA-PIX, MSX1, RecQL4, OMgp, SLIT3, PDE6B, Mucin 4, Neurofibromin, SPRED3, NDRG1, TAGLN2, MOG, IP3R1, microRNA 125b-1, CNTN1 (F3), Caspr2, HOXB4, TIP30, BLOS1, ASZ1, Maspin, G3PT, Formin, ACSL6, ZNF406, HOXD12, GSH2, RHG7, Neurexin 1-alpha…
4	nervous system development	2138	1.73948e-10	1.69868e-07	0.0056498	0.195105	42	Cadherin 22, Ski, Paralemmin, PCDHB4, Tyro3, p90RSK3(RPS6KA2), VPS13A, Rab-17, ARSB, ODZ2, Mu-type opioid receptor, NRTN, KIAA1853, Thyroglobulin, SIAT8D, WNT3, Myt1L, ODZ1, HOXA3, NDRG4, HOXD3, Neurotrimin, ENC1, cAMP-GEFII, P/Q-type calcium channel alpha-1A subunit, IAP, Bcl-2, TBX20, NINJ2, MSK2, GLI-2, CECR2, GnRH1, Astrotactin-1, PAX3, PMCA4, RILP (REST-interacting LIM domain protein), GRHL2…	0.00106946	0.0272769	34	Cadherin 22, DAB1, QKI, Ski, Paralemmin, Neurotrimin, PTPR-delta, P/Q-type calcium channel alpha-1A subunit, Tyro3, NINJ2, Rab-17, GluR1, ARSB, GLI-2, ODZ2, ACM3, ITGB3, Ephexin, Astrotactin-1, Selenoprotein P, NRTN, PTPR-sigma, SH3TC2, KIAA1853, Thyroglobulin, NELL1, SIAT8D, MTGR1, Myt1L, Evi-1, DLL3, MACROD2, GABA-A receptor beta-3 subunit, NDRG4	7.34171e-08	3.20966e-05	119	PCDHA8, PCDHA4, AP-2A, SNIP, Chapsyn-110, DYLX2, PKC-zeta, GCR-alpha, BETA-PIX, MSX1, OMgp, SLIT3, PCDHA1, Neurofibromin, NDRG1, DLX5, MOG, PCDHA2, DEC1 (Stra13), CNTN1 (F3), Caspr2, HCN2, BAI1, BLOS1, MEL1, NCOA2 (GRIP1/TIF2), PAX8, KIAA1688, KIS, HOXB1, GCR-beta, MOBP, RHG7, Neurexin 1-alpha, Neuregulin 1, SHRM, ZFP57, Myelin basic protein, PCDHB8, CECR2, PCDHA3, PCSK9, LHX3, AHNAK, Ephrin-A re…	0.000120025	0.037955	77	ROR-alpha, DCDC2, NGL-1, DYLX2, L-type Ca(II) channel, alpha 1C subunit, PKC-zeta, Protocadherin 15, Neurofibromin, BAI1, Myosin X, PAX8, PAFAH alpha (LIS1), KIS, ACSL6, GSH2, Neurexin 1-alpha, CACNB2, Rab-40C, DSCAM, PCDHAC1, AHNAK, Bystin, ATP8A2, BMPR1A, MaxiK alpha subunit, NELL1, p73, TTC3, ZNF423, DMRT3, PCDA7, SMRT, CGAT1, SSH1L, PCDHAC2, SYNJ2, Neurexin 1-beta, RGS14, HDAC4, CLRN1, MTMR13…	0.000601604	0.019888	56	Cadherin 22, QKI, Ski, Paralemmin, PTPR-delta, PCDHB4, Tyro3, p90RSK3(RPS6KA2), VPS13A, Rab-17, ARSB, ODZ2, Ephexin, Selenoprotein P, Mu-type opioid receptor, NRTN, KIAA1853, Thyroglobulin, SIAT8D, WNT3, Myt1L, ODZ1, HOXA3, NDRG4, HOXD3, DAB1, Neurotrimin, ENC1, P/Q-type calcium channel alpha-1A subunit, cAMP-GEFII, IAP, Bcl-2, TBX20, NINJ2, GluR1, MSK2, GLI-2, CECR2, ACM3, ITGB3, GnRH1, Astrotac…	1.73948e-10	1.69868e-07	166	DCDC2, NGL-1, Chapsyn-110, L-type Ca(II) channel, alpha 1C subunit, PKC-zeta, BETA-PIX, MSX1, OMgp, SLIT3, Neurofibromin, NDRG1, MOG, CNTN1 (F3), Caspr2, BLOS1, ACSL6, GSH2, RHG7, Neurexin 1-alpha, CACNB2, DSCAM, PCDHAC1, ZFP57, Myelin basic protein, CECR2, PCDHA3, LHX3, AHNAK, ATP8A2, PAX3, BMPR1A, MaxiK alpha subunit, p73, DMRT3, PCDA7, ZNF238, CGAT1, HOXB2, HOXA1, NFIX, SYNJ2, HDAC4, CLRN1, NT…
5	anatomical structure development	4564	1.85986e-10	1.69868e-07	0.000994029	0.115732	82	Cadherin 22, HLA-DQB1, NOX5, Ski, NOX4, Paralemmin, NANOS2, PCDHB4, Tyro3, p90RSK3(RPS6KA2), VPS13A, Rab-17, C17, SLAC2-B, ARSB, TBX5, ODZ2, IFI17, Mu-type opioid receptor, NRTN, Nucleoredoxin, Urocortin 2, CES1P1, PAR1, KIAA1853, Thyroglobulin, SIAT8D, PLD6, WNT3, Myt1L, ODZ1, Kir1.1, HOXA3, PRKAR1B, AKIP1, LDB2, NDRG4, HOXD3, Carboxypeptidase H, MLC1F, Casein kinase I (alpha-like), SETDB1, LASS…	5.91663e-05	0.00207768	65	Carboxypeptidase H, MLC1F, Cadherin 22, NOX5, DAB1, QKI, Ski, C19orf51, NOX4, Paralemmin, Neurotrimin, PTPR-delta, Fibromodulin, NPR3, P/Q-type calcium channel alpha-1A subunit, Epimorphin, DKKL1, NPRL3, Tyro3, NINJ2, Rab-17, GluR1, MTG16 (CBFA2T3), LRAT, 1B35_HUMAN, 1B57_HUMAN, ARSB, GLI-2, ODZ2, HLA-B7, ACM3, CHD2, ITGB3, Ephexin, Astrotactin-1, Cypher, Selenoprotein P, HLAB, CYP1A1, NRTN, Nucl…	1.50637e-08	1.03488e-05	219	PCDHA8, FOXI2, PCDHA4, MGMT, SIX2, AP-2A, MSH4, MILI, Plectin 1, HOXC5, MIWI, SNIP, Chapsyn-110, DYLX2, BMP8A, PKC-zeta, GCR-alpha, BETA-PIX, TBX5, MSX1, OMgp, HOXA5, SLIT3, PCDHA1, CR1L, PDE6B, Mucin 4, Neurofibromin, Troponin T, cardiac, Nucleoredoxin, NDRG1, DLX5, MOG, PCDHA2, DEC1 (Stra13), Caspase-1, microRNA 125b-1, CNTN1 (F3), Caspr2, ZAP70, HOXB4, Thrombospondin 1, TIP30, HCN2, BAI1, BLOS…	0.000137263	0.037955	142	CLMP, MGMT, ROR-alpha, DCDC2, PERT, ADAM12, TEF-1, MILI, CERT, PHL1, NGL-1, RBP4, ARG2, DYLX2, L-type Ca(II) channel, alpha 1C subunit, PKC-zeta, Basonuclin-2, Thrombopoietin, RecQL4, Protocadherin 15, CR1L, PDE6B, UNC45B, Neurofibromin, Troponin T, cardiac, Nucleoredoxin, FLG2, TAGLN2, BAI1, Myosin X, PAX8, Maspin, SLC38A10, CRIPTO-3, G3PT, PAFAH alpha (LIS1), Formin, KIS, ACSL6, LASS3, ZNF406, …	9.79983e-06	0.00051336	111	Cadherin 22, HLA-DQB1, NOX5, QKI, Ski, C19orf51, NOX4, Paralemmin, PTPR-delta, NPR3, Epimorphin, NANOS2, DKKL1, PCDHB4, NPRL3, Tyro3, p90RSK3(RPS6KA2), VPS13A, Rab-17, LRAT, C17, SLAC2-B, 1B57_HUMAN, ARSB, TBX5, ODZ2, HLA-B7, Ephexin, IFI17, Selenoprotein P, Mu-type opioid receptor, HLAB, NRTN, Nucleoredoxin, Urocortin 2, CES1P1, PAR1, KIAA1853, Thyroglobulin, SIAT8D, PLD6, WNT3, Myt1L, ODZ1, Kir…	1.85986e-10	1.69868e-07	301	FOXI2, CLMP, MGMT, DCDC2, SIX2, TEF-1, MILI, CERT, NGL-1, Plectin 1, HOXC5, MIWI, Chapsyn-110, L-type Ca(II) channel, alpha 1C subunit, BMP8A, PKC-zeta, BETA-PIX, MSX1, RecQL4, OMgp, SLIT3, PDE6B, Mucin 4, Neurofibromin, NDRG1, TAGLN2, MOG, microRNA 125b-1, CNTN1 (F3), Caspr2, HOXB4, TIP30, BLOS1, ASZ1, Maspin, G3PT, Formin, ACSL6, ZNF406, HOXD12, GSH2, RHG7, Neurexin 1-alpha, CACNB2, Filaggrin, …
6	single-multicellular organism process	6314	5.2308e-10	4.09497e-07	0.000543471	0.0888535	108	JKAP, SLC7A9, FAM134B, Cadherin 22, HLA-DQB1, NOX5, Ski, NOX4, Paralemmin, NF-AT5, NANOS2, PCDHB4, HTR4, CARD7, Tyro3, MICALCL, PDE10A, Tenascin-X, p90RSK3(RPS6KA2), VPS13A, PANX2, Rab-17, Enkephalin A, C17, OR8D4, SLAC2-B, ARSB, TBX5, ODZ2, CatSper2, IFI17, Mu-type opioid receptor, NRTN, Nucleoredoxin, Urocortin 2, PAR1, KIAA1853, Thyroglobulin, SIAT8D, PCDH21, PLD6, APOC2, OR7A5, WNT3, Myt1L, O…	0.00280336	0.0595838	76	Carboxypeptidase H, FAM134B, MLC1F, Cadherin 22, NOX5, DAB1, QKI, Collagen XXVI, Ski, NOX4, Paralemmin, Neurotrimin, PTPR-delta, Fibromodulin, NPR3, NF-AT5, OMA1, P/Q-type calcium channel alpha-1A subunit, Epimorphin, Syntaxin 1B, NPRL3, CARD7, Tyro3, NINJ2, PANX2, Rab-17, GluR1, MTG16 (CBFA2T3), LRAT, 1B35_HUMAN, GRIK4, 1B57_HUMAN, ARSB, GLI-2, ODZ2, HLA-B7, CD244, ACM3, CHD2, ITGB3, Ephexin, As…	5.1812e-09	4.15273e-06	286	PCDHA8, FOXI2, PCDHA4, MGMT, Collagen XXIII, ERR3, SIX2, AP-2A, HEPHL1, ZAN, MSH4, MILI, Tissue factor, HOXC5, Tenascin-X, Dppa5, MIWI, SNIP, Chapsyn-110, LTBR2, DYLX2, BMP8A, ERCC6, PKC-zeta, GCR-alpha, BETA-PIX, TBX5, MSX1, Galpha(i)-specificTHR&S GPCR (motilin receptor), OMgp, NR3B, HOXA5, SLIT3, PCDHA1, CR1L, PDE6B, Myomesin 2, Mucin 4, Neurofibromin, Troponin T, cardiac, Nucleoredoxin, SPRED…	0.000211003	0.0465925	185	CLMP, MGMT, ROR-alpha, DCDC2, HEPHL1, PERT, TEF-1, MILI, CERT, PHL1, NGL-1, RBP4, RIMS1, ARG2, DYLX2, L-type Ca(II) channel, alpha 1C subunit, PKC-zeta, Basonuclin-2, Thrombopoietin, RecQL4, UNC13C, Protocadherin 15, CR1L, Kv4.3 channel, PDE6B, Myomesin 2, UNC45B, Neurofibromin, Troponin T, cardiac, Nucleoredoxin, FLG2, TAGLN2, IP3R1, Beta TnTF, BAI1, Myosin X, LMF1, PAX8, TUSC3, ERG, Maspin, SLC…	1.645e-05	0.000823711	142	JKAP, SLC7A9, FAM134B, Cadherin 22, HLA-DQB1, NOX5, QKI, Collagen XXVI, Ski, NOX4, Paralemmin, PTPR-delta, NPR3, NF-AT5, OMA1, Epimorphin, NANOS2, PCDHB4, HTR4, NPRL3, CARD7, Tyro3, MICALCL, PDE10A, Tenascin-X, p90RSK3(RPS6KA2), VPS13A, PANX2, Rab-17, Enkephalin A, LRAT, C17, OR8D4, GRIK4, SLAC2-B, 1B57_HUMAN, ARSB, TBX5, ODZ2, HLA-B7, CatSper2, Ephexin, IFI17, Selenoprotein P, Mu-type opioid rec…	5.2308e-10	4.09497e-07	389	FOXI2, CLMP, MGMT, DCDC2, SIX2, TEF-1, MILI, CERT, NGL-1, HOXC5, MIWI, Chapsyn-110, L-type Ca(II) channel, alpha 1C subunit, BMP8A, ERCC6, PKC-zeta, BETA-PIX, MSX1, RecQL4, Galpha(i)-specificTHR&S GPCR (motilin receptor), OMgp, NR3B, SLIT3, UNC13C, Kv4.3 channel, PDE6B, Myomesin 2, Mucin 4, Neurofibromin, SPRED3, NDRG1, TAGLN2, MOG, IP3R1, microRNA 125b-1, CNTN1 (F3), Caspr2, HOXB4, Beta TnTF, TI…
7	single-organism developmental process	3921	1.78861e-09	1.2252e-06	0.00807114	0.222815	68	Cadherin 22, HLA-DQB1, NOX5, Ski, NOX4, Paralemmin, NANOS2, Tyro3, p90RSK3(RPS6KA2), C17, SLAC2-B, TBX5, ODZ2, IFI17, NRTN, Urocortin 2, Thyroglobulin, SIAT8D, PLD6, WNT3, Kir1.1, HOXA3, PRKAR1B, AKIP1, LDB2, NDRG4, HOXD3, Carboxypeptidase H, MLC1F, Casein kinase I (alpha-like), SETDB1, DMRT2, Neurotrimin, Fibromodulin, cAMP-GEFII, P/Q-type calcium channel alpha-1A subunit, DPPA3, IAP, Bcl-2, TBX…	0.0078474	0.124161	50	Carboxypeptidase H, MLC1F, Cadherin 22, NOX5, DAB1, QKI, Ski, C19orf51, NOX4, Paralemmin, Neurotrimin, Fibromodulin, P/Q-type calcium channel alpha-1A subunit, Epimorphin, NPRL3, Tyro3, NINJ2, MTG16 (CBFA2T3), LRAT, 1B35_HUMAN, 1B57_HUMAN, GLI-2, ODZ2, HLA-B7, CHD2, ITGB3, Cypher, Selenoprotein P, HLAB, CYP1A1, NRTN, B-chimaerin, PTPR-sigma, SH3TC2, G-protein alpha-12, Thyroglobulin, SIAT8D, 1B08…	4.74834e-08	2.5372e-05	192	FOXI2, PCDHA4, MGMT, SIX2, AP-2A, MSH4, MILI, Tissue factor, HOXC5, MIWI, SNIP, Chapsyn-110, BMP8A, PKC-zeta, MSRA, GCR-alpha, TBX5, MSX1, OMgp, HOXA5, SLIT3, CR1L, PDE6B, Mucin 4, Neurofibromin, Troponin T, cardiac, NDRG1, DLX5, Caspase-1, microRNA 125b-1, CNTN1 (F3), Caspr2, ZAP70, HOXB4, Thrombospondin 1, TIP30, HCN2, BAI1, BLOS1, MEL1, PRKAR1B, NCOA2 (GRIP1/TIF2), TCF21, PAX8, ASZ1, KIAA1688,…	0.0011743	0.0926676	120	CLMP, MGMT, ROR-alpha, DCDC2, PERT, ADAM12, TEF-1, MILI, CERT, PHL1, RBP4, ARG2, L-type Ca(II) channel, alpha 1C subunit, PKC-zeta, Basonuclin-2, Thrombopoietin, RecQL4, Protocadherin 15, CR1L, PDE6B, UNC45B, Neurofibromin, Troponin T, cardiac, TAGLN2, BAI1, Myosin X, PAX8, Maspin, SLC38A10, CRIPTO-3, G3PT, PAFAH alpha (LIS1), Formin, KIS, ACSL6, Alpha-1D adrenergic receptor, ZNF406, GSH2, CRISPL…	0.0013971	0.0406591	89	Cadherin 22, HLA-DQB1, NOX5, QKI, Ski, C19orf51, NOX4, Paralemmin, Epimorphin, NANOS2, NPRL3, Tyro3, p90RSK3(RPS6KA2), LRAT, C17, SLAC2-B, 1B57_HUMAN, TBX5, ODZ2, HLA-B7, IFI17, Selenoprotein P, HLAB, NRTN, Urocortin 2, Thyroglobulin, SIAT8D, PLD6, WNT3, Kir1.1, CD1d, HOXA3, PRKAR1B, AKIP1, LDB2, NDRG4, HOXD3, Carboxypeptidase H, MLC1F, DAB1, Casein kinase I (alpha-like), SETDB1, DMRT2, Neurotrim…	1.78861e-09	1.2252e-06	262	FOXI2, CLMP, MGMT, DCDC2, SIX2, TEF-1, MILI, CERT, HOXC5, MIWI, Chapsyn-110, L-type Ca(II) channel, alpha 1C subunit, BMP8A, PKC-zeta, MSRA, MSX1, RecQL4, OMgp, SLIT3, PDE6B, Mucin 4, Neurofibromin, NDRG1, TAGLN2, microRNA 125b-1, CNTN1 (F3), Caspr2, HOXB4, TIP30, BLOS1, ASZ1, Maspin, G3PT, Formin, ACSL6, ZNF406, HOXD12, GSH2, RHG7, Neurexin 1-alpha, CACNB2, DSCAM, DMP4, ARCGAP22, GATA-4, ZFP57, …
8	multicellular organismal process	6570	1.03373e-08	4.72072e-06	0.0011071	0.116436	110	JKAP, SLC7A9, FAM134B, Cadherin 22, HLA-DQB1, NOX5, Ski, NOX4, Paralemmin, NF-AT5, NANOS2, PCDHB4, HTR4, CARD7, Tyro3, MICALCL, PDE10A, Tenascin-X, p90RSK3(RPS6KA2), VPS13A, PANX2, Rab-17, Enkephalin A, C17, OR8D4, SLAC2-B, ARSB, TBX5, ODZ2, CatSper2, IFI17, Mu-type opioid receptor, NRTN, Nucleoredoxin, Urocortin 2, PAR1, KIAA1853, Thyroglobulin, SIAT8D, PCDH21, PLD6, APOC2, OR7A5, WNT3, Myt1L, O…	0.005675	0.0968347	77	Carboxypeptidase H, FAM134B, MLC1F, Cadherin 22, NOX5, DAB1, QKI, Collagen XXVI, Ski, NOX4, Paralemmin, Neurotrimin, PTPR-delta, Fibromodulin, NPR3, NF-AT5, OMA1, P/Q-type calcium channel alpha-1A subunit, Epimorphin, Syntaxin 1B, NPRL3, CARD7, Tyro3, NINJ2, PANX2, Rab-17, GluR1, MTG16 (CBFA2T3), LRAT, 1B35_HUMAN, GRIK4, 1B57_HUMAN, ARSB, GLI-2, ODZ2, HLA-B7, CD244, ACM3, CHD2, ITGB3, Ephexin, As…	6.42551e-08	3.09003e-05	290	PCDHA8, FOXI2, PCDHA4, MGMT, Collagen XXIII, ERR3, SIX2, AP-2A, HEPHL1, ZAN, MSH4, MILI, Plectin 1, Tissue factor, HOXC5, Tenascin-X, Dppa5, MIWI, SNIP, Chapsyn-110, LTBR2, DYLX2, BMP8A, ERCC6, PKC-zeta, GCR-alpha, BETA-PIX, TBX5, MSX1, Galpha(i)-specificTHR&S GPCR (motilin receptor), OMgp, NR3B, HOXA5, SLIT3, PCDHA1, CR1L, PDE6B, Myomesin 2, Mucin 4, Neurofibromin, Troponin T, cardiac, Nucleored…	0.000714403	0.0711682	188	CLMP, MGMT, ROR-alpha, DCDC2, HEPHL1, PERT, TEF-1, MILI, CERT, PHL1, NGL-1, RBP4, RIMS1, ARG2, DYLX2, L-type Ca(II) channel, alpha 1C subunit, PKC-zeta, Basonuclin-2, Thrombopoietin, RecQL4, UNC13C, Protocadherin 15, CR1L, Kv4.3 channel, PDE6B, Myomesin 2, UNC45B, Neurofibromin, Troponin T, cardiac, Nucleoredoxin, FLG2, TAGLN2, IP3R1, WDR33, Beta TnTF, BAI1, Myosin X, LMF1, PAX8, TUSC3, ERG, Masp…	5.93536e-05	0.00259101	144	JKAP, SLC7A9, FAM134B, Cadherin 22, HLA-DQB1, NOX5, QKI, Collagen XXVI, Ski, NOX4, Paralemmin, PTPR-delta, NPR3, NF-AT5, OMA1, Epimorphin, NANOS2, PCDHB4, HTR4, NPRL3, CARD7, Tyro3, MICALCL, PDE10A, Tenascin-X, p90RSK3(RPS6KA2), VPS13A, PANX2, Rab-17, Enkephalin A, LRAT, C17, OR8D4, GRIK4, SLAC2-B, 1B57_HUMAN, ARSB, TBX5, ODZ2, HLA-B7, CatSper2, Ephexin, IFI17, Selenoprotein P, Mu-type opioid rec…	1.03373e-08	4.72072e-06	395	FOXI2, CLMP, MGMT, DCDC2, SIX2, TEF-1, MILI, CERT, NGL-1, Plectin 1, HOXC5, MIWI, Chapsyn-110, L-type Ca(II) channel, alpha 1C subunit, BMP8A, ERCC6, PKC-zeta, BETA-PIX, MSX1, RecQL4, Galpha(i)-specificTHR&S GPCR (motilin receptor), OMgp, NR3B, SLIT3, UNC13C, Kv4.3 channel, PDE6B, Myomesin 2, Mucin 4, Neurofibromin, SPRED3, NDRG1, TAGLN2, MOG, IP3R1, microRNA 125b-1, CNTN1 (F3), WDR33, Caspr2, HO…
9	cell differentiation	3043	8.62595e-08	3.37644e-05	0.00200418	0.134895	58	HLA-DQB1, Ski, NOX4, Paralemmin, NANOS2, Tyro3, MICALCL, p90RSK3(RPS6KA2), Rab-17, C17, SLAC2-B, TBX5, ODZ2, CatSper2, Mu-type opioid receptor, NRTN, Nucleoredoxin, KIAA1853, SIAT8D, PLD6, WNT3, Myt1L, AKIP1, LDB2, NDRG4, HOXD3, LASS3, Neurotrimin, cAMP-GEFII, P/Q-type calcium channel alpha-1A subunit, IAP, Bcl-2, TBX20, DMP4, ANKRD2, MTG16 (CBFA2T3), MSK2, GLI-2, CECR2, GnRH1, DACT2, Astrotactin…	0.0302443	0.249259	38	KIAA1838, DAB1, QKI, Ski, NOX4, Paralemmin, Neurotrimin, PTPR-delta, P/Q-type calcium channel alpha-1A subunit, Epimorphin, Tyro3, Rab-17, MTG16 (CBFA2T3), GLI-2, ODZ2, CHD2, ITGB3, Ephexin, Astrotactin-1, Cypher, CYP1A1, NRTN, Nucleoredoxin, B-chimaerin, SH3TC2, G-protein alpha-12, KIAA1853, NELL1, SIAT8D, MTGR1, Myt1L, Evi-1, DLL3, CD1d, GABA-A receptor beta-3 subunit, HEPH, LDB2, NDRG4	3.21377e-06	0.000735954	149	FOXI2, MGMT, SIX2, AP-2A, MILI, Plectin 1, MIWI, SNIP, Chapsyn-110, DYLX2, BMP8A, PKC-zeta, GCR-alpha, BETA-PIX, TBX5, MSX1, OMgp, HOXA5, SLIT3, Neurofibromin, Troponin T, cardiac, Nucleoredoxin, NDRG1, DLX5, Caspase-1, microRNA 125b-1, CNTN1 (F3), Caspr2, ZAP70, HOXB4, TIP30, BAI1, BLOS1, MEL1, TCF21, PAX8, ASZ1, KIAA1688, CRIPTO-3, G3PT, A2M, KIS, LASS3, GCR-beta, ZNF406, Neurexin 1-alpha, Neur…	0.000318279	0.0493215	100	MGMT, ROR-alpha, DCDC2, ADAM12, MILI, PHL1, NGL-1, DYLX2, L-type Ca(II) channel, alpha 1C subunit, PKC-zeta, Thrombopoietin, Protocadherin 15, UNC45B, Neurofibromin, Troponin T, cardiac, Nucleoredoxin, FLG2, BAI1, Myosin X, PAX8, CRIPTO-3, G3PT, PAFAH alpha (LIS1), KIS, ACSL6, LASS3, ZNF406, GSH2, Neurexin 1-alpha, CACNB2, Filaggrin, DSCAM, ARCGAP22, DMP4, GATA-4, Bystin, VAMP3, ATP8A2, B-chimaer…	0.00253623	0.0634989	71	HLA-DQB1, KIAA1838, QKI, Ski, NOX4, Paralemmin, PTPR-delta, Epimorphin, NANOS2, Tyro3, MICALCL, p90RSK3(RPS6KA2), Rab-17, C17, SLAC2-B, TBX5, ODZ2, CatSper2, Ephexin, Mu-type opioid receptor, NRTN, Nucleoredoxin, KIAA1853, SIAT8D, PLD6, WNT3, Myt1L, CD1d, AKIP1, LDB2, NDRG4, HOXD3, DAB1, LASS3, Neurotrimin, P/Q-type calcium channel alpha-1A subunit, cAMP-GEFII, IAP, Bcl-2, TBX20, DMP4, ANKRD2, MT…	8.62595e-08	3.37644e-05	206	FOXI2, MGMT, DCDC2, SIX2, MILI, NGL-1, Plectin 1, MIWI, Chapsyn-110, L-type Ca(II) channel, alpha 1C subunit, BMP8A, PKC-zeta, BETA-PIX, MSX1, OMgp, SLIT3, Neurofibromin, NDRG1, microRNA 125b-1, CNTN1 (F3), Caspr2, HOXB4, TIP30, BLOS1, ASZ1, G3PT, ACSL6, ZNF406, GSH2, Neurexin 1-alpha, CACNB2, Filaggrin, DSCAM, DMP4, ARCGAP22, GATA-4, Myelin basic protein, CECR2, LR8, LHX3, VAMP3, ATP8A2, PAX3, B…
10	cellular developmental process	3165	4.54906e-07	0.000155805	0.00305523	0.150297	59	HLA-DQB1, Ski, NOX4, Paralemmin, NANOS2, Tyro3, MICALCL, p90RSK3(RPS6KA2), Rab-17, C17, SLAC2-B, TBX5, ODZ2, CatSper2, Mu-type opioid receptor, NRTN, Nucleoredoxin, KIAA1853, SIAT8D, PLD6, WNT3, Myt1L, AKIP1, LDB2, NDRG4, HOXD3, Casein kinase I (alpha-like), LASS3, Neurotrimin, cAMP-GEFII, P/Q-type calcium channel alpha-1A subunit, IAP, Bcl-2, TBX20, DMP4, ANKRD2, MTG16 (CBFA2T3), MSK2, GLI-2, CE…	0.0339112	0.265199	39	KIAA1838, DAB1, QKI, Ski, C19orf51, NOX4, Paralemmin, Neurotrimin, PTPR-delta, P/Q-type calcium channel alpha-1A subunit, Epimorphin, Tyro3, Rab-17, MTG16 (CBFA2T3), GLI-2, ODZ2, CHD2, ITGB3, Ephexin, Astrotactin-1, Cypher, CYP1A1, NRTN, Nucleoredoxin, B-chimaerin, SH3TC2, G-protein alpha-12, KIAA1853, NELL1, SIAT8D, MTGR1, Myt1L, Evi-1, DLL3, CD1d, GABA-A receptor beta-3 subunit, HEPH, LDB2, NDR…	1.16845e-05	0.00160545	151	FOXI2, MGMT, SIX2, AP-2A, MILI, Plectin 1, MIWI, SNIP, Chapsyn-110, DYLX2, BMP8A, PKC-zeta, GCR-alpha, BETA-PIX, TBX5, MSX1, OMgp, HOXA5, SLIT3, Neurofibromin, Troponin T, cardiac, Nucleoredoxin, NDRG1, DLX5, Caspase-1, microRNA 125b-1, CNTN1 (F3), Caspr2, ZAP70, HOXB4, TIP30, BAI1, BLOS1, MEL1, TCF21, PAX8, ASZ1, KIAA1688, CRIPTO-3, G3PT, A2M, KIS, LASS3, GCR-beta, ZNF406, Neurexin 1-alpha, Neur…	0.000842896	0.0777826	101	MGMT, ROR-alpha, DCDC2, ADAM12, MILI, CERT, PHL1, NGL-1, DYLX2, L-type Ca(II) channel, alpha 1C subunit, PKC-zeta, Thrombopoietin, Protocadherin 15, UNC45B, Neurofibromin, Troponin T, cardiac, Nucleoredoxin, FLG2, BAI1, Myosin X, PAX8, CRIPTO-3, G3PT, PAFAH alpha (LIS1), KIS, ACSL6, LASS3, ZNF406, GSH2, Neurexin 1-alpha, CACNB2, Filaggrin, DSCAM, ARCGAP22, DMP4, GATA-4, Bystin, VAMP3, ATP8A2, B-c…	0.00293779	0.0689874	73	HLA-DQB1, KIAA1838, QKI, Ski, C19orf51, NOX4, Paralemmin, PTPR-delta, Epimorphin, NANOS2, Tyro3, MICALCL, p90RSK3(RPS6KA2), Rab-17, C17, SLAC2-B, TBX5, ODZ2, CatSper2, Ephexin, Mu-type opioid receptor, NRTN, Nucleoredoxin, KIAA1853, SIAT8D, PLD6, WNT3, Myt1L, CD1d, AKIP1, LDB2, NDRG4, HOXD3, DAB1, Casein kinase I (alpha-like), LASS3, Neurotrimin, P/Q-type calcium channel alpha-1A subunit, cAMP-GE…	4.54906e-07	0.000155805	209	FOXI2, MGMT, DCDC2, SIX2, MILI, CERT, NGL-1, Plectin 1, MIWI, Chapsyn-110, L-type Ca(II) channel, alpha 1C subunit, BMP8A, PKC-zeta, BETA-PIX, MSX1, OMgp, SLIT3, Neurofibromin, NDRG1, microRNA 125b-1, CNTN1 (F3), Caspr2, HOXB4, TIP30, BLOS1, ASZ1, G3PT, ACSL6, ZNF406, GSH2, Neurexin 1-alpha, CACNB2, Filaggrin, DSCAM, DMP4, ARCGAP22, GATA-4, Myelin basic protein, CECR2, LR8, LHX3, VAMP3, ATP8A2, P…
11	positive regulation of biological process	4118	6.82235e-06	0.00105897	0.00203448	0.134895	74	JKAP, HLA-DQB1, HLA-A2, NOX5, Ski, NOX4, Paralemmin, NF-AT5, HTR4, CARD7, PSMD14, Tenascin-X, p90RSK3(RPS6KA2), HLA-A68, C17, SLAC2-B, TBX5, AHRR, ODZ2, Raptor, KIAA0748, ST5, Tiam2, IFI17, Mu-type opioid receptor, PGRP-S, HLADPA1, Cyclophilin E, PAR1, APOC2, WNT3, Myt1L, ODZ1, RAIDD, HOXA3, CD40(TNFRSF5), PRKAR1B, p22-phox, LDB2, HLA-DQB2, Livin, HLA-A3, NDRG4, HOXD3, DMRT2, cAMP-GEFII, TORC1, B…	0.00483898	0.0868507	53	BAD, NOX5, DAB1, QKI, Collagen XXVI, Ski, NOX4, Paralemmin, PTPR-delta, NF-AT5, MBL2, OMA1, DKKL1, CPT-1A, CARD7, KLHL6, PSMD1, GluR1, MTG16 (CBFA2T3), 1B35_HUMAN, 1B57_HUMAN, GLI-2, AHRR, ODZ2, Raptor, HLA-B7, ACM3, ST5, ITGB3, Tiam2, Ephexin, HLAB, CYP1A1, HLADPA1, PAR1, MLC1, NELL1, 1B08_HUMAN, DPP6, MTGR1, Myt1L, Evi-1, MVD, DLL3, CD1d, LAT, 1B73, PRKAR1B, HLA-B27, HLA-DQB2, LDB2, TRIM5, NDRG4	1.01976e-05	0.00155273	188	MGMT, ERR3, SIX2, AP-2A, MBL2, ZC3HAV1, MILI, Tissue factor, Tenascin-X, PSMB1, SNIP, BMP8A, ERCC6, PKC-zeta, GCR-alpha, BETA-PIX, PRG2, TBX5, MSX1, HOXA5, CR1L, PKR, Neurofibromin, NDRG1, HLADPA1, DLX5, MOG, TAP1 (PSF1), Caspase-1, BPGAP1, microRNA 125b-1, CNTN1 (F3), ZAP70, HOXB4, Thrombospondin 1, TIP30, HCN2, MEL1, PRKAR1B, NCOA2 (GRIP1/TIF2), TCF21, Aurora-C, PAX8, HLA-DQB2, G3PT, Leukocyte …	0.00352461	0.124014	122	MGMT, ROR-alpha, TEF-1, MILI, PHL1, RBP4, RIMS1, PKC-zeta, Helios, ZNF205, Thrombopoietin, RecQL4, CR1L, PKR, Neurofibromin, USF1, IP3R1, TIGAR (C12orf5), Myosin X, PAX8, Livin, G3PT, PAFAH alpha (LIS1), Formin, KIS, ACSL6, Alpha-1D adrenergic receptor, MAPRE3(EB3), GSH2, LRH1, Neurexin 1-alpha, CACNB2, DSCAM, Capsaicin receptor, DMP4, PSMD3, GATA-4, eEF1D, RAMP1, H-cadherin, PF4, EBF3, C3, VAMP3…	2.31768e-05	0.00112739	101	JKAP, BAD, HLA-DQB1, HLA-A2, NOX5, QKI, Collagen XXVI, Ski, NOX4, Paralemmin, PTPR-delta, NF-AT5, MBL2, OMA1, DKKL1, HTR4, CARD7, PSMD14, Tenascin-X, p90RSK3(RPS6KA2), HLA-A68, C17, SLAC2-B, 1B57_HUMAN, TBX5, AHRR, ODZ2, Raptor, HLA-B7, KIAA0748, ST5, Tiam2, Ephexin, IFI17, Mu-type opioid receptor, HLAB, PGRP-S, HLADPA1, Cyclophilin E, PAR1, APOC2, WNT3, Myt1L, RAIDD, ODZ1, MVD, CD1d, HOXA3, LAT,…	6.82235e-06	0.00105897	253	MGMT, SIX2, TEF-1, MBL2, MILI, PSMB1, BMP8A, ERCC6, PKC-zeta, BETA-PIX, Helios, ZNF205, MSX1, RecQL4, Neurofibromin, NDRG1, HLADPA1, MOG, IP3R1, TAP1 (PSF1), microRNA 125b-1, CNTN1 (F3), HOXB4, TIP30, TIGAR (C12orf5), HLA-DQB2, Leukocyte elastase, G3PT, Formin, ACSL6, GSH2, RHG7, Neurexin 1-alpha, CACNB2, CRIM2, DSCAM, DMP4, PSMD3, GATA-4, H-cadherin, LHX3, MLK3(MAP3K11), VAMP3, ATP8A2, STIM1, PA…
12	regulation of multicellular organismal process	2332	2.40274e-05	0.00287322	0.0230931	0.25146	42	NOX5, Ski, Paralemmin, CARD7, Rab-17, TBX5, KIAA0748, IFI17, Mu-type opioid receptor, PGRP-S, Urocortin 2, PAR1, Thyroglobulin, APOC2, WNT3, CD40(TNFRSF5), p22-phox, NDRG4, HOXD3, Carboxypeptidase H, DMRT2, Neurotrimin, cAMP-GEFII, P/Q-type calcium channel alpha-1A subunit, Bcl-2, TBX20, DMP4, MSK2, GLI-2, HTR2A, GnRH1, HTR2B, GATA-6, PAX3, GPR39, RILP (REST-interacting LIM domain protein), IBP3,…	0.0141718	0.184614	32	Carboxypeptidase H, BAD, NOX5, DAB1, Ski, Paralemmin, Neurotrimin, PTPR-delta, OMA1, P/Q-type calcium channel alpha-1A subunit, CARD7, Rab-17, GluR1, 1B35_HUMAN, 1B57_HUMAN, GLI-2, HLA-B7, ACM3, ITGB3, Ephexin, HLAB, RIMS4, PAR1, Thyroglobulin, NELL1, 1B08_HUMAN, MTGR1, DLL3, CD1d, 1B73, HLA-B27, NDRG4	0.000261127	0.012946	111	AP-2A, ZAN, ZC3HAV1, Tissue factor, SNIP, DYLX2, BMP8A, PKC-zeta, GCR-alpha, PRG2, TBX5, MSX1, OMgp, HOXA5, PKR, HCA112, Neurofibromin, Troponin T, cardiac, DLX5, DEC1 (Stra13), Caspase-1, CNTN1 (F3), ZAP70, Thrombospondin 1, Beta TnTF, TIP30, HCN2, BAI1, MEL1, PAX8, Leukocyte elastase, Kallikrein 1, PDE4B, GCR-beta, Neurexin 1-alpha, Neuregulin 1, Capsaicin receptor, DMP4, HA2Z, GATA-4, Myelin b…	0.00162894	0.0986412	77	PHL1, NGL-1, RBP4, RIMS1, ARG2, DYLX2, L-type Ca(II) channel, alpha 1C subunit, PKC-zeta, UNC13C, PKR, Neurofibromin, Troponin T, cardiac, USF1, Beta TnTF, BAI1, PAX8, PAFAH alpha (LIS1), ACSL6, Alpha-1D adrenergic receptor, GSH2, Neurexin 1-alpha, DSCAM, Capsaicin receptor, DMP4, GATA-4, PF4, C3, CCKBR, ATP8A2, BMPR1A, MaxiK alpha subunit, NELL1, p73, TTC3, KCNQ1, DMRT3, SSH1L, ZFPM1 (FOG), CLEC…	0.000335251	0.0118909	61	BAD, NOX5, Ski, Paralemmin, PTPR-delta, OMA1, CARD7, Rab-17, 1B57_HUMAN, TBX5, HLA-B7, KIAA0748, Ephexin, IFI17, Mu-type opioid receptor, HLAB, RIMS4, PGRP-S, Urocortin 2, PAR1, Thyroglobulin, APOC2, WNT3, CD1d, CD40(TNFRSF5), p22-phox, NDRG4, HOXD3, Carboxypeptidase H, DAB1, DMRT2, Neurotrimin, P/Q-type calcium channel alpha-1A subunit, cAMP-GEFII, Bcl-2, TBX20, DMP4, GluR1, MSK2, 1B35_HUMAN, GL…	2.40274e-05	0.00287322	154	NGL-1, L-type Ca(II) channel, alpha 1C subunit, BMP8A, PKC-zeta, MSX1, OMgp, UNC13C, HCA112, Neurofibromin, CNTN1 (F3), Beta TnTF, TIP30, Leukocyte elastase, ACSL6, GSH2, Neurexin 1-alpha, DSCAM, DMP4, HA2Z, GATA-4, Myelin basic protein, CHSY1, LR8, ATP8A2, PAX3, BMPR1A, MaxiK alpha subunit, p73, KCNQ1, DMRT3, CLEC2A, AIM2, HDAC4, Activin beta A, Liprin-alpha3, BMP8B, DLX2, CELSR1, EDNRB, RUFY3, …
13	response to external stimulus	1412	6.36221e-05	0.00608342	0.0122627	0.222815	29	HLA-A2, HTR4, p90RSK3(RPS6KA2), AFAP, HLA-A68, Enkephalin A, ARSB, GCN2, ODZ2, Raptor, Mu-type opioid receptor, NRTN, PGRP-S, SIAT8D, APOC2, WNT3, RAIDD, CD40(TNFRSF5), p22-phox, HLA-A3, P/Q-type calcium channel alpha-1A subunit, Bcl-2, HLA-A11, MSK2, GLI-2, HTR2A, CYP1A1, Evi-1, Urocortin 3	0.0113142	0.153153	22	BAD, P/Q-type calcium channel alpha-1A subunit, AFAP, LRAT, 1B35_HUMAN, 1B57_HUMAN, ARSB, GCN2, GLI-2, ODZ2, Raptor, HLA-B7, ITGB3, HLAB, CYP1A1, NRTN, SIAT8D, 1B08_HUMAN, Evi-1, CD1d, 1B73, HLA-B27	0.001477	0.0388137	70	MGMT, Plectin 1, Tissue factor, LTBR2, ATG4C, SLIT3, PDE6B, PKR, Mucin 4, DLX5, DEC1 (Stra13), Caspase-1, DHSO, CNTN1 (F3), Thrombospondin 1, KIAA1688, A2M, Kallikrein 1, PDE4B, Neurexin 1-alpha, SHRM, GATA-4, CHSY1, PF4, PCSK9, C3, LHX3, Ephrin-A receptor 4, ACAT2, Neutral sphingomyelinase, GLUT1, SOAT2, PDXK, CXCR6, Alpha-N-catenin, MEIS2, HOXA1, COL9A1, Neurexin 1-beta, ABCR, Beta-fodrin, p90R…	0.0078557	0.162745	48	MGMT, RBP4, ARG2, L-type Ca(II) channel, alpha 1C subunit, Protocadherin 15, PDE6B, PKR, USF1, Myosin X, ACSL6, Neurexin 1-alpha, CACNB2, BCDO, GATA-4, PF4, C3, MaxiK alpha subunit, Neurexin 1-beta, ABCR, VTI1B, COL4A1, ARSB, Raptor, BMPR1B, mGluR8, PC1, Alpha-1A adrenergic receptor, PON1, NPAS3, SHANK2, Neuropilin-1, Gpc6, Spectrin beta 4, FGFR1, FOXP1, CHMP1A, HTR2A, PDGF-R-alpha, CACNA1D, Anky…	0.000964977	0.0300503	40	BAD, HLA-A2, HTR4, p90RSK3(RPS6KA2), HLA-A68, AFAP, Enkephalin A, LRAT, 1B57_HUMAN, ARSB, GCN2, ODZ2, Raptor, HLA-B7, Mu-type opioid receptor, HLAB, NRTN, PGRP-S, SIAT8D, APOC2, WNT3, RAIDD, CD1d, CD40(TNFRSF5), p22-phox, HLA-A3, P/Q-type calcium channel alpha-1A subunit, Bcl-2, HLA-A11, MSK2, 1B35_HUMAN, GLI-2, HTR2A, ITGB3, CYP1A1, 1B08_HUMAN, Evi-1, 1B73, Urocortin 3, HLA-B27	6.36221e-05	0.00608342	100	MGMT, Plectin 1, L-type Ca(II) channel, alpha 1C subunit, SLIT3, PDE6B, Mucin 4, CNTN1 (F3), ACSL6, Neurexin 1-alpha, CACNB2, GATA-4, CHSY1, LHX3, GLUT1, MaxiK alpha subunit, SOAT2, HOXA1, p90RSK3(RPS6KA2), VTI1B, COL4A1, SDHL, Raptor, Brca1, EDNRB, ACADM, NPAS3, SHANK2, Gpc6, Spectrin beta 4, CHMP1A, HOXA2, PIKE(CENTG1), PDGF-R-alpha, Ankyrin-B, ISL2, Mindin, PLA2G1B, KCNQ2, FEZ2, DARP, RBP4, Ti…
14	single-organism cellular process	10827	0.00157291	0.049824	0.00201297	0.134895	164	JKAP, SLC7A9, KCNK15, Cadherin 22, HLA-DQB1, HLA-A2, NOX5, Ski, NOX4, Paralemmin, ASB16, SLURP1, NF-AT5, NANOS2, NHE3, PCDHB4, HTR4, CARD7, PSMD14, Tyro3, MICALCL, PDE10A, Tenascin-X, p90RSK3(RPS6KA2), VPS13A, AFAP, HLA-A68, PANX2, Rab-17, Enkephalin A, C17, OR8D4, SLAC2-B, ASCT2 (SLC1A5), ARSB, GCN2, TBX5, AHRR, ODZ2, Raptor, CatSper2, Tiam2, IFI17, Mu-type opioid receptor, NRTN, Nucleoredoxin, …	0.0201471	0.226002	113	Carboxypeptidase H, BAD, GPR133, MLC1F, Cadherin 22, KIAA1838, NOX5, GANP, DAB1, QKI, TBCD, Collagen XXVI, Ski, C19orf51, NOX4, Paralemmin, PCGF1, ASB16, Neurotrimin, PTPR-delta, Fibromodulin, SLURP1, NPR3, NF-AT5, OMA1, DYNC1I1, P/Q-type calcium channel alpha-1A subunit, Epimorphin, DKKL1, CENTG2, NHE3, CPT-1A, Syntaxin 1B, CARD7, Tyro3, KLHL6, NINJ2, PSMD1, AFAP, PANX2, Rab-17, GluR1, MTG16 (CB…	0.007983	0.113246	403	PCDHA8, FOXI2, SCAP2, ARHGAP20, PCDHA4, MGMT, Collagen XXIII, ERR3, SIX2, ATP6V1G1, AP-2A, HEPHL1, SLC25A22, CUTL2, CIDE-B, ZAN, DNAH5, ZC3HAV1, MSH4, MILI, Plectin 1, ITGA10, Septin 8, Tissue factor, Tenascin-X, PSMB1, MIWI, SNIP, Chapsyn-110, LTBR2, DYLX2, InPP5A, BMP8A, ERCC6, SORCS2, PKC-zeta, GCR-alpha, ATG4C, BETA-PIX, SES1, TBX5, FYCO1, MSX1, Galpha(i)-specificTHR&S GPCR (motilin receptor)…	0.00563373	0.147322	282	MGMT, ROR-alpha, DCDC2, ATP5F1, HEPHL1, PERT, ADAM12, TEF-1, MILI, CERT, Gpr156, PHL1, NGL-1, RBP4, LDHC, Septin 8, RIMS1, ARG2, VLCSH1, DYLX2, L-type Ca(II) channel, alpha 1C subunit, SORCS2, PKC-zeta, Cadherin 18 (or 14), type II, Thrombopoietin, FYCO1, RecQL4, UNC13C, Protocadherin 15, Kv4.3 channel, PDE6B, PKR, UNC45B, Neurofibromin, Troponin T, cardiac, Nucleoredoxin, FLG2, USF1, IP3R1, ACOT…	0.00213983	0.0551979	207	JKAP, SLC7A9, BAD, KCNK15, Cadherin 22, HLA-DQB1, KIAA1838, HLA-A2, NOX5, QKI, Collagen XXVI, Ski, C19orf51, NOX4, Paralemmin, ASB16, PTPR-delta, SLURP1, NPR3, NF-AT5, OMA1, Epimorphin, NANOS2, DKKL1, NHE3, PCDHB4, HTR4, CARD7, PSMD14, Tyro3, MICALCL, PDE10A, Tenascin-X, p90RSK3(RPS6KA2), HLA-A68, VPS13A, AFAP, PANX2, Rab-17, Enkephalin A, LRAT, C17, OR8D4, GRIK4, SLAC2-B, 1B57_HUMAN, ASCT2 (SLC1…	0.00157291	0.049824	563	SCAP2, FOXI2, ARHGAP20, MGMT, DCDC2, SIX2, ATP6V1G1, SLC25A22, CUTL2, TEF-1, DNAH5, MILI, Gpr156, CERT, NGL-1, Plectin 1, Septin 8, PSMB1, MIWI, Chapsyn-110, InPP5A, L-type Ca(II) channel, alpha 1C subunit, BMP8A, ERCC6, PKC-zeta, BETA-PIX, SES1, Cadherin 18 (or 14), type II, MSX1, FYCO1, RecQL4, Galpha(i)-specificTHR&S GPCR (motilin receptor), OMgp, NR3B, SLIT3, UNC13C, Kv4.3 channel, PDE6B, Muc…
15	single organism signaling	5050	0.00193225	0.0484147	0.0250733	0.25146	81	JKAP, HLA-DQB1, HLA-A2, Ski, ASB16, NF-AT5, PCDHB4, HTR4, CARD7, PSMD14, Tyro3, PDE10A, p90RSK3(RPS6KA2), AFAP, HLA-A68, PANX2, Rab-17, Enkephalin A, C17, OR8D4, GCN2, TBX5, AHRR, ODZ2, Raptor, Tiam2, IFI17, Mu-type opioid receptor, NRTN, Nucleoredoxin, PGRP-S, HLADPA1, PAR1, Thyroglobulin, APOC2, OR7A5, WNT3, XAF1, ODZ1, RAIDD, Kir1.1, CERK1, CD40(TNFRSF5), PRKAR1B, HLA-DQB2, Livin, SLC6A12, HLA…	0.00221793	0.0484147	64	Carboxypeptidase H, BAD, GPR133, DAB1, QKI, Ski, ASB16, PTPR-delta, Fibromodulin, NPR3, NF-AT5, P/Q-type calcium channel alpha-1A subunit, Epimorphin, DKKL1, CENTG2, Syntaxin 1B, CARD7, Tyro3, KLHL6, PSMD1, AFAP, PANX2, Rab-17, GluR1, LRAT, 1B35_HUMAN, GRIK4, 1B57_HUMAN, GCN2, PRAS40, GLI-2, AHRR, ODZ2, NKp46, Raptor, HLA-B7, CD244, ACM3, ITGB3, Tiam2, Ephexin, HLAB, NRTN, Nucleoredoxin, RIMS4, B…	0.00646524	0.102198	203	SCAP2, ARHGAP20, ERR3, ATP6V1G1, AP-2A, CIDE-B, ITGA10, PSMB1, Chapsyn-110, LTBR2, BMP8A, ERCC6, SORCS2, PKC-zeta, GCR-alpha, BETA-PIX, TBX5, MSX1, Galpha(i)-specificTHR&S GPCR (motilin receptor), OMgp, NR3B, HOXA5, SLIT3, PDE6B, PKR, Neurofibromin, Nucleoredoxin, NPFF receptor 2, NDRG1, LTBR1, HLADPA1, KCNK2, DLX5, OR4A15, ACOT11, Caspase-1, BPGAP1, GPCR135, CNTN1 (F3), Caspr2, ZAP70, HCN2, BAI1…	0.0104965	0.182471	142	ROR-alpha, DCDC2, ADAM12, TEF-1, CERT, Gpr156, PHL1, RBP4, RIMS1, L-type Ca(II) channel, alpha 1C subunit, SORCS2, PKC-zeta, UNC13C, Kv4.3 channel, PDE6B, PKR, Neurofibromin, Nucleoredoxin, IP3R1, ACOT11, DOCK10, BAI1, GRID1, ARHGAP12, Myosin X, Livin, ERG, CRIPTO-3, OAS1, PAFAH alpha (LIS1), Alpha-1D adrenergic receptor, LRH1, Neurexin 1-alpha, CACNB2, Rab-40C, GCPIII, BCDO, Capsaicin receptor, …	0.00193225	0.0506101	109	JKAP, BAD, HLA-DQB1, HLA-A2, QKI, Ski, ASB16, PTPR-delta, NPR3, NF-AT5, Epimorphin, DKKL1, PCDHB4, HTR4, CARD7, PSMD14, Tyro3, PDE10A, p90RSK3(RPS6KA2), HLA-A68, AFAP, PANX2, Rab-17, Enkephalin A, LRAT, C17, OR8D4, GRIK4, 1B57_HUMAN, GCN2, PRAS40, TBX5, AHRR, ODZ2, Raptor, HLA-B7, Tiam2, Ephexin, IFI17, Mu-type opioid receptor, HLAB, NRTN, Nucleoredoxin, RIMS4, PGRP-S, HLADPA1, PAR1, Thyroglobuli…	0.00399605	0.0865547	279	SCAP2, ARHGAP20, DCDC2, ATP6V1G1, TEF-1, Gpr156, CERT, PSMB1, Chapsyn-110, L-type Ca(II) channel, alpha 1C subunit, BMP8A, ERCC6, PKC-zeta, BETA-PIX, MSX1, Galpha(i)-specificTHR&S GPCR (motilin receptor), OMgp, NR3B, SLIT3, UNC13C, Kv4.3 channel, PDE6B, Neurofibromin, NPFF receptor 2, NDRG1, HLADPA1, ACOT11, IP3R1, CNTN1 (F3), Caspr2, BLOS1, GRID1, ASZ1, HLA-DQB2, OAS1, RHG7, Neurexin 1-alpha, CA…
16	signaling	5050	0.00193225	0.0484147	0.0250733	0.25146	81	JKAP, HLA-DQB1, HLA-A2, Ski, ASB16, NF-AT5, PCDHB4, HTR4, CARD7, PSMD14, Tyro3, PDE10A, p90RSK3(RPS6KA2), AFAP, HLA-A68, PANX2, Rab-17, Enkephalin A, C17, OR8D4, GCN2, TBX5, AHRR, ODZ2, Raptor, Tiam2, IFI17, Mu-type opioid receptor, NRTN, Nucleoredoxin, PGRP-S, HLADPA1, PAR1, Thyroglobulin, APOC2, OR7A5, WNT3, XAF1, ODZ1, RAIDD, Kir1.1, CERK1, CD40(TNFRSF5), PRKAR1B, HLA-DQB2, Livin, SLC6A12, HLA…	0.00221793	0.0484147	64	Carboxypeptidase H, BAD, GPR133, DAB1, QKI, Ski, ASB16, PTPR-delta, Fibromodulin, NPR3, NF-AT5, P/Q-type calcium channel alpha-1A subunit, Epimorphin, DKKL1, CENTG2, Syntaxin 1B, CARD7, Tyro3, KLHL6, PSMD1, AFAP, PANX2, Rab-17, GluR1, LRAT, 1B35_HUMAN, GRIK4, 1B57_HUMAN, GCN2, PRAS40, GLI-2, AHRR, ODZ2, NKp46, Raptor, HLA-B7, CD244, ACM3, ITGB3, Tiam2, Ephexin, HLAB, NRTN, Nucleoredoxin, RIMS4, B…	0.00646524	0.102198	203	SCAP2, ARHGAP20, ERR3, ATP6V1G1, AP-2A, CIDE-B, ITGA10, PSMB1, Chapsyn-110, LTBR2, BMP8A, ERCC6, SORCS2, PKC-zeta, GCR-alpha, BETA-PIX, TBX5, MSX1, Galpha(i)-specificTHR&S GPCR (motilin receptor), OMgp, NR3B, HOXA5, SLIT3, PDE6B, PKR, Neurofibromin, Nucleoredoxin, NPFF receptor 2, NDRG1, LTBR1, HLADPA1, KCNK2, DLX5, OR4A15, ACOT11, Caspase-1, BPGAP1, GPCR135, CNTN1 (F3), Caspr2, ZAP70, HCN2, BAI1…	0.0104965	0.182471	142	ROR-alpha, DCDC2, ADAM12, TEF-1, CERT, Gpr156, PHL1, RBP4, RIMS1, L-type Ca(II) channel, alpha 1C subunit, SORCS2, PKC-zeta, UNC13C, Kv4.3 channel, PDE6B, PKR, Neurofibromin, Nucleoredoxin, IP3R1, ACOT11, DOCK10, BAI1, GRID1, ARHGAP12, Myosin X, Livin, ERG, CRIPTO-3, OAS1, PAFAH alpha (LIS1), Alpha-1D adrenergic receptor, LRH1, Neurexin 1-alpha, CACNB2, Rab-40C, GCPIII, BCDO, Capsaicin receptor, …	0.00193225	0.0506101	109	JKAP, BAD, HLA-DQB1, HLA-A2, QKI, Ski, ASB16, PTPR-delta, NPR3, NF-AT5, Epimorphin, DKKL1, PCDHB4, HTR4, CARD7, PSMD14, Tyro3, PDE10A, p90RSK3(RPS6KA2), HLA-A68, AFAP, PANX2, Rab-17, Enkephalin A, LRAT, C17, OR8D4, GRIK4, 1B57_HUMAN, GCN2, PRAS40, TBX5, AHRR, ODZ2, Raptor, HLA-B7, Tiam2, Ephexin, IFI17, Mu-type opioid receptor, HLAB, NRTN, Nucleoredoxin, RIMS4, PGRP-S, HLADPA1, PAR1, Thyroglobuli…	0.00399605	0.0865547	279	SCAP2, ARHGAP20, DCDC2, ATP6V1G1, TEF-1, Gpr156, CERT, PSMB1, Chapsyn-110, L-type Ca(II) channel, alpha 1C subunit, BMP8A, ERCC6, PKC-zeta, BETA-PIX, MSX1, Galpha(i)-specificTHR&S GPCR (motilin receptor), OMgp, NR3B, SLIT3, UNC13C, Kv4.3 channel, PDE6B, Neurofibromin, NPFF receptor 2, NDRG1, HLADPA1, ACOT11, IP3R1, CNTN1 (F3), Caspr2, BLOS1, GRID1, ASZ1, HLA-DQB2, OAS1, RHG7, Neurexin 1-alpha, CA…
17	positive regulation of ERK1 and ERK2 cascade	114	0.00335981	0.0742867	0.00415536	0.176026	6	NOX4, ST5, Mu-type opioid receptor, PAR1, HTR2A, HTR2B	0.0217868	0.235507	4	NOX4, ST5, ITGB3, PAR1	0.00630705	0.100664	10	PKC-zeta, BPGAP1, C3, VEGFR-3, M-CSF receptor, PRR5-ARHGAP8, EDNRA, PDGF-R-alpha, RANK(TNFRSF11A), FGFR2	0.00595943	0.149354	8	PKC-zeta, C3, M-CSF receptor, PRR5-ARHGAP8, Alpha-1A adrenergic receptor, HTR2A, PDGF-R-alpha, PDGF-R-beta	0.00335981	0.0742867	7	NOX4, ST5, Mu-type opioid receptor, PAR1, HTR2A, ITGB3, HTR2B	0.00345349	0.0786176	13	PKC-zeta, PRR5-ARHGAP8, PDGF-R-alpha, FGFR2, BPGAP1, C3, VEGFR-3, M-CSF receptor, Alpha-1A adrenergic receptor, EDNRA, HTR2A, RANK(TNFRSF11A), PDGF-R-beta
