# Supplementary figures and images for: The effect of genotype and in utero environment on interindividual variation in neonate DNA methylomes
Source: HighWire-hosted journal article supplement (doi:10.1101/gr.171439.113), 2014-04-07

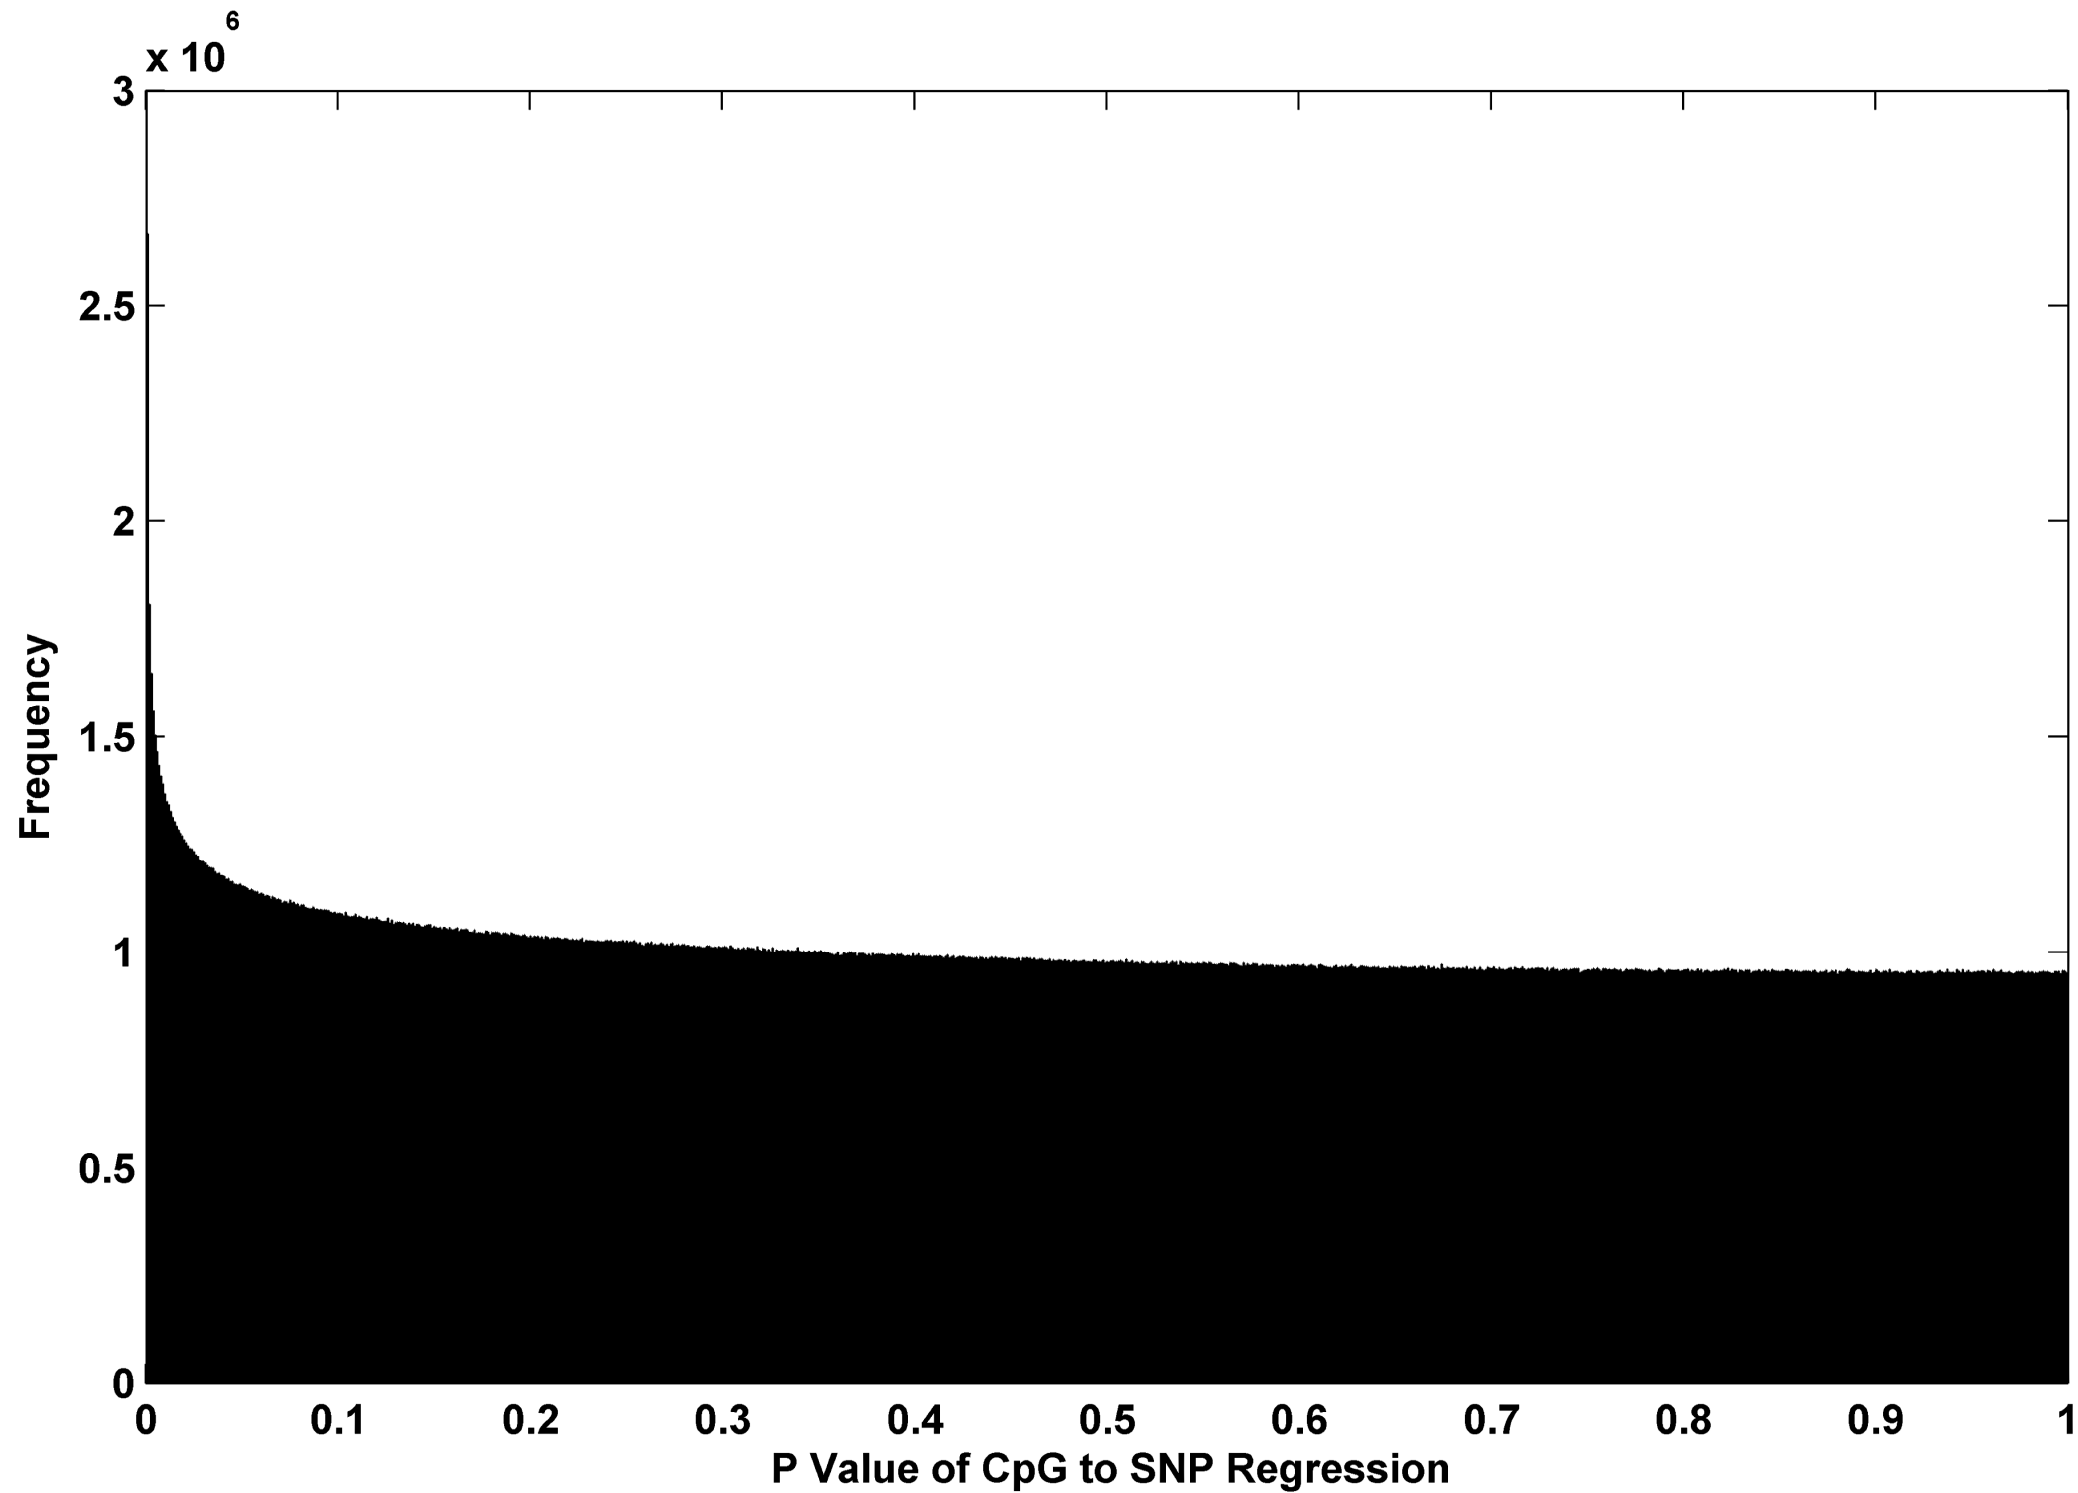

# A

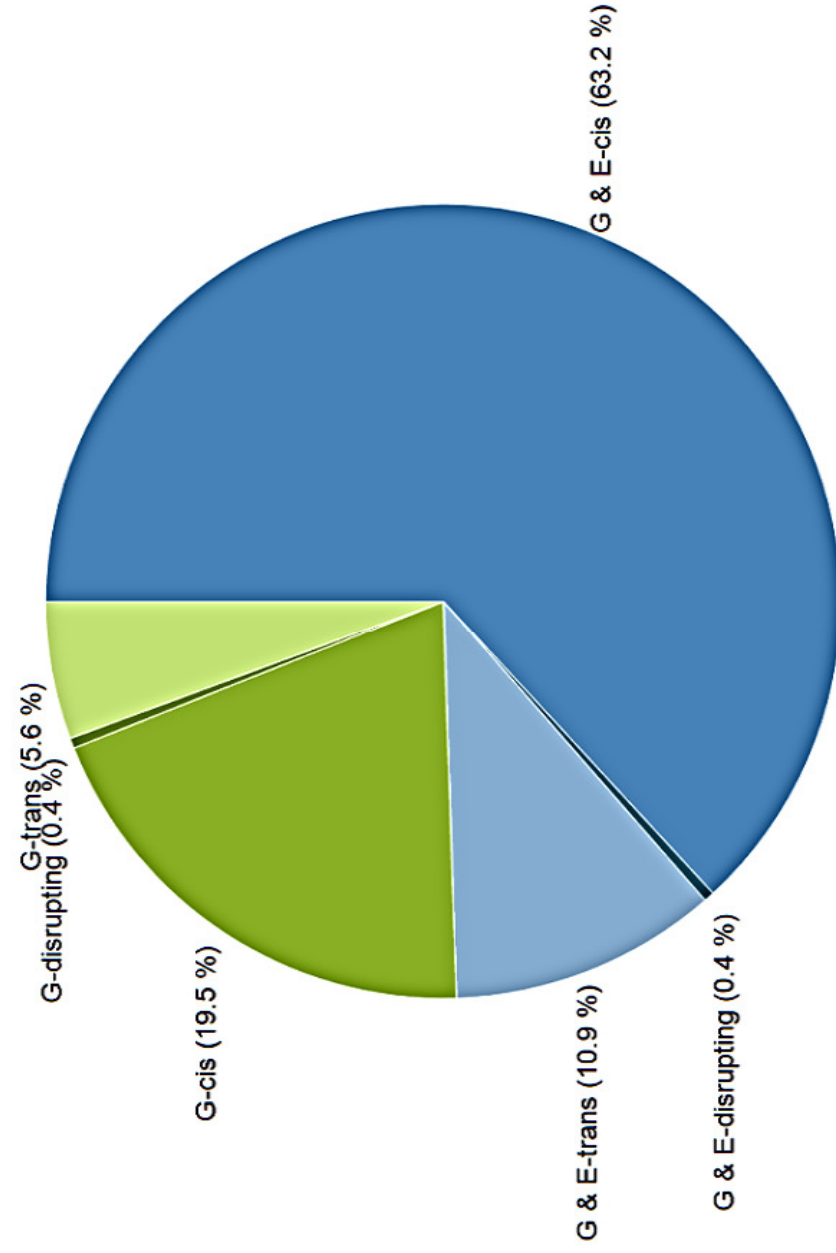

# B

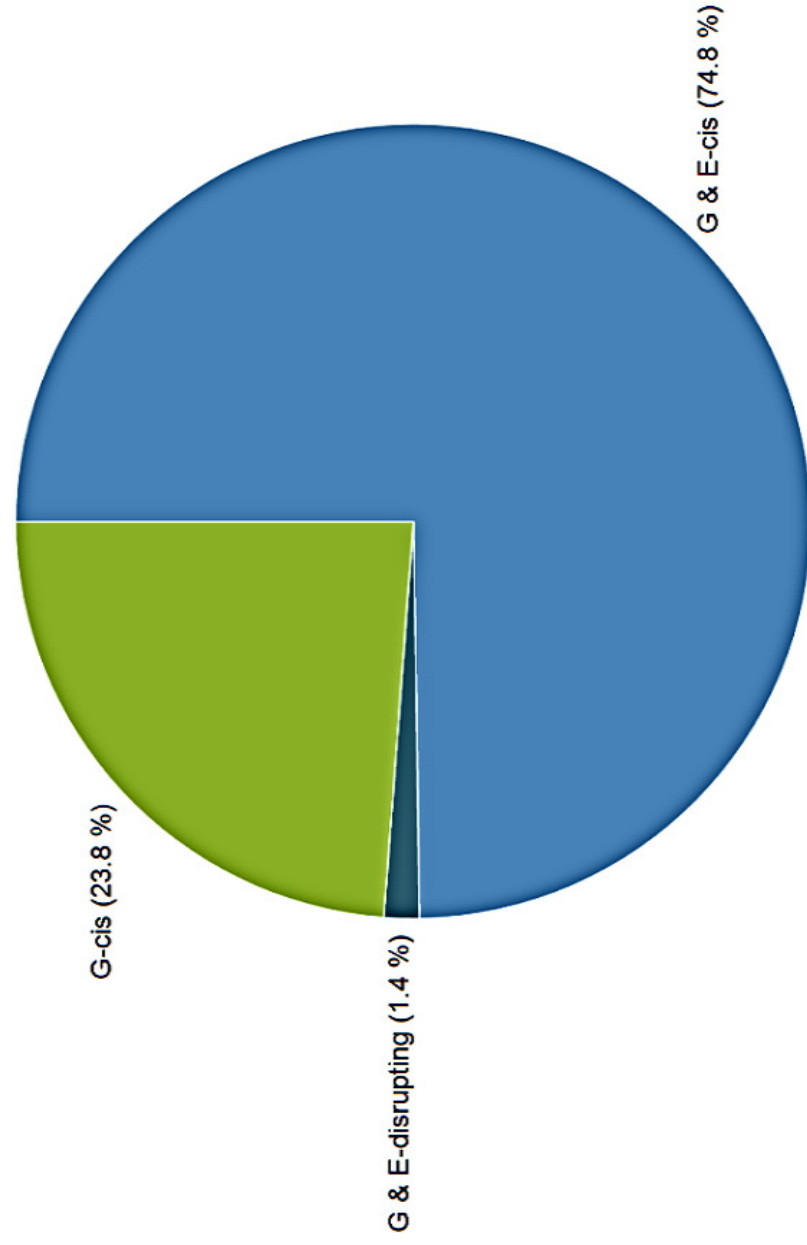

**A**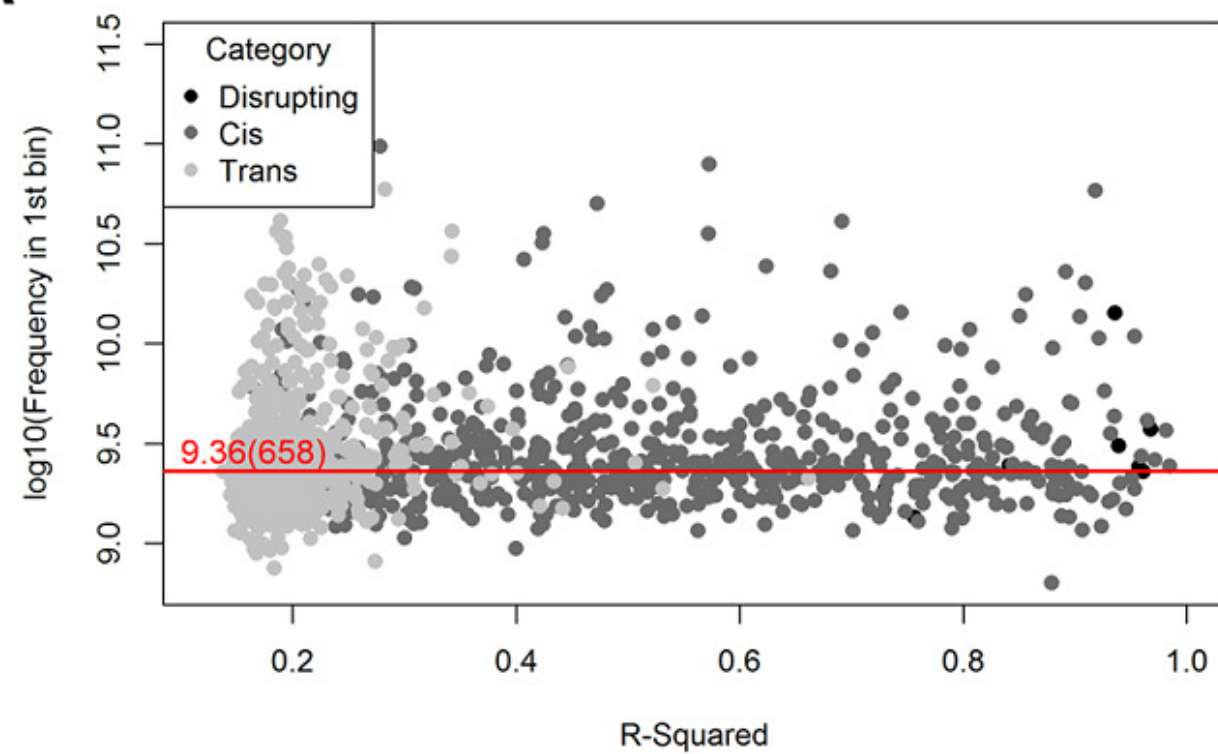**B**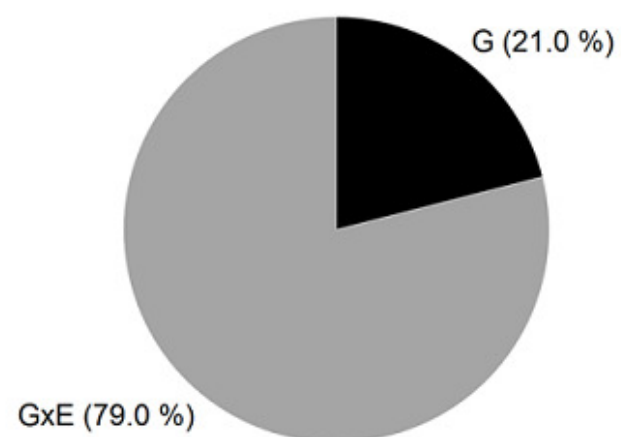

**A**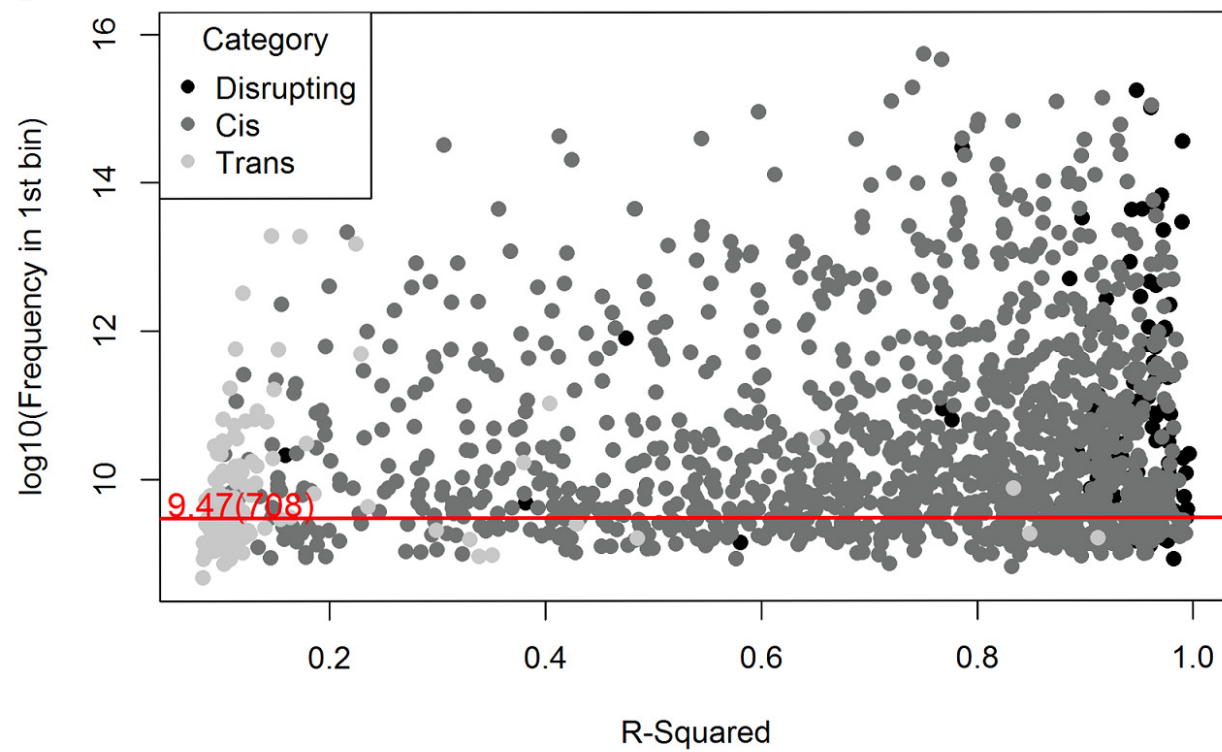**B**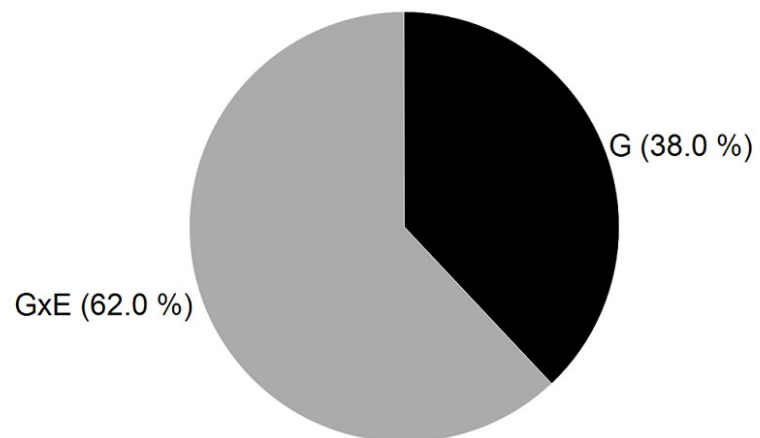

Supplement: Supplemental_Figures_2-5.pdf [file Supplemental_Figures_2-5.pdf]
